# Supplementary material for: Data Mining by Pluralistic Approach on CRISPR Gene Editing in Plants
Source: Front Plant Sci. 2019 Jul 9;10:801. doi: 10.3389/fpls.2019.00801 (PMC6632506; doi:10.3389/fpls.2019.00801)
Supplement: MATERIAL S2 — Timeline data fragments of Whole, Review and Original Articles; Sheet 1: Composites of all CRIPSR Specific articles with PMID, Digital Object ID, Article Title, Abstract, Language, Journal, Title Journal, Abbreviation Journal, NLM ID, Journal Year, Journal Month, Journal Medline Date, Journal Volume, Journal Issue, Journal Medline Pagination, Citation Medium, First Author (First Last), All authors (Last, Initials), Affiliation, Related, Citations, Related Citation, Related Articles by Review, Related Articles by Review (Medline format), Article Type. [file Table_1.XLSX]

## Sheet: Complete Retreived Publications
PMID	Digital Object ID	Article Title	Abstract	Language	Journal: Title	Journal: Abbreviation	Journal: NLM ID	Journal: Year	Journal: Month	Journal: Medline Date	Journal: Volume	Journal: Issue	Journal: Medline Pagination	Citation Medium	First Author (First Last)	All Authors (Last, Initials)	Affiliation	Related Citations	Related Citations (XML format)	Related Articles by Review	Related Articles by Review (Medline format)	Article Type
29362095	10.1016/j.plantsci.2017.11.015	The newly identified heat-stress sensitive albino 1 gene affects chloroplast development in rice.	High temperature, a major abiotic stress, significantly affects the yield and quality of crops in many parts of the world. Components of the photosynthetic apparatus are highly susceptible to thermal damage. Although the responses to acute heat stress have been studied intensively, the mechanisms that regulate chloroplast development under heat stress remain obscure, especially in crop plants. He…	eng	Plant science : an international journal of experimental plant biology	Plant Sci	9882015	2018	Feb		267		168-179	Internet	Zhennan Qiu	Qiu, Z; Kang, S; He, L; Zhao, J; Zhang, S; Hu, J; Zeng, D; Zhang, G; Dong, G; Gao, Z; Ren, D; Chen, G; Guo, L; Qian, Q; Zhu, L	State Key Laboratory of Rice Biology, China National Rice Research Institute, Hangzhou 310006, China.	click here	click here	click here	click here	journal
27677493	10.1007/s00018-016-2380-1	Heritability of targeted gene modifications induced by plant-optimized CRISPR systems.	The Streptococcus-derived CRISPR (Clustered Regularly Interspaced Short Palindromic Repeats)/Cas9 (CRISPR-associated protein 9) system has emerged as a very powerful tool for targeted gene modifications in many living organisms including plants. Since the first application of this system for plant gene modification in 2013, this RNA-guided DNA endonuclease system has been extensively engineered t…	eng	Cellular and molecular life sciences : CMLS	Cell Mol Life Sci	9705402	2017	Mar		74	6	1075-1093	Internet	Yanfei Mao	Mao, Y; Botella, JR; Zhu, JK	Shanghai Center for Plant Stress Biology, Chinese Academy of Sciences, Shanghai, 200032, China. yfmao@sibs.ac.cn.	click here	click here	click here	click here	journal
27943461	10.1111/tpj.13446	High-efficiency gene targeting in hexaploid wheat using DNA replicons and CRISPR/Cas9.	The ability to edit plant genomes through gene targeting (GT) requires efficient methods to deliver both sequence-specific nucleases (SSNs) and repair templates to plant cells. This is typically achieved using Agrobacterium T-DNA, biolistics or by stably integrating nuclease-encoding cassettes and repair templates into the plant genome. In dicotyledonous plants, such as Nicotinana tabacum (tobacc…	eng	The Plant journal : for cell and molecular biology	Plant J	9207397	2017	Mar		89	6	1251-1262	Internet	Javier Gil-Humanes	Gil-Humanes, J; Wang, Y; Liang, Z; Shan, Q; Ozuna, CV; Sánchez-León, S; Baltes, NJ; Starker, C; Barro, F; Gao, C; Voytas, DF	Department of Genetics, Cell Biology, and Development, Center for Genome Engineering, University of Minnesota, Minneapolis, MN, 55455, USA.	click here	click here	click here	click here	journal
27918538	10.1038/ng.3733	Variation in the flowering gene SELF PRUNING 5G promotes day-neutrality and early yield in tomato.	Plants evolved so that their flowering is triggered by seasonal changes in day length. However, day-length sensitivity in crops limits their geographical range of cultivation, and thus modification of the photoperiod response was critical for their domestication. Here we show that loss of day-length-sensitive flowering in tomato was driven by the florigen paralog and flowering repressor SELF-PRUN…	eng	Nature genetics	Nat Genet	9216904	2017	01		49	1	162-168	Internet	Sebastian Soyk	Soyk, S; Müller, NA; Park, SJ; Schmalenbach, I; Jiang, K; Hayama, R; Zhang, L; Van Eck, J; Jiménez-Gómez, JM; Lippman, ZB	Cold Spring Harbor Laboratory, Cold Spring Harbor, New York, USA.	click here	click here	click here	click here	journal
27995308	10.1007/s00299-016-2089-5	Efficient CRISPR/Cas9-based gene knockout in watermelon.	CRISPR/Cas9 system can precisely edit genomic sequence and effectively create knockout mutations in T0 generation watermelon plants. Genome editing offers great advantage to reveal gene function and generate agronomically important mutations to crops. Recently, RNA-guided genome editing system using the type II clustered regularly interspaced short palindromic repeats (CRISPR)-associated protein …	eng	Plant cell reports	Plant Cell Rep	9880970	2017	Mar		36	3	399-406	Internet	Shouwei Tian	Tian, S; Jiang, L; Gao, Q; Zhang, J; Zong, M; Zhang, H; Ren, Y; Guo, S; Gong, G; Liu, F; Xu, Y	National Engineering Research Center for Vegetables, Beijing Academy of Agriculture and Forestry Sciences, Key Laboratory of Biology and Genetic Improvement of Horticultural Crops (North China), Beijing Key Laboratory of Vegetable Germplasm Improvement, Beijing, 100097, China.	click here	click here	click here	click here	journal
28928381	10.1038/s41598-017-12262-1	CRISPR/Cas9-induced Targeted Mutagenesis and Gene Replacement to Generate Long-shelf Life Tomato Lines.	Quickly and precisely gain genetically enhanced breeding elites with value-adding performance traits is desired by the crop breeders all the time. The present of gene editing technologies, especially the CRISPR/Cas9 system with the capacities of efficiency, versatility and multiplexing provides a reasonable expectation towards breeding goals. For exploiting possible application to accelerate the …	eng	Scientific reports	Sci Rep	101563288	2017	Sep		7	1	11874	Internet	Qing-Hui Yu	Yu, QH; Wang, B; Li, N; Tang, Y; Yang, S; Yang, T; Xu, J; Guo, C; Yan, P; Wang, Q; Asmutola, P	Institute of Horticulture, Xinjiang Academy of Agricultural Science, Urumqi, 830091, China. yuqinghui98@sina.com.	click here	click here	click here	click here	journal
28444368	10.1093/pcp/pcx058	Simultaneous Targeting of Multiple Gene Homeologs to Alter Seed Oil Production in Camelina sativa.	The ability to transform Camelina sativa easily with biosynthetic enzymes derived from other plants has made this oil seed crop an ideal platform for the production of unusual lipids valuable for different applications. However, in addition to expressing transgenic enzymes, the suppression of endogenous enzyme activity to reduce competition for common substrates or cofactors is also required to e…	eng	Plant & cell physiology	Plant Cell Physiol	9430925	2017	Jul		58	7	1260-1267	Internet	J A Aznar-Moreno	Aznar-Moreno, JA; Durrett, TP	Department of Biochemistry and Molecular Biophysics, Kansas State University, Manhattan, KS 66506, USA.	click here	click here	click here	click here	journal
27885771	10.1111/pbi.12671	Selective gene dosage by CRISPR-Cas9 genome editing in hexaploid Camelina sativa.	In many plant species, gene dosage is an important cause of phenotype variation. Engineering gene dosage, particularly in polyploid genomes, would provide an efficient tool for plant breeding. The hexaploid oilseed crop Camelina sativa, which has three closely related expressed subgenomes, is an ideal species for investigation of the possibility of creating a large collection of combinatorial mut…	eng	Plant biotechnology journal	Plant Biotechnol J	101201889	2017	Jun		15	6	729-739	Internet	Céline Morineau	Morineau, C; Bellec, Y; Tellier, F; Gissot, L; Kelemen, Z; Nogué, F; Faure, JD	Institut Jean-Pierre Bourgin (IJPB), INRA, AgroParisTech, CNRS, Saclay Plant Sciences (SPS), Université Paris-Saclay, Versailles, France.	click here	click here	click here	click here	journal
28913802	10.1007/978-1-4939-7337-8_12	Design and Assembly of CRISPR/Cas9 Reagents for Gene Knockout, Targeted Insertion, and Replacement in Wheat.	Advances in cereal transformation along with the completion of the wheat genome sequence assembly have increased the demand for tools that perform targeted and specific modifications in this crop plant. This protocol demonstrates the construction of reagents using a comprehensive genome engineering kit to create single and multiple gene "knockouts," site-specific chromosome deletions and gene rep…	eng	Methods in molecular biology (Clifton, N.J.)	Methods Mol Biol	9214969	2017			1679		187-212	Internet	Tomáš Čermák	Čermák, T; Curtin, SJ	Department of Genetics, Cell Biology and Development and Center for Genome Engineering, University of Minnesota, 1500 Gortner Avenue, Minneapolis, MN, 55455, USA. tcermak@umn.edu.	click here	click here	click here	click here	journal
27936512	10.1111/pbi.12677	Genome editing of the disease susceptibility gene CsLOB1 in citrus confers resistance to citrus canker.	Citrus is a highly valued tree crop worldwide, while, at the same time, citrus production faces many biotic challenges, including bacterial canker and Huanglongbing (HLB). Breeding for disease-resistant varieties is the most efficient and sustainable approach to control plant diseases. Traditional breeding of citrus varieties is challenging due to multiple limitations, including polyploidy, polye…	eng	Plant biotechnology journal	Plant Biotechnol J	101201889	2017	Jul		15	7	817-823	Internet	Hongge Jia	Jia, H; Zhang, Y; Orbović, V; Xu, J; White, FF; Jones, JB; Wang, N	Citrus Research and Education Center, Department of Microbiology and Cell Science, Institute of Food and Agricultural Sciences (IFAS), University of Florida, Lake Alfred, FL, USA.	click here	click here	click here	click here	journal
27146973	10.1007/s00299-016-1989-8	Applications of CRISPR/Cas9 technology for targeted mutagenesis, gene replacement and stacking of genes in higher plants.	Mutagenesis continues to play an essential role for understanding plant gene function and, in some instances, provides an opportunity for plant improvement. The development of gene editing technologies such as TALENs and zinc fingers has revolutionised the targeted mutation specificity that can now be achieved. The CRISPR/Cas9 system is the most recent addition to gene editing technologies and ar…	eng	Plant cell reports	Plant Cell Rep	9880970	2016	Jul		35	7	1439-50	Internet	Ming Luo	Luo, M; Gilbert, B; Ayliffe, M	CSIRO Agriculture, Box 1600, Clunies Ross Street, Canberra, ACT, 2601, Australia.	click here	click here	click here	click here	journal
27001477	10.16288/j.yczz.15-327	[The application of genome editing in identification of plant gene function and crop breeding].	Plant genome can be modified via current biotechnology with high specificity and excellent efficiency. Zinc finger nucleases (ZFN), transcription activator-like effector nucleases (TALEN) and clustered regularly interspaced short palindromic repeats (CRISPR)/CRISPR-associated 9 (Cas9) system are the key engineered nucleases used in the genome editing. Genome editing techniques enable gene targete…	chi	Yi chuan = Hereditas	Yi Chuan	9436478	2016	03		38	3	227-42	Print	Xiang-chun Zhou	Zhou, XC; Xing, YZ	National Key Laboratory of Crop Genetic Improvement, Huazhong Agricultural University, Wuhan 430070, China.	click here	click here	click here	click here	journal
26261084	10.1111/pbi.12448	Use of designer nucleases for targeted gene and genome editing in plants.	The ability to efficiently inactivate or replace genes in model organisms allowed a rapid expansion of our understanding of many of the genetic, biochemical, molecular and cellular mechanisms that support life. With the advent of new techniques for manipulating genes and genomes that are applicable not only to single-celled organisms, but also to more complex organisms such as animals and plants,…	eng	Plant biotechnology journal	Plant Biotechnol J	101201889	2016	Feb		14	2	483-95	Internet	Donald P Weeks	Weeks, DP; Spalding, MH; Yang, B	Department of Biochemistry, University of Nebraska, Lincoln, NE, USA.	click here	click here	click here	click here	journal
28066481	10.3389/fpls.2016.01928	Precise Genome Modification via Sequence-Specific Nucleases-Mediated Gene Targeting for Crop Improvement.	Genome editing technologies enable precise modifications of DNA sequencesin vivoand offer a great promise for harnessing plant genes in crop improvement. The precise manipulation of plant genomes relies on the induction of DNA double-strand breaks by sequence-specific nucleases (SSNs) to initiate DNA repair reactions that are based on either non-homologous end joining (NHEJ) or homology-directed …	eng	Frontiers in plant science	Front Plant Sci	101568200	2016			7		1928	Print	Yongwei Sun	Sun, Y; Li, J; Xia, L	Institute of Crop Sciences (ICS), Chinese Academy of Agricultural Sciences (CAAS) Beijing, China.	click here	click here	click here	click here	journal
26503400	10.1111/pbi.12496	Oligonucleotide-directed mutagenesis for precision gene editing.	Differences in gene sequences, many of which are single nucleotide polymorphisms, underlie some of the most important traits in plants. With humanity facing significant challenges to increase global agricultural productivity, there is an urgent need to accelerate the development of these traits in plants. oligonucleotide-directed mutagenesis (ODM), one of the many tools of Cibus' Rapid Trait Deve…	eng	Plant biotechnology journal	Plant Biotechnol J	101201889	2016	Feb		14	2	496-502	Internet	Noel J Sauer	Sauer, NJ; Mozoruk, J; Miller, RB; Warburg, ZJ; Walker, KA; Beetham, PR; Schöpke, CR; Gocal, GF	Cibus, San Diego, CA, USA.	click here	click here	click here	click here	journal
27033976	10.1038/srep23890	An alternative strategy for targeted gene replacement in plants using a dual-sgRNA/Cas9 design.	Precision DNA/gene replacement is a promising genome-editing tool that is highly desirable for molecular engineering and breeding by design. Although the CRISPR/Cas9 system works well as a tool for gene knockout in plants, gene replacement has rarely been reported. Towards this end, we first designed a combinatory dual-sgRNA/Cas9 vector (construct #1) that successfully deleted miRNA gene regions …	eng	Scientific reports	Sci Rep	101563288	2016	Apr		6		23890	Internet	Yongping Zhao	Zhao, Y; Zhang, C; Liu, W; Gao, W; Liu, C; Song, G; Li, WX; Mao, L; Chen, B; Xu, Y; Li, X; Xie, C	Institute of Crop Science, Chinese Academy of Agricultural Sciences, National Key Facility for Crop Gene Resources and Genetic Improvement, Beijing, 100081 China.	click here	click here	click here	click here	journal
27116122	10.1371/journal.pone.0154027	Enhanced Rice Blast Resistance by CRISPR/Cas9-Targeted Mutagenesis of the ERF Transcription Factor Gene OsERF922.	Rice blast is one of the most destructive diseases affecting rice worldwide. The adoption of host resistance has proven to be the most economical and effective approach to control rice blast. In recent years, sequence-specific nucleases (SSNs) have been demonstrated to be powerful tools for the improvement of crops via gene-specific genome editing, and CRISPR/Cas9 is thought to be the most effect…	eng	PloS one	PLoS One	101285081	2016			11	4	e0154027	Internet	Fujun Wang	Wang, F; Wang, C; Liu, P; Lei, C; Hao, W; Gao, Y; Liu, YG; Zhao, K	College of Agriculture, Guangxi University, Nanning, China.	click here	click here	click here	click here	journal
26961357	10.1007/s10709-016-9893-2	Comparative analysis of genome-wide Mlo gene family in Cajanus cajan and Phaseolus vulgaris.	The Mlo gene was discovered in barley because the mutant 'mlo' allele conferred broad-spectrum, non-race-specific resistance to powdery mildew caused by Blumeria graminis f. sp. hordei. The Mlo genes also play important roles in growth and development of plants, and in responses to biotic and abiotic stresses. The Mlo gene family has been characterized in several crop species, but only a single l…	eng	Genetica	Genetica	0370740	2016	Apr		144	2	229-41	Internet	Reena Deshmukh	Deshmukh, R; Singh, VK; Singh, BD	Faculty of Science, School of Biotechnology, Banaras Hindu University, Varanasi, 221005, India.	click here	click here	click here	click here	journal
26475194	10.1016/j.plantsci.2015.09.011	CRISPR/Cas9-mediated genome editing and gene replacement in plants: Transitioning from lab to field.	The CRISPR/Cas9 genome engineering system has ignited and swept through the scientific community like wildfire. Owing largely to its efficiency, specificity, and flexibility, the CRISPR/Cas9 system has quickly become the preferred genome-editing tool of plant scientists. In plants, much of the early CRISPR/Cas9 work has been limited to proof of concept and functional studies in model systems. The…	eng	Plant science : an international journal of experimental plant biology	Plant Sci	9882015	2015	Nov		240		130-42	Internet	Scott M Schaeffer	Schaeffer, SM; Nakata, PA	USDA/ARS Children's Nutrition Research Center, Department of Pediatrics, Baylor College of Medicine, Houston, TX 77030-2600, United States.	click here	click here	click here	click here	journal
26269544	10.1104/pp.15.00793	Targeted Mutagenesis, Precise Gene Editing, and Site-Specific Gene Insertion in Maize Using Cas9 and Guide RNA.	Targeted mutagenesis, editing of endogenous maize (Zea mays) genes, and site-specific insertion of a trait gene using clustered regularly interspaced short palindromic repeats (CRISPR)-associated (Cas)-guide RNA technology are reported in maize. DNA vectors expressing maize codon-optimized Streptococcus pyogenes Cas9 endonuclease and single guide RNAs were cointroduced with or without DNA repair …	eng	Plant physiology	Plant Physiol	0401224	2015	Oct		169	2	931-45	Internet	Sergei Svitashev	Svitashev, S; Young, JK; Schwartz, C; Gao, H; Falco, SC; Cigan, AM	Trait Enabling Technologies, DuPont Pioneer, Johnston, Iowa 50131 mark.cigan@pioneer.com.	click here	click here	click here	click here	journal
24854982	10.1111/pbi.12200	The CRISPR/Cas9 system produces specific and homozygous targeted gene editing in rice in one generation.	The CRISPR/Cas9 system has been demonstrated to efficiently induce targeted gene editing in a variety of organisms including plants. Recent work showed that CRISPR/Cas9-induced gene mutations in Arabidopsis were mostly somatic mutations in the early generation, although some mutations could be stably inherited in later generations. However, it remains unclear whether this system will work similar…	eng	Plant biotechnology journal	Plant Biotechnol J	101201889	2014	Aug		12	6	797-807	Internet	Hui Zhang	Zhang, H; Zhang, J; Wei, P; Zhang, B; Gou, F; Feng, Z; Mao, Y; Yang, L; Zhang, H; Xu, N; Zhu, JK	Shanghai Center for Plant Stress Biology, Chinese Academy of Sciences, Shanghai, China.	click here	click here	click here	click here	journal
24122057	10.1534/g3.113.008847	RNA-guided genome editing for target gene mutations in wheat.	The clustered, regularly interspaced, short palindromic repeats (CRISPR) and CRISPR-associated protein (Cas) system has been used as an efficient tool for genome editing. We report the application of CRISPR-Cas-mediated genome editing to wheat (Triticum aestivum), the most important food crop plant with a very large and complex genome. The mutations were targeted in the inositol oxygenase (inox) …	eng	G3 (Bethesda, Md.)	G3 (Bethesda)	101566598	2013	Dec		3	12	2233-8	Internet	Santosh Kumar Upadhyay	Upadhyay, SK; Kumar, J; Alok, A; Tuli, R	National Agri-Food Biotechnology Institute, Department of Biotechnology, Government of India, Mohali, Punjab, India 160071.	click here	click here	click here	click here	journal
23999092	10.1093/nar/gkt780	Demonstration of CRISPR/Cas9/sgRNA-mediated targeted gene modification in Arabidopsis, tobacco, sorghum and rice.	The type II CRISPR/Cas system from Streptococcus pyogenes and its simplified derivative, the Cas9/single guide RNA (sgRNA) system, have emerged as potent new tools for targeted gene knockout in bacteria, yeast, fruit fly, zebrafish and human cells. Here, we describe adaptations of these systems leading to successful expression of the Cas9/sgRNA system in two dicot plant species, Arabidopsis and t…	eng	Nucleic acids research	Nucleic Acids Res	0411011	2013	Nov		41	20	e188	Internet	Wenzhi Jiang	Jiang, W; Zhou, H; Bi, H; Fromm, M; Yang, B; Weeks, DP	Department of Biochemistry, University of Nebraska, Lincoln, NE 68588, USA, Deparment of Genetics, Development and Cell Biology, Iowa State University, Ames, IA 50011, USA and Department of Agronomy and Horticulture, University of Nebraska, Lincoln, NE 68588, USA.	click here	click here	click here	click here	journal
29314827	10.1021/acsnano.7b07874	Macrophage-Specific in Vivo Gene Editing Using Cationic Lipid-Assisted Polymeric Nanoparticles.	The CRISPR/Cas9 gene editing technology holds promise for the treatment of multiple diseases. However, the inability to perform specific gene editing in targeted tissues and cells, which may cause off-target effects, is one of the critical bottlenecks for therapeutic application of CRISPR/Cas9. Herein, macrophage-specific promoter-driven Cas9 expression plasmids (pM458 and pM330) were constructed…	eng	ACS nano	ACS Nano	101313589	2018	Feb		12	2	994-1005	Internet	Ying-Li Luo	Luo, YL; Xu, CF; Li, HJ; Cao, ZT; Liu, J; Wang, JL; Du, XJ; Yang, XZ; Gu, Z; Wang, J	School of Life Sciences, University of Science and Technology of China , Hefei, Anhui 230027, People's Republic of China.	click here	click here	click here	click here	journal
29499925	10.1016/j.omtn.2017.11.001	High Efficiency Gene Correction in Hematopoietic Cells by Donor-Template-Free CRISPR/Cas9 Genome Editing.	The CRISPR/Cas9 prokaryotic adaptive immune system and its swift repurposing for genome editing enables modification of any prespecified genomic sequence with unprecedented accuracy and efficiency, including targeted gene repair. We used the CRISPR/Cas9 system for targeted repair of patient-specific point mutations in the Cytochrome b-245 heavy chain gene (CYBB), whose inactivation causes chronic…	eng	Molecular therapy. Nucleic acids	Mol Ther Nucleic Acids	101581621	2018	Mar		10		1-8	Print	Duran Sürün	Sürün, D; Schwäble, J; Tomasovic, A; Ehling, R; Stein, S; Kurrle, N; von Melchner, H; Schnütgen, F	Department of Molecular Hematology, Goethe University Medical School, 60590 Frankfurt am Main, Germany; LOEWE Center for Cell and Gene Therapy, Goethe University Medical School, 60590 Frankfurt am Main, Germany. Electronic address: d.sueruen@med.uni-frankfurt.de.	click here	click here	click here	click here	journal
29269023	10.1016/j.molp.2017.12.006	Rice Interploidy Crosses Disrupt Epigenetic Regulation, Gene Expression, and Seed Development.	Seed development in angiosperms requires a 2:1 maternal-to-paternal genome ratio (2m:1p) in the endosperm. When the ratio is disrupted, the seed development is impaired. Rice interploidy crosses result in endosperm failures, but the underlying molecular mechanisms remain unclear. Here, we report that the defective endosperm in rice interploidy crosses was associated with nonadditive expression of…	eng	Molecular plant	Mol Plant	101465514	2018	Feb		11	2	300-314	Internet	Limei Wang	Wang, L; Yuan, J; Ma, Y; Jiao, W; Ye, W; Yang, DL; Yi, C; Chen, ZJ	State Key Laboratory of Crop Genetics and Germplasm Enhancement, Nanjing Agricultural University, 1 Weigang Road, Nanjing 210095, China.	click here	click here	click here	click here	journal
28882870	10.1161/ATVBAHA.117.310023	CRISPR/Cas9-Mediated Gene Editing in Human iPSC-Derived Macrophage Reveals Lysosomal Acid Lipase Function in Human Macrophages-Brief Report.	To gain mechanistic insights into the role ofLIPA(lipase A), the gene encoding LAL (lysosomal acid lipase) protein, in human macrophages.We used CRISPR (clustered regularly interspaced short palindromic repeats)/Cas9 (CRISPR-associated protein 9) technology to knock outLIPAin human induced pluripotent stem cells and then differentiate to macrophage (human-induced pluripotent stem cells-derived ma…	eng	Arteriosclerosis, thrombosis, and vascular biology	Arterioscler Thromb Vasc Biol	9505803	2017	Nov		37	11	2156-2160	Internet	Hanrui Zhang	Zhang, H; Shi, J; Hachet, MA; Xue, C; Bauer, RC; Jiang, H; Li, W; Tohyama, J; Millar, J; Billheimer, J; Phillips, MC; Razani, B; Rader, DJ; Reilly, MP	From the Division of Cardiology, Department of Medicine, Columbia University Medical Center, New York (H.Z., J.S., M.A.H., C.X., R.C.B., M.P.R.); Irving Institute for Clinical and Translational Research, Columbia University, New York (H.J., M.P.R.); Cardiovascular Institute, Perelman School of Medicine (W.L.), Division of Translational Medicine and Human Genetics, Departments of Genetics and Medi…	click here	click here	click here	click here	journal
29292253		[Construction of a stable 4.1R gene knockout cell model in RAW264.7 cells using CRISPR/Cas9 technique].	To construct a cell model of 4.1R gene knockout in murine macrophage cell line RAW264.7 using CRISPR/Cas9 technique.Three high?grade small?guide RNAs (sgRNAs) that could specifically identify 4.1R gene were synthesized and inserted into lentiCRISPRv2 plasmid. RAW264.7 cells were infected with sgRNA?Cas9 lentivirus from 293T cells transfected with the recombinant sgRNA?lentiCRISPRv2 plasmid, and t…	chi	Nan fang yi ke da xue xue bao = Journal of Southern Medical University	Nan Fang Yi Ke Da Xue Xue Bao	101266132	2017	Dec		37	12	1609-1614	Print	Cheng-Bo Wang	Wang, CB; Kang, QZ; Ding, C; Li, YW; Liang, TT; Zhang, CL; Wang, W; Wang, T	School of Life Sciences, Zhengzhou University, Zhengzhou 45000, China. E-mail: cbwang95@126.com.	click here	click here	click here	click here	journal
28566761	10.1038/s41598-017-02927-2	Proof-of-Concept Gene Editing for the Murine Model of Inducible Arginase-1 Deficiency.	Arginase-1 deficiency in humans is a rare genetic disorder of metabolism resulting from a loss of arginase-1, leading to impaired ureagenesis, hyperargininemia and neurological deficits. Previously, we generated a tamoxifen-inducible arginase-1 deficient mouse model harboring a deletion of Arg1 exons 7 and 8 that leads to similar biochemical defects, along with a wasting phenotype and death withi…	eng	Scientific reports	Sci Rep	101563288	2017	May		7	1	2585	Internet	Yuan Yan Sin	Sin, YY; Price, PR; Ballantyne, LL; Funk, CD	Department of Biomedical and Molecular Sciences, Queen's University, Kingston, Ontario, Canada.	click here	click here	click here	click here	journal
29163439	10.3389/fmicb.2017.02156	Phosphomannosylation and the Functional Analysis of the ExtendedCandida albicans MNN4-Like Gene Family.	Phosphomannosylation is a modification of cell wall proteins that occurs in some species of yeast-like organisms, including the human pathogenCandida albicans. These modified mannans confer a negative charge to the wall, which is important for the interactions with phagocytic cells of the immune systems and cationic antimicrobial peptides. InSaccharomyces cerevisiae, the synthesis of phosphomanna…	eng	Frontiers in microbiology	Front Microbiol	101548977	2017			8		2156	Print	Roberto J González-Hernández	González-Hernández, RJ; Jin, K; Hernández-Chávez, MJ; Díaz-Jiménez, DF; Trujillo-Esquivel, E; Clavijo-Giraldo, DM; Tamez-Castrellón, AK; Franco, B; Gow, NAR; Mora-Montes, HM	División de Ciencias Naturales y Exactas, Departamento de Biología, Universidad de Guanajuato, Guanajuato, Mexico.	click here	click here	click here	click here	journal
29210506	10.1111/jipb.12620	Generation of new glutinous rice by CRISPR/Cas9-targeted mutagenesis of the Waxy gene in elite rice varieties.	In rice, amylose content (AC) is controlled by a single dominant Waxy gene. We used Clustered Regularly Interspaced Short Palindromic Repeats (CRISPR)/CRISPR-associated 9 (Cas9) to introduce a loss-of-function mutation into the Waxy gene in two widely cultivated elite japonica varieties. Our results show that mutations in the Waxy gene reduce AC and convert the rice into glutinous ones without af…	eng	Journal of integrative plant biology	J Integr Plant Biol	101250502	2017	Dec					Internet	Jinshan Zhang	Zhang, J; Zhang, H; Botella, JR; Zhu, JK	Shanghai Center for Plant Stress Biology, and Center for Excellence in Molecular Plant Sciences, Chinese Academy of Sciences, Shanghai 201602, China.	click here	click here	click here	click here	journal
28560324	10.1126/sciadv.1601910	CRISPR/Cas9 gene drives in genetically variable and nonrandomly mating wild populations.	Synthetic gene drives based on CRISPR/Cas9 have the potential to control, alter, or suppress populations of crop pests and disease vectors, but it is unclear how they will function in wild populations. Using genetic data from four populations of the flour beetleTribolium castaneum, we show that most populations harbor genetic variants in Cas9 target sites, some of which would render them immune t…	eng	Science advances	Sci Adv	101653440	2017	May		3	5	e1601910	Internet	Douglas W Drury	Drury, DW; Dapper, AL; Siniard, DJ; Zentner, GE; Wade, MJ	Department of Biology, Indiana University, Bloomington, IN 47405, USA.	click here	click here	click here	click here	journal
28475701	10.1167/iovs.16-21287	CRISPR/Cas9-Mediated Mutation of αA-Crystallin Gene Induces Congenital Cataracts in Rabbits.	The present study aimed to investigate the role of the αA-crystallin gene in inducing congenital cataracts in rabbits and to construct a novel animal model for characterization and pathologic analysis of congenital cataracts for future research.We generated αA-crystallin gene knockout rabbits with congenital cataracts by coinjection of Cas9 mRNA and sgRNA into zygotes. Cataract phenotypes were in…	eng	Investigative ophthalmology & visual science	Invest Ophthalmol Vis Sci	7703701	2017	05		58	6	BIO34-BIO41	Internet	Lin Yuan	Yuan, L; Yao, H; Xu, Y; Chen, M; Deng, J; Song, Y; Sui, T; Wang, Y; Huang, Y; Li, Z; Lai, L	Jilin Provincial Key Laboratory of Animal Embryo Engineering, Institute of Zoonosis, College of Animal Science, Jilin University, Changchun, China.	click here	click here	click here	click here	journal
27883055	10.1038/srep37721	GapmeR cellular internalization by macropinocytosis induces sequence-specific gene silencing in human primary T-cells.	Post-transcriptional gene silencing holds great promise in discovery research for addressing intricate biological questions and as therapeutics. While various gene silencing approaches, such as siRNA and CRISPR-Cas9 techniques, are available, these cannot be effectively applied to "hard-to-transfect" primary T-lymphocytes. The locked nucleic acid-conjugated chimeric antisense oligonucleotide, cal…	eng	Scientific reports	Sci Rep	101563288	2016	Nov		6		37721	Internet	Mobashar Hussain Urf Turabe Fazil	Fazil, MH; Ong, ST; Chalasani, ML; Low, JH; Kizhakeyil, A; Mamidi, A; Lim, CF; Wright, GD; Lakshminarayanan, R; Kelleher, D; Verma, NK	Lymphocyte Signalling Research Laboratory, Lee Kong Chian School of Medicine, Nanyang Technological University, 636921, Singapore.	click here	click here	click here	click here	journal
25246539	10.1073/pnas.1406749111	Precisely modulated pathogenicity island interference with late phage gene transcription.	Having gone to great evolutionary lengths to develop resistance to bacteriophages, bacteria have come up with resistance mechanisms directed at every aspect of the bacteriophage life cycle. Most genes involved in phage resistance are carried by plasmids and other mobile genetic elements, including bacteriophages and their relatives. A very special case of phage resistance is exhibited by the high…	eng	Proceedings of the National Academy of Sciences of the United States of America	Proc Natl Acad Sci U S A	7505876	2014	Oct		111	40	14536-41	Internet	Geeta Ram	Ram, G; Chen, J; Ross, HF; Novick, RP	Skirball Institute Program in Molecular Pathogenesis and Departments of Microbiology and Medicine, New York University Medical Center, New York, NY 10016.	click here	click here	click here	click here	journal
29440578	10.1128/mBio.02406-17	CRISPR-Cas-Mediated Phage Resistance Enhances Horizontal Gene Transfer by Transduction.	A powerful contributor to prokaryotic evolution is horizontal gene transfer (HGT) through transformation, conjugation, and transduction, which can be advantageous, neutral, or detrimental to fitness. Bacteria and archaea control HGT and phage infection through CRISPR-Cas (clustered regularly interspaced short palindromic repeats-CRISPR-associated proteins) adaptive immunity. Although the benefits…	eng	mBio	MBio	101519231	2018	Feb		9	1		Internet	Bridget N J Watson	Watson, BNJ; Staals, RHJ; Fineran, PC	Department of Microbiology and Immunology, University of Otago, Dunedin, New Zealand.	click here	click here	click here	click here	journal
29535386	10.1038/s41598-018-22667-1	Highly efficient heritable targeted deletions of gene clusters and non-coding regulatory regions in Arabidopsis using CRISPR/Cas9.	Genome editing using CRISPR/Cas9 is considered the best instrument for genome engineering in plants. This methodology is based on the nuclease activity of Cas9 that is guided to specific genome sequences by single guide RNAs (sgRNAs) thus enabling researchers to engineer simple mutations or large chromosomal deletions. Current methodologies for targeted genome editing in plants using CRISPR/Cas9 …	eng	Scientific reports	Sci Rep	101563288	2018	Mar		8	1	4443	Internet	Julius Durr	Durr, J; Papareddy, R; Nakajima, K; Gutierrez-Marcos, J	School of Life Sciences, University of Warwick, Coventry, CV4 7AL, UK.	click here	click here	click here	click here	journal
29311279	10.1128/JB.00575-17	A Robust CRISPR Interference Gene Repression System in Pseudomonas.	Pseudomonas spp. are widely used model organisms in different areas of research. Despite the relevance ofPseudomonasin many applications, the use of protein depletion tools in this host remains limited. Here, we developed the CRISPR interference system for gene repression inPseudomonasspp. using a nuclease-nullStreptococcus pasteurianusCas9 variant (dead Cas9, or dCas9). We demonstrate a robust a…	eng	Journal of bacteriology	J Bacteriol	2985120R	2018	Apr		200	7		Internet	Sue Zanne Tan	Tan, SZ; Reisch, CR; Prather, KLJ	Department of Chemical Engineering, Massachusetts Institute of Technology, Cambridge, Massachusetts, USA.	click here	click here	click here	click here	journal
29206320	10.1111/tpj.13796	A farnesyl pyrophosphate synthase gene expressed in pollen functions in S-RNase-independent unilateral incompatibility.	Multiple independent and overlapping pollen rejection pathways contribute to unilateral interspecific incompatibility (UI). In crosses between tomato species, pollen rejection usually occurs when the female parent is self-incompatible (SI) and the male parent self-compatible (SC) (the 'SI × SC rule'). Additional, as yet unknown, UI mechanisms are independent of self-incompatibility and contribute…	eng	The Plant journal : for cell and molecular biology	Plant J	9207397	2018	Feb		93	3	417-430	Internet	Xiaoqiong Qin	Qin, X; Li, W; Liu, Y; Tan, M; Ganal, M; Chetelat, RT	Department of Plant Sciences (ms #3), One Shields Ave., University of California, Davis, CA, 95616, USA.	click here	click here	click here	click here	journal
28264583	10.1089/hum.2017.005	CRISPR-Mediated Knockout of Cybb in NSG Mice Establishes a Model of Chronic Granulomatous Disease for Human Stem-Cell Gene Therapy Transplants.	Chronic granulomatous disease (CGD) is characterized by defects in the production of microbicidal reactive oxygen species (ROS) by phagocytes. Testing of gene and cell therapies for the treatment of CGD in human hematopoietic cells requires preclinical transplant models. The use of the lymphocyte-deficient NOD.Cg-PrkdcscidIl2rgtm1Wjl/SzJ (NSG) mouse strain for human hematopoietic cell xenografts …	eng	Human gene therapy	Hum Gene Ther	9008950	2017	Jul		28	7	565-575	Internet	Colin L Sweeney	Sweeney, CL; Choi, U; Liu, C; Koontz, S; Ha, SK; Malech, HL	1 Laboratory of Host Defenses, National Institute of Allergy and Infectious Diseases , National Institutes of Health, Bethesda, Maryland.	click here	click here	click here	click here	journal
28933359	10.3390/diseases5010006	A Prospective Treatment Option for Lysosomal Storage Diseases: CRISPR/Cas9 Gene Editing Technology for Mutation Correction in Induced Pluripotent Stem Cells.	Ease of design, relatively low cost and a multitude of gene-altering capabilities have all led to the adoption of the sophisticated and yet simple gene editing system: clustered regularly interspaced short palindromic repeats/CRISPR-associated protein 9 (CRISPR/Cas9). The CRISPR/Cas9 system holds promise for the correction of deleterious mutations by taking advantage of the homology directed repa…	eng	Diseases (Basel, Switzerland)	Diseases	101636232	2017	Feb		5	1		Print	Chloe L Christensen	Christensen, CL; Choy, FYM	Department of Biology, Centre for Biomedical Research, University of Victoria, 3800 Finnerty Rd., Victoria, BC V8P 5C2, Canada. chloechr@uvic.ca.	click here	click here	click here	click here	journal
29259527		Potential of Gene Editing and Induced Pluripotent Stem Cells (iPSCs) in Treatment of Retinal Diseases .	The advent of gene editing has introduced the ability to make changes to the genome of cells, thus allowing for correction of genetic mutations in patients with monogenic diseases. Retinal diseases are particularly suitable for the application of this new technology because many retinal diseases, such as Stargardt disease, retinitis pigmentosa (RP), and Leber congenital amaurosis (LCA), are monog…	eng	The Yale journal of biology and medicine	Yale J Biol Med	0417414	2017	Dec		90	4	635-642	Internet	Katherine Chuang	Chuang, K; Fields, MA; Del Priore, LV	Yale School of Medicine, Department of Ophthalmology and Visual Science, New Haven, CT.	click here	click here	click here	click here	journal
28270364	10.1016/j.jaci.2017.01.007	New frontiers in the therapy of primary immunodeficiency: From gene addition to gene editing.	The most severe primary immune deficiency diseases (PIDs) have been successfully treated with allogeneic hematopoietic stem cell transplantation for more than 4 decades. However, such transplantations have the best outcomes when there is a well-matched donor available because immune complications, such as graft-versus-host disease, are greater without a matched sibling donor. Gene therapy has bee…	eng	The Journal of allergy and clinical immunology	J Allergy Clin Immunol	1275002	2017	Mar		139	3	726-732	Internet	Donald B Kohn	Kohn, DB; Kuo, CY	Department of Pediatrics, David Geffen School of Medicine, University of California, Los Angeles, Calif; Department of Microbiology, Immunology & Molecular Genetics, David Geffen School of Medicine, University of California, Los Angeles, Calif; Eli & Edythe Broad Center of Stem Cell Research & Regenerative Medicine, David Geffen School of Medicine, University of California, Los Angeles, Calif; Jo…	click here	click here	click here	click here	journal
28945022		[Progress of gene editing technologies and prospect in traditional Chinese medicine].	Gene editing is a kind of technologies that makes precise modification to the genome. It can be used to knock out/in and replace the specific DNA fragment, and make accurate gene editing on the genome level. The essence of the technique is the DNA sequence change with use of non homologous end link repair and homologous recombination repair, combined with specific DNA target recognition and endon…	chi	Zhongguo Zhong yao za zhi = Zhongguo zhongyao zazhi = China journal of Chinese materia medica	Zhongguo Zhong Yao Za Zhi	8913656	2017	Jan		42	1	34-40	Print	Yan-Yan Ma	Ma, YY; Li, JZ; Gao, EN; Qian, D; Zhong, JY; Liu, CZ	Medical Experimental Centre, China Academy of Chinese Medical Sciences, Beijing 100700, China.	click here	click here	click here	click here	journal
28806273	10.1097/MOH.0000000000000385	The changing landscape of gene editing in hematopoietic stem cells: a step towards Cas9 clinical translation.	Since the discovery two decades ago that programmable endonucleases can be engineered to modify human cells at single nucleotide resolution, the concept of genome editing was born. Now these technologies are being applied to therapeutically relevant cell types, including hematopoietic stem cells (HSC), which possess the power to repopulate an entire blood and immune system. The purpose of this re…	eng	Current opinion in hematology	Curr Opin Hematol	9430802	2017	Nov		24	6	481-488	Internet	Daniel P Dever	Dever, DP; Porteus, MH	Department of Pediatrics, Stanford University, Stanford, California, USA.	click here	click here	click here	click here	journal
28674816	10.1007/978-1-4939-7108-4_20	CRISPR-Cas9-Mediated Gene Editing in Mouse Spermatogonial Stem Cells.	Precise genome editing is a powerful tool for analysis of gene function. However, in spermatogonial stem cells (SSCs), this still remains a big challenge mainly due to low efficiency and complexity of currently available gene editing techniques. The CRISPR-Cas9 system from bacteria has been applied to modifying genome in different species at a very high efficiency and specificity. Here we describ…	eng	Methods in molecular biology (Clifton, N.J.)	Methods Mol Biol	9214969	2017			1622		293-305	Internet	Yinghua Wang	Wang, Y; Ding, Y; Li, J	State Key Laboratory of Molecular Biology, Shanghai Key Laboratory of Molecular Andrology, CAS Center for Excellence in Molecular Cell Science, Shanghai Institute of Biochemistry and Cell Biology, Chinese Academy of Sciences, University of Chinese Academy of Sciences, 320 Yueyang Road, Shanghai, 200031, China.	click here	click here	click here	click here	journal
28077679	10.1126/scitranslmed.aah3480	CRISPR-Cas9 gene repair of hematopoietic stem cells from patients with X-linked chronic granulomatous disease.	Gene repair of CD34+hematopoietic stem and progenitor cells (HSPCs) may avoid problems associated with gene therapy, such as vector-related mutagenesis and dysregulated transgene expression. We used CRISPR (clustered regularly interspaced short palindromic repeat)/Cas9 (CRISPR-associated 9) to repair a mutation in the CYBB gene of CD34+HSPCs from patients with the immunodeficiency disorder X-link…	eng	Science translational medicine	Sci Transl Med	101505086	2017	Jan		9	372		Internet	Suk See De Ravin	De Ravin, SS; Li, L; Wu, X; Choi, U; Allen, C; Koontz, S; Lee, J; Theobald-Whiting, N; Chu, J; Garofalo, M; Sweeney, C; Kardava, L; Moir, S; Viley, A; Natarajan, P; Su, L; Kuhns, D; Zarember, KA; Peshwa, MV; Malech, HL	Laboratory of Host Defenses, National Institute of Allergy and Infectious Diseases, National Institutes of Health, Bethesda, MD 20892, USA. sderavin@niaid.nih.gov hmalech@nih.gov.	click here	click here	click here	click here	journal
29297312	10.1186/s12863-017-0582-7	Generation of megabase-scale deletions, inversions and duplications involving the Contactin-6 gene in mice by CRISPR/Cas9 technology.	Copy Number Variation (CNV) of the human CNTN6 gene (encoding the contactin-6 protein), caused by deletions or duplications, is responsible for severe neurodevelopmental impairments, often in combination with facial dysmorphias. Conversely, deleterious point mutations of this gene do not show any clinical phenotypes. The aim of this study is to generate mice carrying large deletions, duplications…	eng	BMC genetics	BMC Genet	100966978	2017	Dec		18	Suppl 1	112	Internet	Alexei N Korablev	Korablev, AN; Serova, IA; Serov, OL	Department of Molecular Mechanisms of Development, Institute of Cytology and Genetics, Russia Academy of Sciences, Siberian Branch, Novosibirsk, 630090, Russia.	click here	click here	click here	click here	journal
29077398	10.1021/acssynbio.7b00246	Control of Adipogenic Differentiation in Mesenchymal Stem Cells via Endogenous Gene Activation Using CRISPR-Cas9.	Mesenchymal stem cells (MSCs) are of interest in regenerative medicine owing to their multilineage differentiation and self-renewal properties. Understanding the in vivo differentiation process is necessary for clinical applications including cell therapy and transplantation. This remains challenging owing to the lack of induction methods that imitate the natural programming process. Endogenous g…	eng	ACS synthetic biology	ACS Synth Biol	101575075	2017	12		6	12	2191-2197	Internet	Yuichi Furuhata	Furuhata, Y; Nihongaki, Y; Sato, M; Yoshimoto, K	Department of Computational Biology and Medical Sciences, Graduate School of Frontier Sciences, The University of Tokyo , Shirokanedai 4-6-1, Minato-ku, Tokyo 108-8639, Japan.	click here	click here	click here	click here	journal
29021165	10.1126/scitranslmed.aan0820	Preclinical modeling highlights the therapeutic potential of hematopoietic stem cell gene editing for correction of SCID-X1.	Targeted genome editing in hematopoietic stem/progenitor cells (HSPCs) is an attractive strategy for treating immunohematological diseases. However, the limited efficiency of homology-directed editing in primitive HSPCs constrains the yield of corrected cells and might affect the feasibility and safety of clinical translation. These concerns need to be addressed in stringent preclinical models an…	eng	Science translational medicine	Sci Transl Med	101505086	2017	Oct		9	411		Internet	Giulia Schiroli	Schiroli, G; Ferrari, S; Conway, A; Jacob, A; Capo, V; Albano, L; Plati, T; Castiello, MC; Sanvito, F; Gennery, AR; Bovolenta, C; Palchaudhuri, R; Scadden, DT; Holmes, MC; Villa, A; Sitia, G; Lombardo, A; Genovese, P; Naldini, L	San Raffaele Telethon Institute for Gene Therapy, 20132 Milan, Italy.	click here	click here	click here	click here	journal
28918053	10.1016/j.omtn.2017.08.003	USH2A Gene Editing Using the CRISPR System.	Usher syndrome (USH) is a rare autosomal recessive disease and the most common inherited form of combined visual and hearing impairment. Up to 13 genes are associated with this disorder, with USH2A being the most prevalent, due partially to the recurrence rate of the c.2299delG mutation. Excluding hearing aids or cochlear implants for hearing impairment, there are no medical solutions available t…	eng	Molecular therapy. Nucleic acids	Mol Ther Nucleic Acids	101581621	2017	Sep		8		529-541	Print	Carla Fuster-García	Fuster-García, C; García-García, G; González-Romero, E; Jaijo, T; Sequedo, MD; Ayuso, C; Vázquez-Manrique, RP; Millán, JM; Aller, E	Grupo de Investigación en Biomedicina Molecular, Celular y Genómica, Instituto de Investigación Sanitaria La Fe (IIS La Fe), Valencia, Spain.	click here	click here	click here	click here	journal
29100008	10.1016/j.stem.2017.10.008	At Last: Gene Editing in Human Embryos to Understand Human Development.	Our understanding of early human development is typically based on inference from animal models, which may not fully recapitulate human embryonic features. As proof of concept, Fogarty et al. (2017) used CRISPR/Cas9 to genetically ablate the OCT4 gene in human preimplantation embryos and found key differences from its function in model systems.	eng	Cell stem cell	Cell Stem Cell	101311472	2017	Nov		21	5	564-565	Internet	Albert Ruzo	Ruzo, A; Brivanlou, AH	Laboratory of Stem Cell Biology and Molecular Embryology, The Rockefeller University, New York, NY 10065, USA.	click here	click here	click here	click here	journal
28783728	10.1038/nature23305	Correction of a pathogenic gene mutation in human embryos.	Genome editing has potential for the targeted correction of germline mutations. Here we describe the correction of the heterozygous MYBPC3 mutation in human preimplantation embryos with precise CRISPR-Cas9-based targeting accuracy and high homology-directed repair efficiency by activating an endogenous, germline-specific DNA repair response. Induced double-strand breaks (DSBs) at the mutant pater…	eng	Nature	Nature	0410462	2017	08		548	7668	413-419	Internet	Hong Ma	Ma, H; Marti-Gutierrez, N; Park, SW; Wu, J; Lee, Y; Suzuki, K; Koski, A; Ji, D; Hayama, T; Ahmed, R; Darby, H; Van Dyken, C; Li, Y; Kang, E; Park, AR; Kim, D; Kim, ST; Gong, J; Gu, Y; Xu, X; Battaglia, D; Krieg, SA; Lee, DM; Wu, DH; Wolf, DP; Heitner, SB; Belmonte, JCI; Amato, P; Kim, JS; Kaul, S; Mitalipov, S	Center for Embryonic Cell and Gene Therapy, Oregon Health &Science University, 3303 Southwest, Bond Avenue, Portland, Oregon 97239, USA.	click here	click here	click here	click here	journal
28478103	10.1016/j.ymeth.2017.04.024	Towards mastering CRISPR-induced gene knock-in in plants: Survey of key features and focus on the model Physcomitrella patens.	Beyond its predominant role in human and animal therapy, the CRISPR-Cas9 system has also become an essential tool for plant research and plant breeding. Agronomic applications rely on the mastery of gene inactivation and gene modification. However, if the knock-out of genes by non-homologous end-joining (NHEJ)-mediated repair of the targeted double-strand breaks (DSBs) induced by the CRISPR-Cas9 …	eng	Methods (San Diego, Calif.)	Methods	9426302	2017	May		121-122		103-117	Internet	Cécile Collonnier	Collonnier, C; Guyon-Debast, A; Maclot, F; Mara, K; Charlot, F; Nogué, F	INRA Centre de Versailles-Grignon, IJPB (UMR1318) - route de St-Cyr, 78026 Versailles cedex, France. Electronic address: cecile.collonnier@inra.fr.	click here	click here	click here	click here	journal
28349358	10.1007/s00299-017-2118-z	CRISPR-Cas9 and CRISPR-Cpf1 mediated targeting of a stomatal developmental gene EPFL9 in rice.	CRISPR-Cas9/Cpf1 system with its unique gene targeting efficiency, could be an important tool for functional study of early developmental genes through the generation of successful knockout plants. The introduction and utilization of systems biology approaches have identified several genes that are involved in early development of a plant and with such knowledge a robust tool is required for the …	eng	Plant cell reports	Plant Cell Rep	9880970	2017	May		36	5	745-757	Internet	Xiaojia Yin	Yin, X; Biswal, AK; Dionora, J; Perdigon, KM; Balahadia, CP; Mazumdar, S; Chater, C; Lin, HC; Coe, RA; Kretzschmar, T; Gray, JE; Quick, PW; Bandyopadhyay, A	International Rice Research Institute, DAPO, 7777, Metro Manila, Philippines.	click here	click here	click here	click here	journal
28584922	10.1007/s00299-017-2158-4	Deletion of a target gene in Indica rice via CRISPR/Cas9.	Using CRISPR/Cas9, we successfully deleted large fragments of the yield-related gene DENSE AND ERECT PANICLE1 in Indica rice at relatively high frequency and generated gain-of-function dep1 mutants. CRISPR (clustered regularly interspaced short palindromic repeats)/Cas9 is a rapidly developing technology used to produce gene-specific modifications in both mammalian and plant systems. Most CRISPR-…	eng	Plant cell reports	Plant Cell Rep	9880970	2017	Aug		36	8	1333-1343	Internet	Ying Wang	Wang, Y; Geng, L; Yuan, M; Wei, J; Jin, C; Li, M; Yu, K; Zhang, Y; Jin, H; Wang, E; Chai, Z; Fu, X; Li, X	Syngenta Biotechnology China, No. 25, Life Science Park Road, Zhongguancun Life Science Park, Beijing, 102206, China.	click here	click here	click here	click here	journal
28371200	10.1111/pbi.12733	Engineering canker-resistant plants through CRISPR/Cas9-targeted editing of the susceptibility gene CsLOB1 promoter in citrus.	Citrus canker, caused by Xanthomonas citri subsp. citri (Xcc), is severely damaging to the global citrus industry. Targeted editing of host disease-susceptibility genes represents an interesting and potentially durable alternative in plant breeding for resistance. Here, we report improvement of citrus canker resistance through CRISPR/Cas9-targeted modification of the susceptibility gene CsLOB1 pr…	eng	Plant biotechnology journal	Plant Biotechnol J	101201889	2017	Dec		15	12	1509-1519	Internet	Aihong Peng	Peng, A; Chen, S; Lei, T; Xu, L; He, Y; Wu, L; Yao, L; Zou, X	Citrus Research Institute, Chinese Academy of Agricultural Sciences and National Center for Citrus Variety Improvement, Chongqing, China.	click here	click here	click here	click here	journal
28667273	10.1038/s41598-017-04556-1	Natural and induced loss of function mutations in SlMBP21 MADS-box gene led to jointless-2 phenotype in tomato.	Abscission is the mechanism by which plants disconnect unfertilized flowers, ripe fruits, senescent or diseased organs from the plant. In tomato, pedicel abscission is an important agronomic factor that controls yield and post-harvest fruit quality. Two non-allelic mutations, jointless (j) and jointless-2 (j-2), controlling pedicel abscission zone formation have been documented but only j-2 has b…	eng	Scientific reports	Sci Rep	101563288	2017	Jun		7	1	4402	Internet	Maria Victoria Gomez Roldan	Roldan, MVG; Périlleux, C; Morin, H; Huerga-Fernandez, S; Latrasse, D; Benhamed, M; Bendahmane, A	Institute of Plant Sciences Paris-Saclay (IPS2), CNRS, INRA, University Paris-Sud, University of Evry, University Paris-Diderot, Sorbonne Paris-Cite, University of Paris-Saclay, 91405, Orsay, France.	click here	click here	click here	click here	journal
28299429	10.1007/s00299-017-2123-2	Anther-preferential expressing gene PMR is essential for the mitosis of pollen development in rice.	Phenotype identification, expression examination, and function prediction declared that the anther-preferential expressing gene PMR may participate in regulation of male gametophyte development in rice. Male germline development in flowering plants produces the pair of sperm cells for double fertilization and the pollen mitosis is a key process of it. Although the structural features of male game…	eng	Plant cell reports	Plant Cell Rep	9880970	2017	Jun		36	6	919-931	Internet	Yaqin Liu	Liu, Y; Xu, Y; Ling, S; Liu, S; Yao, J	College of Life Science and Technology, Huazhong Agricultural University, Wuhan, 430070, China.	click here	click here	click here	click here	journal
27815670	10.1007/s11103-016-0558-4	Novel rice mutants overexpressing the brassinosteroid catabolic gene CYP734A4.	Moderate overexpression of CYP734A4 improves grain number per main panicle and seed setting rate. Brassinosteroid (BR) homeostasis and signaling are crucial for plant growth and development. CYP734A genes encode cytochrome P450 monooxygenases that control the level of bioactive BRs by degrading BRs. However, fertile plants overexpressing CYP734As have not been reported in rice. Here, we isolated …	eng	Plant molecular biology	Plant Mol Biol	9106343	2017	Jan		93	1-2	197-208	Internet	Wenjing Qian	Qian, W; Wu, C; Fu, Y; Hu, G; He, Z; Liu, W	State Key Laboratory of Rice Biology, China National Rice Research Institute, Hangzhou, 310006, China.	click here	click here	click here	click here	journal
29036337	10.1093/pcp/pcx139	A Collection of Mutants for CLE-Peptide-Encoding Genes in Arabidopsis Generated by CRISPR/Cas9-Mediated Gene Targeting.	The ligand-receptor-mediated intercellular communication system plays important roles in coordinating developmental and physiological events in multicellular organisms. In plants, CLAVATA3/EMBRYO SURROUNDING REGION (CLE) peptides and their cognate receptors are thought to be involved in various aspects of the plant life cycle. Although the importance of this communication is broadly recognized, m…	eng	Plant & cell physiology	Plant Cell Physiol	9430925	2017	Nov		58	11	1848-1856	Internet	Yasuka L Yamaguchi	Yamaguchi, YL; Ishida, T; Yoshimura, M; Imamura, Y; Shimaoka, C; Sawa, S	Graduate School of Science and Technology, Kumamoto University, Kumamoto 860-8555, Japan.	click here	click here	click here	click here	journal
27368642	10.1111/pbi.12596	CRISPR-Cas9-mediated efficient directed mutagenesis and RAD51-dependent and RAD51-independent gene targeting in the moss Physcomitrella patens.	The ability to address the CRISPR-Cas9 nuclease complex to any target DNA using customizable single-guide RNAs has now permitted genome engineering in many species. Here, we report its first successful use in a nonvascular plant, the moss Physcomitrella patens. Single-guide RNAs (sgRNAs) were designed to target an endogenous reporter gene, PpAPT, whose inactivation confers resistance to 2-fluoroa…	eng	Plant biotechnology journal	Plant Biotechnol J	101201889	2017	Jan		15	1	122-131	Internet	Cécile Collonnier	Collonnier, C; Epert, A; Mara, K; Maclot, F; Guyon-Debast, A; Charlot, F; White, C; Schaefer, DG; Nogué, F	INRA Centre de Versailles-Grignon, IJPB (UMR1318), Versailles Cedex, France.	click here	click here	click here	click here	journal
27862889	10.1111/pbi.12663	Significant enhancement of fatty acid composition in seeds of the allohexaploid, Camelina sativa, using CRISPR/Cas9 gene editing.	The CRISPR/Cas9 nuclease system is a powerful and flexible tool for genome editing, and novel applications of this system are being developed rapidly. Here, we used CRISPR/Cas9 to target the FAD2 gene in Arabidopsis thaliana and in the closely related emerging oil seed plant, Camelina sativa, with the goal of improving seed oil composition. We successfully obtained Camelina seeds in which oleic a…	eng	Plant biotechnology journal	Plant Biotechnol J	101201889	2017	May		15	5	648-657	Internet	Wen Zhi Jiang	Jiang, WZ; Henry, IM; Lynagh, PG; Comai, L; Cahoon, EB; Weeks, DP	Department of Biochemistry and Center for Plant Science Innovation, University of Nebraska, Lincoln, NE, USA.	click here	click here	click here	click here	journal
28584067	10.1104/pp.17.00426	CRISPR-Cas9 Targeted Mutagenesis Leads to Simultaneous Modification of Different Homoeologous Gene Copies in Polyploid Oilseed Rape (Brassica napus).	In polyploid species, altering a trait by random mutagenesis is highly inefficient due to gene redundancy. We have stably transformed tetraploid oilseed rape (Brassica napus) with a CRISPR-Cas9 construct targeting twoALCATRAZ(ALC) homoeologs.ALCis involved in valve margin development and, thus, contributes to seed shattering from mature fruits. Knocking outALCwould increase shatter resistance to …	eng	Plant physiology	Plant Physiol	0401224	2017	Jun		174	2	935-942	Internet	Janina Braatz	Braatz, J; Harloff, HJ; Mascher, M; Stein, N; Himmelbach, A; Jung, C	Plant Breeding Institute, Christian-Albrechts-University of Kiel, 24098 Kiel, Germany (J.B., H.-J.H., C.J.).	click here	click here	click here	click here	journal
28439853	10.1007/978-1-4939-7003-2_1	CRISPR/Cas-Mediated In Planta Gene Targeting.	The recent emergence of the CRISPR/Cas system has boosted the possibilities for precise genome engineering approaches throughout all kingdoms of life. The most common application for plants is targeted mutagenesis, whereby a Cas9-mediated DNA double-strand break (DSB) is repaired by mutagenic nonhomologous end joining (NHEJ). However, the site-specific alteration of a genomic sequence or integrat…	eng	Methods in molecular biology (Clifton, N.J.)	Methods Mol Biol	9214969	2017			1610		3-11	Internet	Simon Schiml	Schiml, S; Fauser, F; Puchta, H	Botanical Institute II, Karlsruhe Institute of Technology, 6980, 76049, Karlsruhe, Germany.	click here	click here	click here	click here	journal
28755320	10.1007/s11103-017-0640-6	Evaluation of the mature grain phytase candidate HvPAPhy_a gene in barley (Hordeum vulgare L.) using CRISPR/Cas9 and TALENs.	In the present study, we utilized TALEN- and CRISPR/Cas9-induced mutations to analyze the promoter of the barley phytase gene HvPAPhy_a. The purpose of the study was dual, validation of the PAPhy_a enzyme as the main contributor of the mature grain phytase activity (MGPA), as well as validating the importance of a specific promoter region of the PAPhy_a gene which contains three overlapping cis-a…	eng	Plant molecular biology	Plant Mol Biol	9106343	2017	Sep		95	1-2	111-121	Internet	Inger B Holme	Holme, IB; Wendt, T; Gil-Humanes, J; Deleuran, LC; Starker, CG; Voytas, DF; Brinch-Pedersen, H	Department of Molecular Biology and Genetics, Research Centre Flakkebjerg, Aarhus University, Slagelse, Denmark. inger.holme@mbg.au.dk.	click here	click here	click here	click here	journal
28663331	10.1104/pp.17.00411	Multiplexed Gene Editing and Protein Overexpression Using aTobacco mosaic virusViral Vector.	Development of CRISPR/Cas9 transient gene editing screening tools in plant biology has been hindered by difficulty of delivering high quantities of biologically active single guide RNAs (sgRNAs). Furthermore, it has been largely accepted that in vivo generated sgRNAs need to be devoid of extraneous nucleotides, which has limited sgRNA expression by delivery vectors. Here, we increased cellular co…	eng	Plant physiology	Plant Physiol	0401224	2017	Sep		175	1	23-35	Internet	Will B Cody	Cody, WB; Scholthof, HB; Mirkov, TE	Department of Plant Pathology and Microbiology, Texas A&M University, College Station, Texas 77840.	click here	click here	click here	click here	journal
28094975	10.1021/acssynbio.6b00295	Endoribonuclease-Based Two-Component Repressor Systems for Tight Gene Expression Control in Plants.	Tight control and multifactorial regulation of gene expression are important challenges in genetic engineering and are critical for the development of regulatory circuits. Meeting these challenges will facilitate transgene expression regulation and support the fine-tuning of metabolic pathways to avoid the accumulation of undesired intermediates. By employing the endoribonuclease Csy4 and its rec…	eng	ACS synthetic biology	ACS Synth Biol	101575075	2017	05		6	5	806-816	Internet	Yan Liang	Liang, Y; Richardson, S; Yan, J; Benites, VT; Cheng-Yue, C; Tran, T; Mortimer, J; Mukhopadhyay, A; Keasling, JD; Scheller, HV; Loqué, D	Joint BioEnergy Institute, EmeryStation East, 5885 Hollis Street, 4th Floor, Emeryville, California 94608, United States.	click here	click here	click here	click here	journal
27725916		CRISPR/Cas9 and mitochondrial gene replacement therapy: promising techniques and ethical considerations.	Thousands of mothers are at risk of transmitting mitochondrial diseases to their offspring each year, with the most severe form of these diseases being fatal [1]. With no cure, transmission prevention is the only current hope for decreasing the disease incidence. Current methods of prevention rely on low mutant maternal mitochondrial DNA levels, while those with levels close to or above threshold…	eng	American journal of stem cells	Am J Stem Cells	101578936	2016			5	2	39-52	Print	Sarah Fogleman	Fogleman, S; Santana, C; Bishop, C; Miller, A; Capco, DG	Georgetown University Medical Center, Georgetown University School of Medicine Washington, D.C., USA.	click here	click here	click here	click here	journal
26427458	10.1007/978-3-319-17121-0_73	Personalized Medicine: Cell and Gene Therapy Based on Patient-Specific iPSC-Derived Retinal Pigment Epithelium Cells.	Interest in generating human induced pluripotent stem (iPS) cells for stem cell modeling of diseases has overtaken that of patient-specific human embryonic stem cells due to the ethical, technical, and political concerns associated with the latter. In ophthalmology, researchers are currently using iPS cells to explore various applications, including: (1) modeling of retinal diseases using patient…	eng	Advances in experimental medicine and biology	Adv Exp Med Biol	0121103	2016			854		549-55	Print	Yao Li	Li, Y; Chan, L; Nguyen, HV; Tsang, SH	Department of Ophthalmology, Columbia University Medical Center, Columbia University, 160 Fort Washington Ave, Research Annex, Room 513, 10032, New York, NY, USA. yl2635@columbia.edu.	click here	click here	click here	click here	journal
27460639	10.1038/srep30422	Novel HDAd/EBV Reprogramming Vector and Highly Efficient Ad/CRISPR-Cas Sickle Cell Disease Gene Correction.	CRISPR/Cas enhanced correction of the sickle cell disease (SCD) genetic defect in patient-specific induced Pluripotent Stem Cells (iPSCs) provides a potential gene therapy for this debilitating disease. An advantage of this approach is that corrected iPSCs that are free of off-target modifications can be identified before differentiating the cells into hematopoietic progenitors for transplantatio…	eng	Scientific reports	Sci Rep	101563288	2016	Jul		6		30422	Internet	Chao Li	Li, C; Ding, L; Sun, CW; Wu, LC; Zhou, D; Pawlik, KM; Khodadadi-Jamayran, A; Westin, E; Goldman, FD; Townes, TM	Department of Biochemistry and Molecular Genetics, School of Medicine, University of Alabama at Birmingham, 1720 2nd Ave South, Birmingham, AL 35294, USA.	click here	click here	click here	click here	journal
27820943	10.1038/nature20134	CRISPR/Cas9 β-globin gene targeting in human haematopoietic stem cells.	The β-haemoglobinopathies, such as sickle cell disease and β-thalassaemia, are caused by mutations in the β-globin (HBB) gene and affect millions of people worldwide. Ex vivo gene correction in patient-derived haematopoietic stem cells followed by autologous transplantation could be used to cure β-haemoglobinopathies. Here we present a CRISPR/Cas9 gene-editing system that combines Cas9 ribonucleo…	eng	Nature	Nature	0410462	2016	11		539	7629	384-389	Internet	Daniel P Dever	Dever, DP; Bak, RO; Reinisch, A; Camarena, J; Washington, G; Nicolas, CE; Pavel-Dinu, M; Saxena, N; Wilkens, AB; Mantri, S; Uchida, N; Hendel, A; Narla, A; Majeti, R; Weinberg, KI; Porteus, MH	Department of Pediatrics, Stanford University, Stanford, California 94305, USA.	click here	click here	click here	click here	journal
27531792		[Application of CRISPR/Cas9 Gene Editing Technique to Establish S1PR5 Gene Knockout Mice].	To establish the S1PR5 gene knockout mouse model by using CRISPR/Cas9 gene editing technique so as to provide the tool for studying the regulating role of sphingosine-1-phosphate receptor 5 (S1PR5) in allogeneic hematopoietic stem cell transplantation.Single guide RNA (sgRNA) plasmids against the exon 3 of S1PR5 were designed and constructed. Then the sgRNA and hCas9 were transcribed by T7 RNA po…	chi	Zhongguo shi yan xue ye xue za zhi	Zhongguo Shi Yan Xue Ye Xue Za Zhi	101084424	2016	Aug		24	4	1155-62	Print	Zhen-Yang Gu	Gu, ZY; Zhao, XL; Yang, N; Wang, L; Wang, FY; Wang, LL; Gao, CJ	Department of Hematology, Chinese PLA Medical School & Chinese PLA General Hospital, Beijing 100853, China.	click here	click here	click here	click here	journal
27106872	10.1111/xen.12217	Silencing the porcine iGb3s gene does not affect Galα3Gal levels or measures of anticipated pig-to-human and pig-to-primate acute rejection.	The Galα(1,3)Gal epitope (α-GAL), created by α-1,3-glycosyltransferase-1 (GGTA1), is a major xenoantigen causing hyperacute rejection in pig-to-primate and pig-to-human xenotransplantation. In response, GGTA1 gene-deleted pigs have been generated. However, it is unclear whether there is a residual small amount of α-Gal epitope expressed in GGTA1(-/-) pigs. Isoglobotrihexosylceramide synthase (iGb…	eng	Xenotransplantation	Xenotransplantation	9438793	2016	03		23	2	106-16	Internet	James R Butler	Butler, JR; Skill, NJ; Priestman, DL; Platt, FM; Li, P; Estrada, JL; Martens, GR; Ladowski, JM; Tector, M; Tector, AJ	Department of Surgery, Indiana University School of Medicine, Indianapolis, IN, USA.	click here	click here	click here	click here	journal
27581487	10.1038/srep32463	The Combination of CRISPR/Cas9 and iPSC Technologies in the Gene Therapy of Human β-thalassemia in Mice.	β-thalassemia results from point mutations or small deletions in the β-globin (HBB) gene that ultimately cause anemia. The generation of induced pluripotent stem cells (iPSCs) from the somatic cells of patients in combination with subsequent homologous recombination-based gene correction provides new approaches to cure this disease. CRISPR/Cas9 is a genome editing tool that is creating a buzz in …	eng	Scientific reports	Sci Rep	101563288	2016	Sep		6		32463	Internet	Zhanhui Ou	Ou, Z; Niu, X; He, W; Chen, Y; Song, B; Xian, Y; Fan, D; Tang, D; Sun, X	Key Laboratory for Major Obstetric Diseases of Guangdong Province, Key Laboratory of Reproduction and Genetics of Guangdong Higher Education Institutes, The Third Affiliated Hospital of Guangzhou Medical University, Guangzhou, Guangdong, 510150, China.	click here	click here	click here	click here	journal
27165865	10.1016/j.jgg.2016.03.001	Targeted Gene Manipulation in Plants Using the CRISPR/Cas Technology.	The CRISPR/Cas technology is emerging as a revolutionary genome editing tool in diverse organisms including plants, and has quickly evolved into a suite of versatile tools for sequence-specific gene manipulations beyond genome editing. Here, we review the most recent applications of the CRISPR/Cas toolkit in plants and also discuss key factors for improving CRISPR/Cas performance and strategies f…	eng	Journal of genetics and genomics = Yi chuan xue bao	J Genet Genomics	101304616	2016	May		43	5	251-62	Internet	Dandan Zhang	Zhang, D; Li, Z; Li, JF	State Key Laboratory of Biocontrol and Guangdong Provincial Key Laboratory of Plant Resources, School of Life Sciences, Sun Yat-sen University, Guangzhou 510275, China.	click here	click here	click here	click here	journal
27366890	10.1002/cpmb.14	Introduction to Gene Editing and Manipulation Using CRISPR/Cas9 Technology.	Until very recently, the prospect of introducing mutations or exogenous DNA sequences at precise locations in the genomes of plants and animals was difficult, if not impossible. This rapidly changed with the demonstration that the type II CRISPR-Cas complex, a bacterial anti-viral surveillance system, could be engineered into a simple and robust platform for introducing double-stranded DNA breaks…	eng	Current protocols in molecular biology	Curr Protoc Mol Biol	8908160	2016	Jul		115		31.4.1-6	Internet	Martin Newman	Newman, M; Ausubel, FM	Department of Molecular Biology, Massachusetts General Hospital, Boston, Massachusetts.	click here	click here	click here	click here	journal
27865852	10.1016/j.jconrel.2016.11.014	Delivery methods for site-specific nucleases: Achieving the full potential of therapeutic gene editing.	The advent of site-specific nucleases, particularly CRISPR/Cas9, provides researchers with the unprecedented ability to manipulate genomic sequences. These nucleases are used to create model cell lines, engineer metabolic pathways, produce transgenic animals and plants, perform genome-wide functional screen and, most importantly, treat human diseases that are difficult to tackle by traditional me…	eng	Journal of controlled release : official journal of the Controlled Release Society	J Control Release	8607908	2016	Dec		244	Pt A	83-97	Internet	Jia Liu	Liu, J; Shui, SL	Shanghai Institute for Advanced Immunochemical Studies, ShanghaiTech University, 99 Haike Road, Shanghai 201210, China. Electronic address: liujia@shanghaitech.edu.cn.	click here	click here	click here	click here	journal
26360626	10.1111/pbi.12468	Development of germ-line-specific CRISPR-Cas9 systems to improve the production of heritable gene modifications in Arabidopsis.	The Streptococcus-derived CRISPR/Cas9 system is being widely used to perform targeted gene modifications in plants. This customized endonuclease system has two components, the single-guide RNA (sgRNA) for target DNA recognition and the CRISPR-associated protein 9 (Cas9) for DNA cleavage. Ubiquitously expressed CRISPR/Cas9 systems (UC) generate targeted gene modifications with high efficiency but …	eng	Plant biotechnology journal	Plant Biotechnol J	101201889	2016	Feb		14	2	519-32	Internet	Yanfei Mao	Mao, Y; Zhang, Z; Feng, Z; Wei, P; Zhang, H; Botella, JR; Zhu, JK	Shanghai Center for Plant Stress Biology, Chinese Academy of Sciences, Shanghai, China.	click here	click here	click here	click here	journal
28013241	10.1093/emph/eow030	Lethal gene drive selects inbreeding.	The use of 'selfish' gene drive systems to suppress or even extinguish populations has been proposed on theoretical grounds for almost half a century. Creating these genes has recently become possible with CRISPR technology. One seemingly feasible approach, originally proposed by Burt, is to create a homing endonuclease gene (HEG) that inserts into an essential gene, enabling heterozygote viabili…	eng	Evolution, medicine, and public health	Evol Med Public Health	101616698	2016	12		2017	1	1-16	Print	James J Bull	Bull, JJ	Department of Integrative Biology, University of Texas, Austin, TX, USA bull@utexas.edu.	click here	click here	click here	click here	journal
27910002	10.1186/s12284-016-0134-1	The Rice Pentatricopeptide Repeat Gene TCD10 is Needed for Chloroplast Development under Cold Stress.	Chloroplast plays a vital role in plant development and growth. The pentatricopeptide repeat (PPR) gene family is one of the largest gene families in plants. In addition, cold stress affects a broad spectrum of cellular components, e.g. chloroplast, and metabolism in plants. However, the regulatory mechanism for rice PPR genes on chloroplast development still remains elusive under cold stress.In …	eng	Rice (New York, N.Y.)	Rice (N Y)	101503136	2016	Dec		9	1	67	Print	Lanlan Wu	Wu, L; Wu, J; Liu, Y; Gong, X; Xu, J; Lin, D; Dong, Y	Development Center of Plant Germplasm Resources, College of Life and Environment Sciences, Shanghai Normal University, Shanghai, 200234, China.	click here	click here	click here	click here	journal
26122099		Pluripotent Stem Cells for Gene Therapy of Degenerative Muscle Diseases.	Human pluripotent stem cells represent a unique source for cell-based therapies and regenerative medicine. The intrinsic features of these cells such as their easy accessibility and their capacity to be expanded indefinitely overcome some limitations of conventional adult stem cells. Furthermore, the possibility to derive patient-specific induced pluripotent stem (iPS) cells in combination with t…	eng	Current gene therapy	Curr Gene Ther	101125446	2015			15	4	364-80	Internet	Mariana Loperfido	Loperfido, M; Steele-Stallard, HB; Tedesco, FS; VandenDriessche, T	Department of Cardiovascular Sciences, University of Leuven, Leuven, 3000, Belgium and Department of Cell and Developmental Biology, University College London, London, WC1E 6DE, United Kingdom. Thierry.Vandendriessche@vub.ac.be.	click here	click here	click here	click here	journal
25475058	10.1038/cr.2014.160	Correction of a genetic disease by CRISPR-Cas9-mediated gene editing in mouse spermatogonial stem cells.	Spermatogonial stem cells (SSCs) can produce numerous male gametes after transplantation into recipient testes, presenting a valuable approach for gene therapy and continuous production of gene-modified animals. However, successful genetic manipulation of SSCs has been limited, partially due to complexity and low efficiency of currently available genetic editing techniques. Here, we show that eff…	eng	Cell research	Cell Res	9425763	2015	Jan		25	1	67-79	Internet	Yuxuan Wu	Wu, Y; Zhou, H; Fan, X; Zhang, Y; Zhang, M; Wang, Y; Xie, Z; Bai, M; Yin, Q; Liang, D; Tang, W; Liao, J; Zhou, C; Liu, W; Zhu, P; Guo, H; Pan, H; Wu, C; Shi, H; Wu, L; Tang, F; Li, J	1] Group of Epigenetic Reprogramming, State Key Laboratory of Cell Biology, Institute of Biochemistry and Cell Biology, Shanghai Institutes for Biological Sciences, Chinese Academy of Sciences, Shanghai 200031, China [2] Shanghai Key Laboratory of Molecular Andrology, Institute of Biochemistry and Cell Biology, Shanghai Institutes for Biological Sciences, Chinese Academy of Sciences, Shanghai 200…	click here	click here	click here	click here	journal
26319641	10.1016/j.mehy.2015.08.012	Transgenic DNA modules with pre-programmed self-destruction: Universal molecular devices to escape 'genetic litter' in gene and cell therapy.	Gene delivery to human somatic cells is a well-established therapeutic strategy to treat a variety of diseases. In addition, gene transfer to human cells is required to generate human induced pluripotent cells and also to eliminate tumorigenic undifferentiated cells in many types of stem-cell derived transplantation material. The expression of transgenes in these medical technologies is often req…	eng	Medical hypotheses	Med Hypotheses	7505668	2015	Nov		85	5	686-9	Internet	Oleg E Tolmachov	Tolmachov, OE	Section of Molecular Medicine, National Heart and Lung Institute, Imperial College London, London, United Kingdom. Electronic address: epsilon@tinyworld.co.uk.	click here	click here	click here	click here	journal
25894090	10.1007/s13238-015-0153-5	CRISPR/Cas9-mediated gene editing in human tripronuclear zygotes.	Genome editing tools such as the clustered regularly interspaced short palindromic repeat (CRISPR)-associated system (Cas) have been widely used to modify genes in model systems including animal zygotes and human cells, and hold tremendous promise for both basic research and clinical applications. To date, a serious knowledge gap remains in our understanding of DNA repair mechanisms in human earl…	eng	Protein & cell	Protein Cell	101532368	2015	May		6	5	363-372	Internet	Puping Liang	Liang, P; Xu, Y; Zhang, X; Ding, C; Huang, R; Zhang, Z; Lv, J; Xie, X; Chen, Y; Li, Y; Sun, Y; Bai, Y; Songyang, Z; Ma, W; Zhou, C; Huang, J	Guangdong Province Key Laboratory of Reproductive Medicine, the First Affiliated Hospital, and Key Laboratory of Gene Engineering of the Ministry of Education, School of Life Sciences, Sun Yat-sen University, Guangzhou, 510275 China.	click here	click here	click here	click here	journal
25856577	10.1371/journal.pone.0122755	Gene editing by co-transformation of TALEN and chimeric RNA/DNA oligonucleotides on the rice OsEPSPS gene and the inheritance of mutations.	Although several site-speciﬁc nucleases (SSNs), such as zinc-ﬁnger nucleases (ZFNs), transcription activator-like effector nucleases (TALENs), and the clustered regularly interspaced short palindromic repeat (CRISPR)/Cas, have emerged as powerful tools for targeted gene editing in many organisms, to date, gene targeting (GT) in plants remains a formidable challenge. In the present study, we attem…	eng	PloS one	PLoS One	101285081	2015			10	4	e0122755	Internet	Mugui Wang	Wang, M; Liu, Y; Zhang, C; Liu, J; Liu, X; Wang, L; Wang, W; Chen, H; Wei, C; Ye, X; Li, X; Tu, J	Institute of Crop Sciences, College of Agriculture and Biotechnology, Zhejiang University, Hangzhou, Zhejiang Province, China.	click here	click here	click here	click here	journal
26354079	10.1038/ncomms9212	Outbred genome sequencing and CRISPR/Cas9 gene editing in butterflies.	Butterflies are exceptionally diverse but their potential as an experimental system has been limited by the difficulty of deciphering heterozygous genomes and a lack of genetic manipulation technology. Here we use a hybrid assembly approach to construct high-quality reference genomes for Papilio xuthus (contig and scaffold N50: 492 kb, 3.4 Mb) and Papilio machaon (contig and scaffold N50: 81 kb, …	eng	Nature communications	Nat Commun	101528555	2015	Sep		6		8212	Internet	Xueyan Li	Li, X; Fan, D; Zhang, W; Liu, G; Zhang, L; Zhao, L; Fang, X; Chen, L; Dong, Y; Chen, Y; Ding, Y; Zhao, R; Feng, M; Zhu, Y; Feng, Y; Jiang, X; Zhu, D; Xiang, H; Feng, X; Li, S; Wang, J; Zhang, G; Kronforst, MR; Wang, W	State Key Laboratory of Genetic Resources and Evolution, Kunming Institute of Zoology, Chinese Academy of Sciences, Kunming 650223, China.	click here	click here	click here	click here	journal
25459138	10.1016/j.mehy.2014.09.022	Enhancing stem cell survival in an ischemic heart by CRISPR-dCas9-based gene regulation.	Ischemic heart disease has remained the number one killer around the world for over the past 20 years. While stem cell therapy has become a promising new frontier to repair the damaged heart, limited stem cell survivability post-transplantation has precluded widespread use of this therapy. Strategies to genetically modify stem cells to activate pro-survival and anti-apoptotic and anti-inflammator…	eng	Medical hypotheses	Med Hypotheses	7505668	2014	Dec		83	6	702-5	Internet	Alexander Pan	Pan, A; Weintraub, NL; Tang, Y	Vascular Biology Center, Department of Medicine, Medical College of Georgia/Georgia Regents University, 1459 Laney Walker Blvd, Augusta, GA 30912, USA.	click here	click here	click here	click here	journal
25096406	10.1101/gr.173427.114	Seamless gene correction of β-thalassemia mutations in patient-specific iPSCs using CRISPR/Cas9 and piggyBac.	β-thalassemia, one of the most common genetic diseases worldwide, is caused by mutations in the human hemoglobin beta (HBB) gene. Creation of human induced pluripotent stem cells (iPSCs) from β-thalassemia patients could offer an approach to cure this disease. Correction of the disease-causing mutations in iPSCs could restore normal function and provide a rich source of cells for transplantation.…	eng	Genome research	Genome Res	9518021	2014	Sep		24	9	1526-33	Internet	Fei Xie	Xie, F; Ye, L; Chang, JC; Beyer, AI; Wang, J; Muench, MO; Kan, YW	Department of Medicine, University of California, San Francisco, California 94143, USA;	click here	click here	click here	click here	journal
25017160	10.1016/j.plantsci.2014.05.015	Artificial transcription factor-mediated regulation of gene expression.	The transcriptional regulation of endogenous genes with artificial transcription factors (TFs) can offer new tools for plant biotechnology. Three systems are available for mediating site-specific DNA recognition of artificial TFs: those based on zinc fingers, TALEs, and on the CRISPR/Cas9 technology. Artificial TFs require an effector domain that controls the frequency of transcription initiation…	eng	Plant science : an international journal of experimental plant biology	Plant Sci	9882015	2014	Aug		225		58-67	Internet	Niels van Tol	van Tol, N; van der Zaal, BJ	Department of Molecular and Developmental Genetics, Institute of Biology Leiden, Leiden University, Sylvius Laboratory, Sylviusweg 72, 2333 BE Leiden, The Netherlands.	click here	click here	click here	click here	journal
25327456	10.1111/tpj.12704	The CRISPR/Cas system can be used as nuclease for in planta gene targeting and as paired nickases for directed mutagenesis in Arabidopsis resulting in heritable progeny.	The CRISPR/Cas nuclease is becoming a major tool for targeted mutagenesis in eukaryotes by inducing double-strand breaks (DSBs) at pre-selected genomic sites that are repaired by non-homologous end joining (NHEJ) in an error-prone way. In plants, it could be demonstrated that the Cas9 nuclease is able to induce heritable mutations in Arabidopsis thaliana and rice. Gene targeting (GT) by homologou…	eng	The Plant journal : for cell and molecular biology	Plant J	9207397	2014	Dec		80	6	1139-50	Internet	Simon Schiml	Schiml, S; Fauser, F; Puchta, H	Botanical Institute II, Karlsruhe Institute of Technology, POB 6980, 76049, Karlsruhe, Germany.	click here	click here	click here	click here	journal
24550464	10.1073/pnas.1400822111	Multigeneration analysis reveals the inheritance, specificity, and patterns of CRISPR/Cas-induced gene modifications in Arabidopsis.	The CRISPR (clustered regularly interspaced short palindromic repeat)/Cas (CRISPR-associated) system has emerged as a powerful tool for targeted gene editing in many organisms, including plants. However, all of the reported studies in plants focused on either transient systems or the first generation after the CRISPR/Cas system was stably transformed into plants. In this study we examined several…	eng	Proceedings of the National Academy of Sciences of the United States of America	Proc Natl Acad Sci U S A	7505876	2014	Mar		111	12	4632-7	Internet	Zhengyan Feng	Feng, Z; Mao, Y; Xu, N; Zhang, B; Wei, P; Yang, DL; Wang, Z; Zhang, Z; Zheng, R; Yang, L; Zeng, L; Liu, X; Zhu, JK	Shanghai Center for Plant Stress Biology, Chinese Academy of Sciences, Shanghai 200032, People's Republic of China.	click here	click here	click here	click here	journal
24918588	10.1371/journal.pone.0099225	Efficient CRISPR/Cas9-mediated gene editing in Arabidopsis thaliana and inheritance of modified genes in the T2 and T3 generations.	The newly developed CRISPR/Cas9 system for targeted gene knockout or editing has recently been shown to function in plants in both transient expression systems as well as in primary T1 transgenic plants. However, stable transmission of genes modified by the Cas9/single guide RNA (sgRNA) system to the T2 generation and beyond has not been demonstrated. Here we provide extensive data demonstrating …	eng	PloS one	PLoS One	101285081	2014			9	6	e99225	Internet	WenZhi Jiang	Jiang, W; Yang, B; Weeks, DP	Department of Biochemistry, University of Nebraska, Lincoln, Nebraska, United States of America.	click here	click here	click here	click here	journal
24877793	10.1021/ar500039w	Synthetic zinc finger proteins: the advent of targeted gene regulation and genome modification technologies.	The understanding of gene regulation and the structure and function of the human genome increased dramatically at the end of the 20th century. Yet the technologies for manipulating the genome have been slower to develop. For instance, the field of gene therapy has been focused on correcting genetic diseases and augmenting tissue repair for more than 40 years. However, with the exception of a few …	eng	Accounts of chemical research	Acc Chem Res	0157313	2014	Aug		47	8	2309-18	Internet	Charles A Gersbach	Gersbach, CA; Gaj, T; Barbas, CF	Department of Biomedical Engineering, Duke University , Durham, North Carolina 27708, United States.	click here	click here	click here	click here	journal
24284874	10.3390/v5112748	Newer gene editing technologies toward HIV gene therapy.	Despite the great success of highly active antiretroviral therapy (HAART) in ameliorating the course of HIV infection, alternative therapeutic approaches are being pursued because of practical problems associated with life-long therapy. The eradication of HIV in the so-called "Berlin patient" who received a bone marrow transplant from a CCR5-negative donor has rekindled interest in genome enginee…	eng	Viruses	Viruses	101509722	2013	Nov		5	11	2748-66	Internet	N Manjunath	Manjunath, N; Yi, G; Dang, Y; Shankar, P	Center of Excellence in Infectious Disease, Department of Biomedical Sciences, Paul L. Foster School of Medicine, Texas Tech University Health Sciences Center, El Paso, TX 79905, USA. Manjunath.swamy@ttuhsc.edu.	click here	click here	click here	click here	journal
23536990	10.1089/zeb.2013.9999	The CRISPR system--keeping zebrafish gene targeting fresh.	We are entering a new era in our ability to modify and edit the genomes of model organisms. Zinc finger nucleases (ZFNs) opened the door to the first custom nuclease-targeted genome engineering in the late 1990s. However, ZFNs remained out of reach for most research labs because of the difficulty of production, high costs, and modest efficacy in many applications. Transcription activator-like eff…	eng	Zebrafish	Zebrafish	101225070	2013	Mar		10	1	116-8	Internet	Patrick R Blackburn	Blackburn, PR; Campbell, JM; Clark, KJ; Ekker, SC	Department of Biochemistry and Molecular Biology, Mayo Addiction Research Center, Mayo Clinic, 200 First Street SW, Rochester, MN 55905, USA.	click here	click here	click here	click here	journal
24919525	10.1111/xen.12089	The combinational use of CRISPR/Cas9-based gene editing and targeted toxin technology enables efficient biallelic knockout of the α-1,3-galactosyltransferase gene in porcine embryonic fibroblasts.	The recent development of the type II clustered regularly interspaced short palindromic repeats (CRISPR)/Cas9 system has enabled genome editing of mammalian genomes including those of mice and human; however, its applicability and efficiency in the pig have not been studied in depth. Here, using the CRISPR/Cas9 system, we aimed to destroy the function of the porcine α-1,3-galactosyltransferase (α…	eng	Xenotransplantation	Xenotransplantation	9438793			2014 May-Jun	21	3	291-300	Internet	Masahiro Sato	Sato, M; Miyoshi, K; Nagao, Y; Nishi, Y; Ohtsuka, M; Nakamura, S; Sakurai, T; Watanabe, S	Section of Gene Expression Regulation, Frontier Science Research Center, Kagoshima University, Kagoshima, Japan.	click here	click here	click here	click here	journal
27340698	10.1128/mSphere.00130-16	Candida albicans Gene Deletion with a Transient CRISPR-Cas9 System.	Clustered regularly interspaced short palindromic repeat (CRISPR) and CRISPR-associated gene 9 (CRISPR-Cas9) systems are used for a wide array of genome-editing applications in organisms ranging from fungi to plants and animals. Recently, a CRISPR-Cas9 system has been developed for the diploid fungal pathogen Candida albicans; the system accelerates genetic manipulation dramatically [V. K. Vyas, …	eng	mSphere	mSphere	101674533			2016 May-Jun	1	3		Print	Kyunghun Min	Min, K; Ichikawa, Y; Woolford, CA; Mitchell, AP	Department of Biological Sciences, Carnegie Mellon University, Pittsburgh, Pennsylvania, USA.	click here	click here	click here	click here	journal
28876032	10.13345/j.cjb.160388	[Efficient identification of gene knockout mutant mediated by CRISPR/Cas9 by CELⅠ crude extracts].	CRISPR/Cas9, emerged as an efficient and powerful gene editing technology, has become the mainstream genome editing technology. Constructing mutants using CRISPR/Cas9 system is of great significance to the functional study and breeding application of useful genes. As the basis of the technology, a method for identification of mutation with efficiency and lower cost is needed. In this report, we s…	chi	Sheng wu gong cheng xue bao = Chinese journal of biotechnology	Sheng Wu Gong Cheng Xue Bao	9426463	2017	May		33	5	775-784	Print	Wanbing Luo	Luo, W; Lin, Q; Li, X; Zhou, Z; Yang, H; Du, R; Li, H	Guangdong Key Laboratory of Biotechnology for Plant Development, School of Life Sciences, South China Normal University, Guangzhou 510631, Guangdong, China.	click here	click here	click here	click here	journal
28331197	10.1038/s41598-017-00374-7	Efficient Generation of diRNAs Requires Components in the Posttranscriptional Gene Silencing Pathway.	It has been reported that double-stranded break (DSB)-induced small RNAs (diRNAs) are generated via the RNA-directed DNA methylation pathway and function in DSB repair in Arabidposis. However, important questions remain regarding the biogenesis and function of diRNAs. Here, we used CRISPR/Cas9- or TALEN-triggered DSBs to characterize diRNAs in Arabidopsis and rice. We found that 21-nt diRNAs were…	eng	Scientific reports	Sci Rep	101563288	2017	03		7	1	301	Internet	Daisuke Miki	Miki, D; Zhu, P; Zhang, W; Mao, Y; Feng, Z; Huang, H; Zhang, H; Li, Y; Liu, R; Zhang, H; Qi, Y; Zhu, JK	Shanghai Center for Plant Stress Biology, Shanghai Institutes for Biological Sciences, Chinese Academy of Sciences, Shanghai, 210602, China. miki@sibs.ac.cn.	click here	click here	click here	click here	journal
27515683	10.1186/s12896-016-0289-2	High-efficiency CRISPR/Cas9 multiplex gene editing using the glycine tRNA-processing system-based strategy in maize.	CRISPR/Cas9 genome editing strategy has been applied to a variety of species and the tRNA-processing system has been used to compact multiple gRNAs into one synthetic gene for manipulating multiple genes in rice.We optimized and introduced the multiplex gene editing strategy based on the tRNA-processing system into maize. Maize glycine-tRNA was selected to design multiple tRNA-gRNA units for the …	eng	BMC biotechnology	BMC Biotechnol	101088663	2016	08		16	1	58	Internet	Weiwei Qi	Qi, W; Zhu, T; Tian, Z; Li, C; Zhang, W; Song, R	Shanghai Key Laboratory of Bio-Energy Crops, School of Life Sciences, Shanghai University, 333 Nanchen Road, Shanghai, 200444, China.	click here	click here	click here	click here	journal
26507366	10.1111/mpp.12318	Efficient disruption and replacement of an effector gene in the oomycete Phytophthora sojae using CRISPR/Cas9.	Phytophthora sojae is an oomycete pathogen of soybean. As a result of its economic importance, P. sojae has become a model for the study of oomycete genetics, physiology and pathology. The lack of efficient techniques for targeted mutagenesis and gene replacement have long hampered genetic studies of pathogenicity in Phytophthora species. Here, we describe a CRISPR/Cas9 system enabling rapid and …	eng	Molecular plant pathology	Mol Plant Pathol	100954969	2016	Jan		17	1	127-39	Internet	Yufeng Fang	Fang, Y; Tyler, BM	Interdisciplinary PhD Program in Genetics, Bioinformatics & Computational Biology, Virginia Tech, Blacksburg, VA, 24061, USA.	click here	click here	click here	click here	journal
26582727	10.1104/pp.15.01661	Rj4, a Gene Controlling Nodulation Specificity in Soybeans, Encodes a Thaumatin-Like Protein But Not the One Previously Reported.	Rj4 is a dominant gene in soybeans (Glycine max) that restricts nodulation by many strains of Bradyrhizobium elkanii. The soybean-B. elkanii symbiosis has a low nitrogen-fixation efficiency, but B. elkanii strains are highly competitive for nodulation; thus, cultivars harboring an Rj4 allele are considered favorable. Cloning the Rj4 gene is the first step in understanding the molecular basis of R…	eng	Plant physiology	Plant Physiol	0401224	2016	Jan		170	1	26-32	Internet	Fang Tang	Tang, F; Yang, S; Liu, J; Zhu, H	Department of Plant and Soil Sciences, University of Kentucky, Lexington, Kentucky 40546-0312.	click here	click here	click here	click here	journal
25824104	10.1111/tpj.12838	Gene targeting by the TAL effector PthXo2 reveals cryptic resistance gene for bacterial blight of rice.	Bacterial blight of rice is caused by the γ-proteobacterium Xanthomonas oryzae pv. oryzae, which utilizes a group of type III TAL (transcription activator-like) effectors to induce host gene expression and condition host susceptibility. Five SWEET genes are functionally redundant to support bacterial disease, but only two were experimentally proven targets of natural TAL effectors. Here, we repor…	eng	The Plant journal : for cell and molecular biology	Plant J	9207397	2015	May		82	4	632-43	Internet	Junhui Zhou	Zhou, J; Peng, Z; Long, J; Sosso, D; Liu, B; Eom, JS; Huang, S; Liu, S; Vera Cruz, C; Frommer, WB; White, FF; Yang, B	Department of Genetics, Development and Cell Biology, Iowa State University, Ames, IA, 50011, USA.	click here	click here	click here	click here	journal
26039904	10.1002/bit.25662	Tailor-made CRISPR/Cas system for highly efficient targeted gene replacement in the rice blast fungus.	CRISPR/Cas-derived RNA-guided nucleases (RGNs) that can generate DNA double-strand breaks (DSBs) at a specific sequence are widely used for targeted genome editing by induction of DSB repair in many organisms. The CRISPR/Cas system consists of two components: a single Cas9 nuclease and a single-guide RNA (sgRNA). Therefore, the system for constructing RGNs is simple and efficient, but the utiliza…	eng	Biotechnology and bioengineering	Biotechnol Bioeng	7502021	2015	Dec		112	12	2543-9	Internet	Takayuki Arazoe	Arazoe, T; Miyoshi, K; Yamato, T; Ogawa, T; Ohsato, S; Arie, T; Kuwata, S	Graduate School of Agriculture, Meiji University, Kawasaki, Kanagawa 214-8571, Japan.	click here	click here	click here	click here	journal
29241845	10.1016/j.ibmb.2017.12.003	CRISPR/Cas9-mediated knockout of two eye pigmentation genes in the brown planthopper, Nilaparvata lugens (Hemiptera: Delphacidae).	The brown planthopper Nilaparvata lugens is one of the most destructive insect pests in Asia, demonstrating high fertility and causing huge crop losses by sucking sap of rice as well as transmitting viruses. However, functional genomic studies on N. lugens are seriously constrained by lack of genetic tools. Here, we employed two eye pigmentation genes to generate germ-line mutations in N. lugens …	eng	Insect biochemistry and molecular biology	Insect Biochem Mol Biol	9207282	2018	Feb		93		19-26	Internet	Wen-Hua Xue	Xue, WH; Xu, N; Yuan, XB; Chen, HH; Zhang, JL; Fu, SJ; Zhang, CX; Xu, HJ	State Key Laboratory of Rice Biology and Ministry of Agriculture Key Laboratory of Agricultural Entomology, Institute of Insect Sciences, Zhejiang University, Hangzhou 310058, China.	click here	click here	click here	click here	journal
29218376	10.1007/s00122-017-3036-8	Genetic dissection and validation of candidate genes for flag leaf size in rice (Oryza sativa L.).	Two major loci with functional candidate genes were identified and validated affecting flag leaf size, which offer desirable genes to improve leaf architecture and photosynthetic capacity in rice. Leaf size is a major determinant of plant architecture and yield potential in crops. However, the genetic and molecular mechanisms regulating leaf size remain largely elusive. In this study, quantitativ…	eng	TAG. Theoretical and applied genetics. Theoretische und angewandte Genetik	Theor Appl Genet	0145600	2018	Apr		131	4	801-815	Internet	Xinxin Tang	Tang, X; Gong, R; Sun, W; Zhang, C; Yu, S	National Key Laboratory of Crop Genetic Improvement, Wuhan, 430070, China.	click here	click here	click here	click here	journal
29216494	10.1016/j.plaphy.2017.11.021	Mutagenesis of the FAE1 genes significantly changes fatty acid composition in seeds of Camelina sativa.	Camelina sativa is a re-emerging low-input oilseed crop that has great potentials. It is necessary to ameliorate camelina oils for optimized fatty acid composition that can meet different application requirements. Camelina seed contains significant amounts of C20-C24 very long-chain fatty acids (VLCFAs) that may not be desirable. We demonstrated that these VLCFAs can be effectively reduced by dea…	eng	Plant physiology and biochemistry : PPB	Plant Physiol Biochem	9882449	2018	Feb		123		1-7	Internet	Mehmet E Ozseyhan	Ozseyhan, ME; Kang, J; Mu, X; Lu, C	Department of Plant Sciences and Plant Pathology, Montana State University, Bozeman, MT 59717, USA.	click here	click here	click here	click here	journal
27442592	10.1111/pbi.12603	ARGOS8 variants generated by CRISPR-Cas9 improve maize grain yield under field drought stress conditions.	Maize ARGOS8 is a negative regulator of ethylene responses. A previous study has shown that transgenic plants constitutively overexpressing ARGOS8 have reduced ethylene sensitivity and improved grain yield under drought stress conditions. To explore the targeted use of ARGOS8 native expression variation in drought-tolerant breeding, a diverse set of over 400 maize inbreds was examined for ARGOS8 …	eng	Plant biotechnology journal	Plant Biotechnol J	101201889	2017	Feb		15	2	207-216	Internet	Jinrui Shi	Shi, J; Gao, H; Wang, H; Lafitte, HR; Archibald, RL; Yang, M; Hakimi, SM; Mo, H; Habben, JE	DuPont Pioneer, Johnston, IA, USA.	click here	click here	click here	click here	journal
28295376	10.1111/nph.14510	Both maternally and paternally imprinted genes regulate seed development in rice.	Genetic imprinting refers to the unequal expression of paternal and maternal alleles of a gene in sexually reproducing organisms, including mammals and flowering plants. Although many imprinted genes have been identified in plants, the functions of these imprinted genes have remained largely uninvestigated. We report genome-wide analysis of gene expression, DNA methylation and small RNAs in the r…	eng	The New phytologist	New Phytol	9882884	2017	Oct		216	2	373-387	Internet	Jingya Yuan	Yuan, J; Chen, S; Jiao, W; Wang, L; Wang, L; Ye, W; Lu, J; Hong, D; You, S; Cheng, Z; Yang, DL; Chen, ZJ	State Key Laboratory of Crop Genetics and Germplasm Enhancement, Nanjing Agricultural University, 1 Weigang Road, Nanjing, 210095, China.	click here	click here	click here	click here	journal
29087011	10.1111/pbi.12857	CRISPR/Cas9 and TALENs generate heritable mutations for genes involved in small RNA processing of Glycine max and Medicago truncatula.	Processing of double-stranded RNA precursors into small RNAs is an essential regulator of gene expression in plant development and stress response. Small RNA processing requires the combined activity of a functionally diverse group of molecular components. However, in most of the plant species, there are insufficient mutant resources to functionally characterize each encoding gene. Here, mutation…	eng	Plant biotechnology journal	Plant Biotechnol J	101201889	2017	Oct					Internet	Shaun J Curtin	Curtin, SJ; Xiong, Y; Michno, JM; Campbell, BW; Stec, AO; Čermák, T; Starker, C; Voytas, DF; Eamens, AL; Stupar, RM	Department of Plant Pathology, University of Minnesota, St. Paul, MN, USA.	click here	click here	click here	click here	journal
28066464	10.3389/fpls.2016.01904	DNA-Free Genetically Edited Grapevine and Apple Protoplast Using CRISPR/Cas9 Ribonucleoproteins.	The combined availability of whole genome sequences and genome editing tools is set to revolutionize the field of fruit biotechnology by enabling the introduction of targeted genetic changes with unprecedented control and accuracy, both to explore emergent phenotypes and to introduce new functionalities. Although plasmid-mediated delivery of genome editing components to plant cells is very effici…	eng	Frontiers in plant science	Front Plant Sci	101568200	2016			7		1904	Print	Mickael Malnoy	Malnoy, M; Viola, R; Jung, MH; Koo, OJ; Kim, S; Kim, JS; Velasco, R; Nagamangala Kanchiswamy, C	Research and Innovation Centre, Genomics and Biology of Fruit Crop Department, Fondazione Edmund Mach Trento, Italy.	click here	click here	click here	click here	journal
26089199	10.1038/srep11491	Generation of inheritable and "transgene clean" targeted genome-modified rice in later generations using the CRISPR/Cas9 system.	The CRISPR/Cas9 system is becoming an important genome editing tool for crop breeding. Although it has been demonstrated that target mutations can be transmitted to the next generation, their inheritance pattern has not yet been fully elucidated. Here, we describe the CRISPR/Cas9-mediated genome editing of four different rice genes with the help of online target-design tools. High-frequency mutag…	eng	Scientific reports	Sci Rep	101563288	2015	Jun		5		11491	Internet	Rong-Fang Xu	Xu, RF; Li, H; Qin, RY; Li, J; Qiu, CH; Yang, YC; Ma, H; Li, L; Wei, PC; Yang, JB	Key Laboratory of Rice Genetic Breeding of Anhui Province, Rice Research Institute, Anhui Academy of Agricultural Sciences, Hefei, 230031, China.	click here	click here	click here	click here	journal
25200087	10.1093/nar/gku806	Large chromosomal deletions and heritable small genetic changes induced by CRISPR/Cas9 in rice.	The Cas9/sgRNA of the CRISPR/Cas system has emerged as a robust technology for targeted gene editing in various organisms, including plants, where Cas9/sgRNA-mediated small deletions/insertions at single cleavage sites have been reported in transient and stable transformations, although genetic transmission of edits has been reported only in Arabidopsis and rice. Large chromosomal excision betwee…	eng	Nucleic acids research	Nucleic Acids Res	0411011	2014			42	17	10903-14	Internet	Huanbin Zhou	Zhou, H; Liu, B; Weeks, DP; Spalding, MH; Yang, B	Department of Genetics, Development and Cell Biology, Iowa State University, Ames, IA 50011, USA.	click here	click here	click here	click here	journal
29407192	10.1016/j.meegid.2018.01.027	The truncated Rv2820c of Mycobacterium tuberculosis Beijing family augments intracellular survival of M. smegmatis by altering cytokine profile and inhibiting NO generation.	Genetic variations among genes of Mycobacterium tuberculosis may be associated with antigenic variation and immune evasion, which complicates the pathogenesis of M. tuberculosis. The hyper-virulent M. tuberculosis Beijing strains harbored several large sequence deletions, among which RD207 attributed to the deletion of CRISPR loci and several Cas genes. RD207 also gave rise to a truncated gene Rv…	eng	Infection, genetics and evolution : journal of molecular epidemiology and evolutionary genetics in infectious diseases	Infect Genet Evol	101084138	2018	Apr		59		75-83	Internet	Xiaoqian Zhai	Zhai, X; Luo, T; Peng, X; Ma, P; Wang, C; Zhang, C; Suo, J; Bao, L	Laboratory of Infection and Immunity, West China School of Basic Medical Sciences & Forensic Medicine, Sichuan University, Chengdu, China.	click here	click here	click here	click here	journal
28364122	10.1038/s41598-017-00654-2	A Convenient Cas9-based Conditional Knockout Strategy for Simultaneously Targeting Multiple Genes in Mouse.	The most powerful way to probe protein function is to characterize the consequence of its deletion. Compared to conventional gene knockout (KO), conditional knockout (cKO) provides an advanced gene targeting strategy with which gene deletion can be performed in a spatially and temporally restricted manner. However, for most species that are amphiploid, the widely used Cre-flox conditional KO (cKO…	eng	Scientific reports	Sci Rep	101563288	2017	03		7	1	517	Internet	Jiang Chen	Chen, J; Du, Y; He, X; Huang, X; Shi, YS	State Key Laboratory of Pharmaceutical Biotechnology and MOE Key Laboratory of Model Animal for Disease Study, Model Animal Research Center of Nanjing University, Nanjing, 210061, China.	click here	click here	click here	click here	journal
28143571	10.1186/s13059-016-1144-4	Single Cas9 nickase induced generation of NRAMP1 knockin cattle with reduced off-target effects.	The CRISPR-Cas9 system is a widely utilized platform for transgenic animal production in various species, although its off-target effects should be addressed. Several applications of this tool have been proposed in model animals but remain insufficient for transgenic livestock production.Here, we report the first application of single Cas9 nickase (Cas9n) to induce gene insertion at a selected lo…	eng	Genome biology	Genome Biol	100960660	2017	Feb		18	1	13	Internet	Yuanpeng Gao	Gao, Y; Wu, H; Wang, Y; Liu, X; Chen, L; Li, Q; Cui, C; Liu, X; Zhang, J; Zhang, Y	College of Veterinary Medicine, Northwest A&F University, Yangling, 712100, Shaanxi, China.	click here	click here	click here	click here	journal
24510124	10.1007/s00425-014-2029-y	Precision genetic modifications: a new era in molecular biology and crop improvement.	Recently, the use of programmable DNA-binding proteins such as ZFP/ZFNs, TALE/TALENs and CRISPR/Cas has produced unprecedented advances in gene targeting and genome editing in prokaryotes and eukaryotes. These advances allow researchers to specifically alter genes, reprogram epigenetic marks, generate site-specific deletions and potentially cure diseases. Unlike previous methods, these precision …	eng	Planta	Planta	1250576	2014	Apr		239	4	921-39	Internet	Franziska Fichtner	Fichtner, F; Urrea Castellanos, R; Ülker, B	Plant Molecular Engineering Group, Institute of Cellular and Molecular Botany, University of Bonn, Kirschallee 1, 53115, Bonn, Germany.	click here	click here	click here	click here	journal
25472628	10.1186/1471-2156-15-S2-S5	Subtractive and differential hybridization molecular analyses of Ceratitis capitata XX/XY versus XX embryos to search for male-specific early transcribed genes.	The agricultural pest Ceratitis capitata, also known as the Mediterranean fruit fly or Medfly, is a fruit crop pest of very high economic relevance in different continents. The strategy to separate Ceratitis males from females (sexing) in mass rearing facilities is a useful step before the sterilization and release of male-only flies in Sterile Insect Technique control programs (SIT). The identif…	eng	BMC genetics	BMC Genet	100966978	2014			15 Suppl 2		S5	Internet	Marco Salvemini	Salvemini, M; D'Amato, R; Petrella, V; Ippolito, D; Ventre, G; Zhang, Y; Saccone, G		click here	click here	click here	click here	journal
29482624	10.1186/s13287-018-0779-3	One-step genetic correction of hemoglobin E/beta-thalassemia patient-derived iPSCs by the CRISPR/Cas9 system.	Thalassemia is the most common genetic disease worldwide; those with severe disease require lifelong blood transfusion and iron chelation therapy. The definitive cure for thalassemia is allogeneic hematopoietic stem cell transplantation, which is limited due to lack of HLA-matched donors and the risk of post-transplant complications. Induced pluripotent stem cell (iPSC) technology offers prospect…	eng	Stem cell research & therapy	Stem Cell Res Ther	101527581	2018	Feb		9	1	46	Internet	Methichit Wattanapanitch	Wattanapanitch, M; Damkham, N; Potirat, P; Trakarnsanga, K; Janan, M; U-Pratya, Y; Kheolamai, P; Klincumhom, N; Issaragrisil, S	Siriraj Center of Excellence for Stem Cell Research, Faculty of Medicine Siriraj Hospital, Mahidol University, Bangkok, Thailand.	click here	click here	click here	click here	journal
29392632	10.1007/s11248-017-0052-z	Arabidopsis glutamate:glyoxylate aminotransferase 1 (Ler) mutants generated by CRISPR/Cas9 and their characteristics.	Clustered regularly interspaced short palindromic repeats (CRISPR)/CRISPR-associated 9 (CRISPR/Cas9) technology provides an efficient tool for editing the genomes of plants, animals and microorganisms. Glutamate:glyoxylate aminotransferase 1 (GGAT1) is a key enzyme in the photorespiration pathway; however, its regulation mechanism is largely unknown. Given that EMS-mutagenized ggat1 (Col-0 backgr…	eng	Transgenic research	Transgenic Res	9209120	2018	Feb		27	1	61-74	Internet	Yaping Liang	Liang, Y; Zeng, X; Peng, X; Hou, X	Research Center of Plant Stress Biology, College of Life Sciences, South-China Agricultural University, Guangzhou, 510642, China.	click here	click here	click here	click here	journal
29463822	10.1038/s41598-018-21697-z	True gene-targeting events by CRISPR/Cas-induced DSB repair of the PPO locus with an ectopically integrated repair template.	In recent years, several tools have become available for improved gene-targeting (GT) in plants. DNA breaks at specific sites activate local DNA repair and recombination, including recombination with ectopic sequences leading to GT. Large-scale transformation with the repair template can be avoided by pre-insertion of the repair template in the genome and liberation by sequence-specific nucleases…	eng	Scientific reports	Sci Rep	101563288	2018	Feb		8	1	3338	Internet	Sylvia de Pater	de Pater, S; Klemann, BJPM; Hooykaas, PJJ	Department of Molecular and Developmental Genetics, Institute of Biology, Leiden University, Leiden, 2333 BE, The Netherlands. b.s.de.pater@biology.leidenuniv.nl.	click here	click here	click here	click here	journal
27780343	10.1165/rcmb.2016-0301PS	Gene Editing and Genetic Lung Disease. Basic Research Meets Therapeutic Application.	Although our understanding of the genetics and pathology of congenital lung diseases such as surfactant protein deficiency, cystic fibrosis, and alpha-1 antitrypsin deficiency is extensive, treatment options are lacking. Because the lung is a barrier organ in direct communication with the external environment, targeted delivery of gene corrective technologies to the respiratory system via intratr…	eng	American journal of respiratory cell and molecular biology	Am J Respir Cell Mol Biol	8917225	2017	03		56	3	283-290	Internet	Deepthi Alapati	Alapati, D; Morrisey, EE	1 Department of Pediatrics, Nemours, Alfred I. duPont Hospital for Children, Wilmington, Delaware.	click here	click here	click here	click here	journal
28643254	10.1007/978-1-4939-7128-2_10	Gene Targeting in Rabbits: Single-Step Generation of Knock-out Rabbits by Microinjection of CRISPR/Cas9 Plasmids.	The development of genome editing technology has allowed gene disruptions to be achieved in various animal species and has been beneficial to many mammals. Gene disruption using pluripotent stem cells is difficult to achieve in rabbits, but thanks to advances in genome editing technology, a number of gene disruptions have been conducted. This paper describes a simple and easy method for carrying …	eng	Methods in molecular biology (Clifton, N.J.)	Methods Mol Biol	9214969	2017			1630		109-120	Internet	Yoshihiro Kawano	Kawano, Y; Honda, A	Organization for Promotion of Tenure Track, University of Miyazaki, 5200, Kibara, Kiyotake, Miyazaki, 889-1692, Japan.	click here	click here	click here	click here	journal
28071690	10.1038/srep40176	Generation of germline ablated male pigs by CRISPR/Cas9 editing of the NANOS2 gene.	Genome editing tools have revolutionized the generation of genetically modified animals including livestock. In particular, the domestic pig is a proven model of human physiology and an agriculturally important species. In this study, we utilized the CRISPR/Cas9 system to edit the NANOS2 gene in pig embryos to generate offspring with mono-allelic and bi-allelic mutations. We found that NANOS2 kno…	eng	Scientific reports	Sci Rep	101563288	2017	Jan		7		40176	Internet	Ki-Eun Park	Park, KE; Kaucher, AV; Powell, A; Waqas, MS; Sandmaier, SE; Oatley, MJ; Park, CH; Tibary, A; Donovan, DM; Blomberg, LA; Lillico, SG; Whitelaw, CB; Mileham, A; Telugu, BP; Oatley, JM	Department of Animal and Avian Sciences, University of Maryland, College Park, MD 20742, USA.	click here	click here	click here	click here	journal
28008926	10.1038/cr.2016.156	Long-term propagation of tree shrew spermatogonial stem cells in culture and successful generation of transgenic offspring.	Tree shrews have a close relationship to primates and have many advantages over rodents in biomedical research. However, the lack of gene manipulation methods has hindered the wider use of this animal. Spermatogonial stem cells (SSCs) have been successfully expanded in culture to permit sophisticated gene editing in the mouse and rat. Here, we describe a culture system for the long-term expansion…	eng	Cell research	Cell Res	9425763	2017	Feb		27	2	241-252	Internet	Chao-Hui Li	Li, CH; Yan, LZ; Ban, WZ; Tu, Q; Wu, Y; Wang, L; Bi, R; Ji, S; Ma, YH; Nie, WH; Lv, LB; Yao, YG; Zhao, XD; Zheng, P	State Key Laboratory of Genetic Resources and Evolution, Kunming Institute of Zoology, Chinese Academy of Sciences, Kunming 650223, China.	click here	click here	click here	click here	journal
28786539	10.1002/biot.201600644	Recent Developments on Genetic Engineering of Microalgae for Biofuels and Bio-Based Chemicals.	Microalgae serve as a promising source for the production of biofuels and bio-based chemicals. They are superior to terrestrial plants as feedstock in many aspects and their biomass is naturally rich in lipids, carbohydrates, proteins, pigments, and other valuable compounds. Due to the relatively slow growth rate and high cultivation cost of microalgae, to screen efficient and robust microalgal s…	eng	Biotechnology journal	Biotechnol J	101265833	2017	Oct		12	10		Internet	I-Son Ng	Ng, IS; Tan, SI; Kao, PH; Chang, YK; Chang, JS	Department of Chemical Engineering, National Cheng Kung University, Tainan, 70101, Taiwan.	click here	click here	click here	click here	journal
27747971	10.1111/tpj.13399	Discovery of rice essential genes by characterizing a CRISPR-edited mutation of closely related rice MAP kinase genes.	The clustered regularly interspaced short palindromic repeat (CRISPR)/CRISPR-associated protein 9 nuclease (Cas9) system depends on a guide RNA (gRNA) to specify its target. By efficiently co-expressing multiple gRNAs that target different genomic sites, the polycistronic tRNA-gRNA gene (PTG) strategy enables multiplex gene editing in the family of closely related mitogen-activated protein kinase…	eng	The Plant journal : for cell and molecular biology	Plant J	9207397	2017	Feb		89	3	636-648	Internet	Bastian Minkenberg	Minkenberg, B; Xie, K; Yang, Y	Intercollege Graduate Degree Program in Plant Biology, The Huck Institutes of the Life Sciences, The Pennsylvania State University, University Park, PA, 16802, USA.	click here	click here	click here	click here	journal
28676963	10.1007/s00299-017-2172-6	Knocking out of carotenoid catabolic genes in rice fails to boost carotenoid accumulation, but reveals a mutation in strigolactone biosynthesis.	Targeted mutations in five carotenoid catabolism genes failed to boost carotenoid accumulation in rice seeds, but produced dwarf and high tillering mutants when OsCCD7 gene was knocked out. Carotenoids play an important role in human diet as a source of vitamin A. Rice is a major staple food in Asia, but does not accumulate carotenoids in the endosperm because of the low carotenoid biosynthesis o…	eng	Plant cell reports	Plant Cell Rep	9880970	2017	Oct		36	10	1533-1545	Internet	Xiaoyu Yang	Yang, X; Chen, L; He, J; Yu, W	Guangdong Provincial Key Laboratory for Plant Epigenetics, College of Life Sciences, Shenzhen University, Shenzhen, 518060, China.	click here	click here	click here	click here	journal
28712495	10.1016/bs.pmbts.2017.03.012	On Improving CRISPR for Editing Plant Genes: Ribozyme-Mediated Guide RNA Production and Fluorescence-Based Technology for Isolating Transgene-Free Mutants Generated by CRISPR.	CRISPR/Cas9-mediated genome editing technology has been used to successfully edit numerous genes in various organisms including plants. There are still two major challenges in using CRISPR/Cas9 technology for gene editing in plants. First, there are very limited choices of promoters that are suitable for in vivo production of single-guide RNAs (sgRNAs), which is complementary to the target sequen…	eng	Progress in molecular biology and translational science	Prog Mol Biol Transl Sci	101498165	2017			149		151-166	Internet	Yubing He	He, Y; Wang, R; Dai, X; Zhao, Y	National Key Laboratory of Crop Genetic Improvement and National Center of Plant Gene Research (Wuhan), Huazhong Agricultural University, Wuhan, China.	click here	click here	click here	click here	journal
28049122	10.1093/pcp/pcw222	Generation of Gene-Edited Chrysanthemum morifolium Using Multicopy Transgenes as Targets and Markers.	The most widely used gene editing technology-the CRISPR/Cas9 system-employs a bacterial monomeric DNA endonuclease known as clustered regularly interspaced short palindromic repeats (CRISPR)-associated protein 9 (Cas9) and single-guide RNA (sgRNA) that directs Cas9 to a complementary target DNA. However, introducing mutations into higher polyploid plant species, especially for species without gen…	eng	Plant & cell physiology	Plant Cell Physiol	9430925	2017	02		58	2	216-226	Internet	Mitsuko Kishi-Kaboshi	Kishi-Kaboshi, M; Aida, R; Sasaki, K	Disease Resistant Crops Research Unit, National Institute of Agrobiological Sciences, Tsukuba, Ibaraki, Japan.	click here	click here	click here	click here	journal
28905515	10.1111/pbi.12832	CRISPR/Cas9-mediated efficient targeted mutagenesis in grape in the first generation.	The clustered regularly interspaced short palindromic repeats-associated protein 9 (CRISPR/Cas9) system is a powerful tool for editing plant genomes. Efficient genome editing of grape (Vitis vinifera) suspension cells using the type II CRISPR/Cas9 system has been demonstrated; however, it has not been established whether this system can be applied to get biallelic mutations in the first generatio…	eng	Plant biotechnology journal	Plant Biotechnol J	101201889	2017	Sep					Internet	Xianhang Wang	Wang, X; Tu, M; Wang, D; Liu, J; Li, Y; Li, Z; Wang, Y; Wang, X	State Key Laboratory of Crop Stress Biology in Arid Areas, College of Horticulture, Northwest A&F University, Yangling, Shaanxi, China.	click here	click here	click here	click here	journal
29250878	10.1111/pbi.12872	Precise editing of CLAVATA genes in Brassica napus L. regulates multilocular silique development.	Multilocular silique is a desirable agricultural trait with great potential for the development of high-yield varieties of Brassica. To date, no spontaneous or induced multilocular mutants have been reported in Brassica napus, which likely reflects its allotetraploid nature and the extremely low probability of the simultaneous random mutagenesis of multiple gene copies with functional redundancy.…	eng	Plant biotechnology journal	Plant Biotechnol J	101201889	2017	Dec					Internet	Yang Yang	Yang, Y; Zhu, K; Li, H; Han, S; Meng, Q; Khan, SU; Fan, C; Xie, K; Zhou, Y	National Key Laboratory of Crop Genetic Improvement, Huazhong Agricultural University, Wuhan, China.	click here	click here	click here	click here	journal
29233900	10.1128/mBio.01986-17	Systematic CRISPR-Cas9-Mediated Modifications ofPlasmodium yoeliiApiAP2 Genes Reveal Functional Insights into Parasite Development.	Malaria parasites have a complex life cycle with multiple developmental stages in mosquito and vertebrate hosts, and different developmental stages express unique sets of genes. Unexpectedly, many transcription factors (TFs) commonly found in eukaryotic organisms are absent in malaria parasites; instead, a family of genes encoding proteins similar to the plant Apetala2 (ApiAP2) transcription fact…	eng	mBio	MBio	101519231	2017	Dec		8	6		Internet	Cui Zhang	Zhang, C; Li, Z; Cui, H; Jiang, Y; Yang, Z; Wang, X; Gao, H; Liu, C; Zhang, S; Su, XZ; Yuan, J	State Key Laboratory of Cellular Stress Biology, Innovation Center for Cell Signaling Network, School of Life Sciences, Xiamen University, Xiamen, Fujian, China.	click here	click here	click here	click here	journal
28396675	10.3389/fpls.2017.00403	Inactivation of the β(1,2)-xylosyltransferase and the α(1,3)-fucosyltransferase genes inNicotiana tabacumBY-2 Cells by a Multiplex CRISPR/Cas9 Strategy Results in Glycoproteins without Plant-Specific Glycans.	Plants or plant cells can be used to produce pharmacological glycoproteins such as antibodies or vaccines. However these proteins carryN-glycans with plant-typical residues [β(1,2)-xylose and core α(1,3)-fucose], which can greatly impact the immunogenicity, allergenicity, or activity of the protein. Two enzymes are responsible for the addition of plant-specific glycans: β(1,2)-xylosyltransferase …	eng	Frontiers in plant science	Front Plant Sci	101568200	2017			8		403	Print	Sébastien Mercx	Mercx, S; Smargiasso, N; Chaumont, F; De Pauw, E; Boutry, M; Navarre, C	Institut des Sciences de la Vie, Université catholique de Louvain Louvain-la-Neuve, Belgium.	click here	click here	click here	click here	journal
27475852	10.1016/bs.ctdb.2016.04.006	The Genetic Regulation of Cell Fate During Preimplantation Mouse Development.	The adult body is estimated to contain several hundred distinct cell types, each with a specialized physiological function. Failure to maintain cell fate can lead to devastating diseases and cancer, but understanding how cell fates are assigned and maintained during animal development provides new opportunities for human health intervention. The mouse is a premier model for evaluating the genetic…	eng	Current topics in developmental biology	Curr Top Dev Biol	0163114	2016			120		173-202	Internet	A A Lokken	Lokken, AA; Ralston, A	Michigan State University, East Lansing, MI, United States.	click here	click here	click here	click here	journal
26516165	10.1177/0192623315613160	Meganucleases Revolutionize the Production of Genetically Engineered Pigs for the Study of Human Diseases.	Animal models of human diseases are critically necessary for developing an in-depth knowledge of disease development and progression. In addition, animal models are vital to the development of potential treatments or even cures for human diseases. Pigs are exceptional models as their size, physiology, and genetics are closer to that of humans than rodents. In this review, we discuss the use of pi…	eng	Toxicologic pathology	Toxicol Pathol	7905907	2016	Apr		44	3	428-33	Internet	Bethany K Redel	Redel, BK; Prather, RS	Division of Animal Science, University of Missouri, Columbia, Missouri, USA.	click here	click here	click here	click here	journal
26814166	10.1038/srep19969	Precision Medicine: Genetic Repair of Retinitis Pigmentosa in Patient-Derived Stem Cells.	Induced pluripotent stem cells (iPSCs) generated from patient fibroblasts could potentially be used as a source of autologous cells for transplantation in retinal disease. Patient-derived iPSCs, however, would still harbor disease-causing mutations. To generate healthy patient-derived cells, mutations might be repaired with new gene-editing technology based on the bacterial system of clustered re…	eng	Scientific reports	Sci Rep	101563288	2016	Jan		6		19969	Internet	Alexander G Bassuk	Bassuk, AG; Zheng, A; Li, Y; Tsang, SH; Mahajan, VB	Department of Pediatrics, University of Iowa, Iowa City, IA, USA.	click here	click here	click here	click here	journal
27399419	10.1227/01.neu.0000489710.06584.6a	140 Genome-wide CRISPR/cas9 Knockout Screens in Human Glioblastoma Identify Genetic Vulnerabilities.	Glioblastoma is the most common primary brain tumor with a poor prognosis. Identifying the genetic vulnerabilities of cancer is a novel method for discovering new cancer therapeutic targets. The genetic vulnerabilities of glioblastoma are poorly understood, however. The recent CRISPR/cas9 genetic knockout approach has been proposed as a useful method for high-throughput screening of such genetic …	eng	Neurosurgery	Neurosurgery	7802914	2016	Aug		63 Suppl 1		157	Internet	Imran Noorani	Noorani, I		click here	click here	click here	click here	journal
27530326	10.1158/0008-5472.CAN-16-1272	CRISPR/Cas9-Mediated Trp53 and Brca2 Knockout to Generate Improved Murine Models of Ovarian High-Grade Serous Carcinoma.	There is a need for transplantable murine models of ovarian high-grade serous carcinoma (HGSC) with regard to mutations in the human disease to assist investigations of the relationships between tumor genotype, chemotherapy response, and immune microenvironment. In addressing this need, we performed whole-exome sequencing of ID8, the most widely used transplantable model of ovarian cancer, coveri…	eng	Cancer research	Cancer Res	2984705R	2016	10		76	20	6118-6129	Internet	Josephine Walton	Walton, J; Blagih, J; Ennis, D; Leung, E; Dowson, S; Farquharson, M; Tookman, LA; Orange, C; Athineos, D; Mason, S; Stevenson, D; Blyth, K; Strathdee, D; Balkwill, FR; Vousden, K; Lockley, M; McNeish, IA	Wolfson Wohl Cancer Research Centre, Institute of Cancer Sciences, University of Glasgow, Glasgow, United Kingdom. Centre for Cancer and Inflammation, Barts Cancer Institute, Queen Mary University of London, London, United Kingdom.	click here	click here	click here	click here	journal
27587399	10.1074/jbc.M116.730655	Epithelial Expression of Human ABO Blood Group Genes Is Dependent upon a Downstream Regulatory Element Functioning through an Epithelial Cell-specific Transcription Factor, Elf5.	The human ABO blood group system is of great importance in blood transfusion and organ transplantation. The ABO system is composed of complex carbohydrate structures that are biosynthesized by A- and B-transferases encoded by the ABO gene. However, the mechanisms regulating ABO gene expression in epithelial cells remain obscure. On the basis of DNase I-hypersensitive sites in and around ABO in ep…	eng	The Journal of biological chemistry	J Biol Chem	2985121R	2016	Oct		291	43	22594-22606	Internet	Rie Sano	Sano, R; Nakajima, T; Takahashi, Y; Kubo, R; Kobayashi, M; Takahashi, K; Takeshita, H; Ogasawara, K; Kominato, Y	From the Department of Legal Medicine, Gunma University Graduate School of Medicine, Maebashi, 371-8511 Japan, takagirie@gunma-u.ac.jp.	click here	click here	click here	click here	journal
27708159	10.1073/pnas.1614467113	Insulin resistance and diabetes caused by genetic or diet-induced KBTBD2 deficiency in mice.	We describe a metabolic disorder characterized by lipodystrophy, hepatic steatosis, insulin resistance, severe diabetes, and growth retardation observed in mice carrying N-ethyl-N-nitrosourea (ENU)-induced mutations. The disorder was ascribed to a mutation of kelch repeat and BTB (POZ) domain containing 2 (Kbtbd2) and was mimicked by a CRISPR/Cas9-targeted null allele of the same gene. Kbtbd2 enc…	eng	Proceedings of the National Academy of Sciences of the United States of America	Proc Natl Acad Sci U S A	7505876	2016	10		113	42	E6418-E6426	Internet	Zhao Zhang	Zhang, Z; Turer, E; Li, X; Zhan, X; Choi, M; Tang, M; Press, A; Smith, SR; Divoux, A; Moresco, EM; Beutler, B	Center for the Genetics of Host Defense, University of Texas Southwestern Medical Center, Dallas, TX 75390.	click here	click here	click here	click here	journal
27100221	10.1007/s11248-016-9958-0	Silencing porcine genes significantly reduces human-anti-pig cytotoxicity profiles: an alternative to direct complement regulation.	The future of solid organ transplantation is challenged by an increasing shortage of available allografts. Xenotransplantation of genetically modified porcine organs offers an answer to this problem. Strategies of genetic modification have 'humanized' the porcine model towards clinical relevance. Most notably, these approaches have aimed at either antigen reduction or human transgene expression. …	eng	Transgenic research	Transgenic Res	9209120	2016	10		25	5	751-9	Internet	James R Butler	Butler, JR; Martens, GR; Estrada, JL; Reyes, LM; Ladowski, JM; Galli, C; Perota, A; Cunningham, CM; Tector, M; Joseph Tector, A	Department of Surgery, Indiana University School of Medicine, UH 4601 550 N. University Blvd, Indianpolis, IN, 46202, USA.	click here	click here	click here	click here	journal
27586692	10.1038/srep32565	Efficient Production of Gene-Modified Mice using Staphylococcus aureus Cas9.	The CRISPR/Cas system is an efficient genome-editing tool to modify genes in mouse zygotes. However, only the Streptococcus pyogenes Cas9 (SpCas9) has been systematically tested for generating gene-modified mice. The protospacer adjacent motif (PAM, 5'-NGG-3') recognized by SpCas9 limits the number of potential target sites for this system. Staphylococcus aureus Cas9 (SaCas9), with its smaller si…	eng	Scientific reports	Sci Rep	101563288	2016	Sep		6		32565	Internet	Xiya Zhang	Zhang, X; Liang, P; Ding, C; Zhang, Z; Zhou, J; Xie, X; Huang, R; Sun, Y; Sun, H; Zhang, J; Xu, Y; Songyang, Z; Huang, J	State Key Laboratory of Ophthalmology, Zhongshan Ophthalmic Center, Sun Yat-sen University, Guangzhou, 510275, China.	click here	click here	click here	click here	journal
27655312	10.16288/j.yczz.16-205	Research advances on animal genetics in China in 2015.	Chinese scientists have made significant achievements in the field of animal genetics in 2015. Incomplete statistics show that among all the publications of 2015 involving nematode (Caenorhabditis elegans), fly (Drosophila melanogaster), zebrafish (Danio rerio), African clawed frog (Xenopus) or mice (Mus musculus), about 1/5 publications are from China. Many innovative studies were published in h…	eng	Yi chuan = Hereditas	Yi Chuan	9436478	2016	06		38	6	467-507	Print	Bo Zhang	Zhang, B; Chen, XF; Huang, X; Yang, X	Key Laboratory of Cell Proliferation and Differentiation of Ministry of Education, College of Life Sciences, Peiking University, Beijing 100871, China.	click here	click here	click here	click here	journal
27097775	10.1038/srep24765	CRISPR/Cas9-mediated efficient and heritable targeted mutagenesis in tomato plants in the first and later generations.	The CRISPR/Cas9 system has successfully been used in various organisms for precise targeted gene editing. Although it has been demonstrated that CRISPR/Cas9 system can induce mutation in tomato plants, the stability of heredity in later generations and mutant specificity induced by the CRISPR/Cas9 system in tomato plants have not yet been elucidated in detail. In this study, two genes, SlPDS and …	eng	Scientific reports	Sci Rep	101563288	2016	Apr		6		24765	Internet	Changtian Pan	Pan, C; Ye, L; Qin, L; Liu, X; He, Y; Wang, J; Chen, L; Lu, G	Key Laboratory of Horticultural Plant Growth, Development and Quality Improvement, Ministry of Agriculture, Hangzhou 310058, China.	click here	click here	click here	click here	journal
27167304	10.3791/53843	High-throughput CRISPR Vector Construction and Characterization of DNA Modifications by Generation of Tomato Hairy Roots.	Targeted DNA mutations generated by vectors with clustered regularly interspaced short palindromic repeats (CRISPR)/Cas9 technology have proven useful for functional genomics studies. While most cloning strategies are simple to perform, they generally use multiple steps and can require several days to generate the ultimate constructs. The method presented here is based on DNA assembly and can pro…	eng	Journal of visualized experiments : JoVE	J Vis Exp	101313252	2016	Apr			110		Internet	Thomas B Jacobs	Jacobs, TB; Martin, GB	Boyce Thompson Institute for Plant Research; tbj26@cornell.edu.	click here	click here	click here	click here	journal
27066031	10.3389/fpls.2016.00377	Reassessment of the Four Yield-related Genes Gn1a, DEP1, GS3, and IPA1 in Rice Using a CRISPR/Cas9 System.	Clustered Regularly Interspaced Short Palindromic Repeats (CRISPR)-associated (Cas) systems have been successfully used as efficient tools for genome editing in a variety of species. We used the CRISPR/Cas9 system to mutate the Gn1a (Os01g0197700), DEP1 (Os09g0441900), GS3 (Os03g0407400), and IPA1 (Os08g0509600) genes of rice cultivar Zhonghua 11, genes which have been reported to function as reg…	eng	Frontiers in plant science	Front Plant Sci	101568200	2016			7		377	Print	Meiru Li	Li, M; Li, X; Zhou, Z; Wu, P; Fang, M; Pan, X; Lin, Q; Luo, W; Wu, G; Li, H	Key Laboratory of Plant Resources Conservation and Sustainable Utilization, South China Botanical Garden, Chinese Academy of SciencesGuangzhou, China; Guangdong Provincial Key Laboratory of Applied Botany, South China Botanical Garden, Chinese Academy of SciencesGuangzhou, China.	click here	click here	click here	click here	journal
27613750	10.1534/g3.116.033266	Simple and Efficient Targeting of Multiple Genes Through CRISPR-Cas9 in Physcomitrella patens.	Powerful genome editing technologies are needed for efficient gene function analysis. The CRISPR-Cas9 system has been adapted as an efficient gene knock-out-technology in a variety of species. However, in a number of situations knocking out or modifying a single gene is not sufficient, this is particularly true for genes belonging to a common family or for genes showing redundant functions. Like …	eng	G3 (Bethesda, Md.)	G3 (Bethesda)	101566598	2016	Sep					Internet	Mauricio Lopez-Obando	Lopez-Obando, M; Hoffmann, B; Géry, C; Guyon-Debast, A; Téoulé, E; Rameau, C; Bonhomme, S; Nogué, F	Institut Jean-Pierre Bourgin.	click here	click here	click here	click here	journal
27630657	10.3389/fpls.2016.01333	Efficient Inactivation of Symbiotic Nitrogen Fixation Related Genes in Lotus japonicus Using CRISPR-Cas9.	The targeted genome editing technique, CRISPR/Cas9 system, has been widely used to modify genes of interest in a predictable and precise manner. In this study, we describe the CRISPR/Cas9-mediated efficient editing of representative SNF (symbiotic nitrogen fixation) related genes in the model legume Lotus japonicus via Agrobacterium-mediated stable or hairy root transformation. We first predicted…	eng	Frontiers in plant science	Front Plant Sci	101568200	2016			7		1333	Print	Longxiang Wang	Wang, L; Wang, L; Tan, Q; Fan, Q; Zhu, H; Hong, Z; Zhang, Z; Duanmu, D	State Key Laboratory of Agricultural Microbiology, Huazhong Agricultural University Wuhan, China.	click here	click here	click here	click here	journal
26661595	10.1007/s00299-015-1900-z	A multiplex CRISPR/Cas9 platform for fast and efficient editing of multiple genes in Arabidopsis.	The recently developed CRISPR/Cas9 system is a promising technology for targeted genome editing in a variety of species including plants. However, the first generation systems were designed to target one or two gene loci at a time. We designed a new multiplex CRISPR/Cas9 system that allows the co-expression of six sgRNA modules in one binary vector using a simple (three steps) cloning strategy in…	eng	Plant cell reports	Plant Cell Rep	9880970	2016	Jul		35	7	1519-33	Internet	Zhengjing Zhang	Zhang, Z; Mao, Y; Ha, S; Liu, W; Botella, JR; Zhu, JK	Shanghai Center for Plant Stress Biology, Chinese Academy of Sciences, Shanghai, 200032, China.	click here	click here	click here	click here	journal
28127299	10.3389/fpls.2016.02036	Building a Genetic Manipulation Tool Box for Orchid Biology: Identification of Constitutive Promoters and Application of CRISPR/Cas9 in the Orchid,Dendrobium officinale.	Orchidaceae is the second largest family of flowering plants, which is highly valued for its ornamental purposes and medicinal uses.Dendrobium officinaleis a special orchid species that can grow without seed vernalization. Because the whole-genome sequence ofD. officinaleis publicly available, this species is poised to become a convenient research model for the evolutionary, developmental, and ge…	eng	Frontiers in plant science	Front Plant Sci	101568200	2016			7		2036	Print	Ling Kui	Kui, L; Chen, H; Zhang, W; He, S; Xiong, Z; Zhang, Y; Yan, L; Zhong, C; He, F; Chen, J; Zeng, P; Zhang, G; Yang, S; Dong, Y; Wang, W; Cai, J	State Key Laboratory of Genetic Resources and Evolution, Kunming Institute of Zoology, Chinese Academy of Sciences Kunming, China.	click here	click here	click here	click here	journal
27472659	10.1080/15592324.2016.1215794	The broad roles of CBF genes: From development to abiotic stress.	Cold acclimation is an important adaptive response of plants from temperate regions to increase their freezing tolerance after being exposed to low nonfreezing temperatures. The three CBF genes are well known to be involved in cold acclimation. As the 3 CBF genes are linked tandemly in the Arabidopsis genome, it is almost impossible to obtain cbf triple mutants using traditional genetic methods. …	eng	Plant signaling & behavior	Plant Signal Behav	101291431	2016	Aug		11	8	e1215794	Internet	Chunzhao Zhao	Zhao, C; Zhu, JK	a Shanghai Center for Plant Stress Biology, Shanghai Institutes for Biological Sciences, Chinese Academy of Sciences , Shanghai , China.	click here	click here	click here	click here	journal
25517294	10.1089/scd.2014.0347	Improved hematopoietic differentiation efficiency of gene-corrected beta-thalassemia induced pluripotent stem cells by CRISPR/Cas9 system.	The generation of beta-thalassemia (β-Thal) patient-specific induced pluripotent stem cells (iPSCs), subsequent homologous recombination-based gene correction of disease-causing mutations/deletions in the β-globin gene (HBB), and their derived hematopoietic stem cell (HSC) transplantation offers an ideal therapeutic solution for treating this disease. However, the hematopoietic differentiation ef…	eng	Stem cells and development	Stem Cells Dev	101197107	2015	May		24	9	1053-65	Internet	Bing Song	Song, B; Fan, Y; He, W; Zhu, D; Niu, X; Wang, D; Ou, Z; Luo, M; Sun, X	Key Laboratory for Major Obstetric Diseases of Guangdong Province, Key Laboratory of Reproduction and Genetics of Guangdong Higher Education Institutes, The Third Affiliated Hospital of Guangzhou Medical University , Guangzhou City, People's Republic of China .	click here	click here	click here	click here	journal
26576609	10.1051/medsci/20153111016	[The CRISPR system can correct or modify the expression of genes responsible for hereditary diseases].	A new technology, called CRISPR, derived from the immune system of bacteria, uses a Cas9 nuclease and a guided RNA complementary to a 20 nucleotides sequence of a gene to induce double strand DNA breaks. This permits to modify specifically the targeted gene in plant, animal and human cells. Variants of the technique also permit to reduce or increase the expression of a selected gene. This technol…	fre	Medecine sciences : M/S	Med Sci (Paris)	8710980	2015	Nov		31	11	1014-22	Internet	Jacques P Tremblay	Tremblay, JP	Département de Médecine Moléculaire, Faculté de Médecine, Université Laval, Centre de Recherche du CHU de Québec, 2705 boulevard Laurier, G1V Québec, Canada.	click here	click here	click here	click here	journal
25603988	10.1007/s11248-015-9862-z	Molecular scissors and their application in genetically modified farm animals.	Molecular scissors (MS), incl. Zinc Finger Nucleases (ZFN), Transcription-activator like endoncleases (TALENS) and meganucleases possess long recognition sites and are thus capable of cutting DNA in a very specific manner. These molecular scissors mediate targeted genetic alterations by enhancing the DNA mutation rate via induction of double-strand breaks at a predetermined genomic site. Compared…	eng	Transgenic research	Transgenic Res	9209120	2015	Jun		24	3	381-96	Internet	Bjoern Petersen	Petersen, B; Niemann, H	Institute of Farm Animal Genetics, Friedrich-Loeffler-Institut, Hoeltystrasse 10, 31535, Neustadt, Mariensee, Germany, bjoern.petersen@fli.bund.de.	click here	click here	click here	click here	journal
25596823	10.1007/s10577-014-9451-7	Advances in genetic modification of farm animals using zinc-finger nucleases (ZFN).	Genome editing tools (GET), including zinc-finger nucleases (ZFN), transcription activator-like endonucleases (TALENS), and meganucleases possess long recognition sites and are thus capable of cutting DNA in a very specific manner. These genome editing tools mediate targeted genetic alterations by enhancing DNA mutation frequency via induction of double-strand breaks at a predetermined genomic si…	eng	Chromosome research : an international journal on the molecular, supramolecular and evolutionary aspects of chromosome biology	Chromosome Res	9313452	2015	Feb		23	1	7-15	Internet	Bjoern Petersen	Petersen, B; Niemann, H	Institute of Farm Animal Genetics, Friedrich-Loeffler-Institut, Mariensee, Neustadt a. Rbge, Hoeltystrasse 10, Mariensee, 31535, Neustadt, Germany, bjoern.petersen@fli.bund.de.	click here	click here	click here	click here	journal
26193631	10.1038/srep12217	Efficient CRISPR/Cas9-mediated Targeted Mutagenesis in Populus in the First Generation.	Recently, RNA-guided genome editing using the type II clustered regularly interspaced short palindromic repeats (CRISPR)-associated protein (Cas) system has been applied to edit the plant genome in several herbaceous plant species. However, it remains unknown whether this system can be used for genome editing in woody plants. In this study, we describe the genome editing and targeted gene mutatio…	eng	Scientific reports	Sci Rep	101563288	2015	Jul		5		12217	Internet	Di Fan	Fan, D; Liu, T; Li, C; Jiao, B; Li, S; Hou, Y; Luo, K	Key Laboratory of Eco-environments of Three Gorges Reservoir Region, Ministry of Education, Chongqing Key Laboratory of Transgenic Plant and Safety Control, Institute of Resources Botany, School of Life Sciences, Southwest University, Chongqing 400715, China.	click here	click here	click here	click here	journal
25269397	10.1007/s00425-014-2180-5	Site-directed mutagenesis in Arabidopsis thaliana using dividing tissue-targeted RGEN of the CRISPR/Cas system to generate heritable null alleles.	Dividing tissue-targeted site-directed mutagenesis using RGEN of CRISPR/Cas system produces heritable mutations in Arabidopsis thaliana. Site-directed genome engineering in higher plants has great potential for basic research and molecular breeding. Here, we describe a method for site-directed mutagenesis of the Arabidopsis nuclear genome that efficiently generates heritable mutations using the R…	eng	Planta	Planta	1250576	2015	Jan		241	1	271-84	Internet	Youbong Hyun	Hyun, Y; Kim, J; Cho, SW; Choi, Y; Kim, JS; Coupland, G	Max Planck Institute for Plant Breeding Research, 50829, Cologne, Germany.	click here	click here	click here	click here	journal
26496757	10.16288/j.yczz.15-303	Highly efficient CRISPR/Cas9-mediated targeted mutagenesis of multiple genes in Populus.	The typeⅡCRISPR/Cas9 system (Clustered regularly interspaced short palindromic repeats /CRISPR-associated 9) has been widely used in bacteria, yeast, animals and plants as a targeted genome editing technique. In previous work, we have successfully knocked out the endogenous phytoene dehydrogenase (PDS) gene in Populus tomentosa Carr. using this system. To study the effect of target design on the …	eng	Yi chuan = Hereditas	Yi Chuan	9436478	2015	10		37	10	1044-52	Print	Ting-ting Liu	Liu, TT; Fan, D; Ran, LY; Jiang, YZ; Liu, R; Luo, KM	Institute of Resources Botany, School of Life Sciences, Southwest University, Chongqing 400715, China.	click here	click here	click here	click here	journal
26632356	10.1080/15265161.2015.1104169	Engineering Values Into Genetic Engineering: A Proposed Analytic Framework for Scientific Social Responsibility.	Recent experiments have been used to "edit" genomes of various plant, animal and other species, including humans, with unprecedented precision. Furthermore, editing the Cas9 endonuclease gene with a gene encoding the desired guide RNA into an organism, adjacent to an altered gene, could create a "gene drive" that could spread a trait through an entire population of organisms. These experiments re…	eng	The American journal of bioethics : AJOB	Am J Bioeth	100898738	2015			15	12	18-24	Internet	Pamela L Sankar	Sankar, PL; Cho, MK	a University of Pennsylvania.	click here	click here	click here	click here	journal
26770740	10.1177/2050312114550375	A highly efficient method for generation of therapeutic quality human pluripotent stem cells by using naive induced pluripotent stem cells nucleus for nuclear transfer.	Even after several years since the discovery of human embryonic stem cells and induced pluripotent stem cells (iPSC), we are still unable to make any significant therapeutic benefits out of them such as cell therapy or generation of organs for transplantation. Recent success in somatic cell nuclear transfer (SCNT) made it possible to generate diploid embryonic stem cells, which opens up the way t…	eng	SAGE open medicine	SAGE Open Med	101624744	2014			2		2050312114550375	Print	Madhusudana Girija Sanal	Sanal, MG	Albert Einstein College of Medicine, Bronx, NY, USA.	click here	click here	click here	click here	journal
28604557	10.1097/CJI.0000000000000176	Antigen Presentation by Individually Transferred HLA Class I Genes in HLA-A, HLA-B, HLA-C Null Human Cell Line Generated Using the Multiplex CRISPR-Cas9 System.	Human leukocyte antigens (HLAs) are essential immune molecules that affect transplantation and adoptive immunotherapy. When hematopoietic stem cells or organs are transplanted with HLA-mismatched recipients, graft-versus-host disease or graft rejection can be induced by allogeneic immune responses. The function of each HLA allele has been studied using HLA-deficient cells generated from mutant ce…	eng	Journal of immunotherapy (Hagerstown, Md. : 1997)	J Immunother	9706083			2017 Jul/Aug	40	6	201-210	Internet	Cheol-Hwa Hong	Hong, CH; Sohn, HJ; Lee, HJ; Cho, HI; Kim, TG	*Departments of Microbiology †Catholic Hematopoietic Stem Cell Bank ‡Cancer Research Institute, College of Medicine, The Catholic University of Korea, Seoul, Korea.	click here	click here	click here	click here	journal
25178170	10.1111/xen.12131	Efficient generation of genetically distinct pigs in a single pregnancy using multiplexed single-guide RNA and carbohydrate selection.	Manipulating the pig genome to increase compatibility with human biology may facilitate the clinical application of xenotransplantation. Genetic modifications to pig cells have been made by sequential recombination in fetal fibroblasts and liver-derived cells followed by cross-breeding or somatic cell nuclear transfer. The generation of pigs for research or organ donation by these methods is slow…	eng	Xenotransplantation	Xenotransplantation	9438793			2015 Jan-Feb	22	1	20-31	Internet	Ping Li	Li, P; Estrada, JL; Burlak, C; Montgomery, J; Butler, JR; Santos, RM; Wang, ZY; Paris, LL; Blankenship, RL; Downey, SM; Tector, M; Tector, AJ	Department of Surgery, Indiana University School of Medicine, Indianapolis, IN, USA.	click here	click here	click here	click here	journal
25728481	10.1111/xen.12161	Evaluation of human and non-human primate antibody binding to pig cells lacking GGTA1/CMAH/β4GalNT2 genes.	Simultaneous inactivation of pig GGTA1 and CMAH genes eliminates carbohydrate xenoantigens recognized by human antibodies. The β4GalNT2 glycosyltransferase may also synthesize xenoantigens. To further characterize glycan-based species incompatibilities, we examined human and non-human primate antibody binding to cells derived from genetically modified pigs lacking these carbohydrate-modifying gen…	eng	Xenotransplantation	Xenotransplantation	9438793			2015 May-Jun	22	3	194-202	Internet	Jose L Estrada	Estrada, JL; Martens, G; Li, P; Adams, A; Newell, KA; Ford, ML; Butler, JR; Sidner, R; Tector, M; Tector, J	Department of Surgery, Indiana University School of Medicine, Indianapolis, IN, USA.	click here	click here	click here	click here	journal
29546443	10.1007/s00122-018-3083-9	Map-based cloning and characterization of Zea mays male sterility33 (ZmMs33) gene, encoding a glycerol-3-phosphate acyltransferase.	Map-based cloning of maize ms33 gene showed that ZmMs33 encodes a sn-2 glycerol-3-phosphate acyltransferase, the ortholog of rice OsGPAT3, and it is essential for male fertility in maize. Genetic male sterility has been widely studied for its biological significance and commercial value in hybrid seed production. Although many male-sterile mutants have been identified in maize (Zea mays L.), it i…	eng	TAG. Theoretical and applied genetics. Theoretische und angewandte Genetik	Theor Appl Genet	0145600	2018	Mar					Internet	Ke Xie	Xie, K; Wu, S; Li, Z; Zhou, Y; Zhang, D; Dong, Z; An, X; Zhu, T; Zhang, S; Liu, S; Li, J; Wan, X	Advanced Biotechnology and Application Research Center, School of Chemistry and Biological Engineering, University of Science and Technology Beijing, Beijing, 100024, China.	click here	click here	click here	click here	journal
27029610	10.1080/15592294.2016.1169351	ATRX binds to atypical chromatin domains at the 3' exons of zinc finger genes to preserve H3K9me3 enrichment.	ATRX is a SWI/SNF chromatin remodeler proposed to govern genomic stability through the regulation of repetitive sequences, such as rDNA, retrotransposons, and pericentromeric and telomeric repeats. However, few direct ATRX target genes have been identified and high-throughput genomic approaches are currently lacking for ATRX. Here we present a comprehensive ChIP-sequencing study of ATRX in multip…	eng	Epigenetics	Epigenetics	101265293	2016	06		11	6	398-414	Internet	David Valle-García	Valle-García, D; Qadeer, ZA; McHugh, DS; Ghiraldini, FG; Chowdhury, AH; Hasson, D; Dyer, MA; Recillas-Targa, F; Bernstein, E	a Departments of Oncological Sciences and Dermatology , Icahn School of Medicine at Mount Sinai , New York , NY , USA.	click here	click here	click here	click here	journal
25775469	10.1371/journal.pone.0120501	CRISPR/Cas9 as tool for functional study of genes involved in preimplantation embryo development.	The CRISPR/Cas9 system has proven to be an efficient gene-editing tool for genome modification of cells and organisms. However, the applicability and efficiency of this system in pig embryos have not been studied in depth. Here, we aimed to remove porcine OCT4 function as a model case using the CRISPR/Cas9 system. Injection of Cas9 and single-guide RNA (sgRNA) against OCT4 decreased the percentag…	eng	PloS one	PLoS One	101285081	2015			10	3	e0120501	Internet	Jeongwoo Kwon	Kwon, J; Namgoong, S; Kim, NH	Department of Animal Sciences, Chungbuk National University, Naesudong-ro, Seowon-gu, Cheongju-si 362-763, Chungcheongbuk-do, Korea.	click here	click here	click here	click here	journal
26762038		[Advances in genetic modification technologies].	Genetic modification technology is a new molecular tool for targeted genome modification. It includes zinc finger nucleases (ZFN) technology, transcription activator-like effector nucleases (TALEN) technology and clustered regularly interspaced short palindromic repeat (CRISPR)-associated (Cas) (CRISPR-Cas) nucleases technology. All of these nucleases create DNA double-strand breaks (DSB) at chro…	chi	Sheng wu gong cheng xue bao = Chinese journal of biotechnology	Sheng Wu Gong Cheng Xue Bao	9426463	2015	Aug		31	8	1162-74	Print	Baixue Zhang	Zhang, B; Sun, Q; Li, H		click here	click here	click here	click here	journal
29024000	10.1002/hep.29593	Myeloid Notch1 deficiency activates the RhoA/ROCK pathway and aggravates hepatocellular damage in mouse ischemic livers.	Notch signaling plays an emerging role in the regulation of immune cell development and function during inflammatory response. Activation of the ras homolog gene family member A/Rho-associated protein kinase (ROCK) pathway promotes leukocyte accumulation in tissue injury. However, it remains unknown whether Notch signaling regulates ras homolog gene family member A/ROCK-mediated immune responses …	eng	Hepatology (Baltimore, Md.)	Hepatology	8302946	2018	Mar		67	3	1041-1055	Internet	Ling Lu	Lu, L; Yue, S; Jiang, L; Li, C; Zhu, Q; Ke, M; Lu, H; Wang, X; Busuttil, RW; Ying, QL; Kupiec-Weglinski, JW; Ke, B	Liver Transplantation Center, First Affiliated Hospital, Nanjing Medical University, Nanjing, China.	click here	click here	click here	click here	journal
28430356	10.1002/jcp.25970	CRISPR/Cas9: An RNA-guided highly precise synthetic tool for plant genome editing.	CRISPR/Cas9 is a newly developed and naturally occurred genome editing tool, which is originally used by bacteria for immune defence. In the past years, it has been quickly employed and modified to precisely edit genome sequences in both plants and animals. Compared with the well-developed zinc finger nucleases (ZFNs) and transcription activator-like effector nucleases (TALENs), CRISPR/Cas9 has l…	eng	Journal of cellular physiology	J Cell Physiol	0050222	2018	Mar		233	3	1844-1859	Internet	Yeliz Demirci	Demirci, Y; Zhang, B; Unver, T	Izmir International Biomedicine and Genome Institute (iBG-izmir), Dokuz Eylul University, Izmir, Turkey.	click here	click here	click here	click here	journal
28800419	10.1016/j.copbio.2017.07.012	Genome editing and plant transformation of solanaceous food crops.	During the past decade, the ability to alter plant genomes in a DNA site-specific manner was realized through availability of sequenced genomes and emergence of editing technologies based on complexes that guide endonucleases. Generation of targeted DNA breaks by ZFNs, TALENs, and CRISPR/Cas9, then mending by repair mechanisms, provides a valuable foundation for studies of gene function and trait…	eng	Current opinion in biotechnology	Curr Opin Biotechnol	9100492	2018	Feb		49		35-41	Internet	Joyce Van Eck	Van Eck, J	The Boyce Thompson Institute, 533 Tower Rd., Ithaca, NY 14853, USA; Plant Breeding and Genetics Section, School of Integrative Plant Science, Cornell University, Ithaca, NY 14853, USA. Electronic address: jv27@cornell.edu.	click here	click here	click here	click here	journal
29509719	10.3390/biology7010021	Gene Editing of Microalgae: Scientific Progress and Regulatory Challenges in Europe.	It is abundantly clear that the development of gene editing technologies, represents a potentially powerful force for good with regard to human and animal health and addressing the challenges we continue to face in a growing global population. This now includes the development of approaches to modify microalgal strains for potential improvements in productivity, robustness, harvestability, proces…	eng	Biology	Biology (Basel)	101587988	2018	Mar		7	1		Print	Andrew Spicer	Spicer, A; Molnar, A	Algenuity, Eden Laboratory, Bedfordshire MK43 9ND, UK. aps@algenuity.com.	click here	click here	click here	click here	journal
28731201	10.1002/jcb.26303	A technological and regulatory outlook on CRISPR crop editing.	Generating plants with increased yields while maintaining low production and maintenance costs is highly important since plants are the major food source for humans and animals, as well as important producers of chemicals, pharmaceuticals, and fuels. Gene editing approaches, particularly the CRISPR-Cas system, are the preferred methods for improving crops, enabling quick, robust, and accurate gen…	eng	Journal of cellular biochemistry	J Cell Biochem	8205768	2018	Feb		119	2	1291-1298	Internet	Rea Globus	Globus, R; Qimron, U	Department of Clinical Microbiology and Immunology, Sackler School of Medicine, Tel Aviv University, Tel Aviv, Israel.	click here	click here	click here	click here	journal
29531752	10.1038/s41438-018-0023-4	A method for the production and expedient screening of CRISPR/Cas9-mediated non-transgenic mutant plants.	Developing CRISPR/Cas9-mediated non-transgenic mutants in asexually propagated perennial crop plants is challenging but highly desirable. Here, we report a highly useful method using anAgrobacterium-mediated transient CRISPR/Cas9 gene expression system to create non-transgenic mutant plants without the need for sexual segregation. We have also developed a rapid, cost-effective, and high-throughpu…	eng	Horticulture research	Hortic Res	101655540	2018			5		13	Print	Longzheng Chen	Chen, L; Li, W; Katin-Grazzini, L; Ding, J; Gu, X; Li, Y; Gu, T; Wang, R; Lin, X; Deng, Z; McAvoy, RJ; Gmitter, FG; Deng, Z; Zhao, Y; Li, Y	1Department of Plant Science and Landscape Architecture, University of Connecticut, Storrs, CT USA.	click here	click here	click here	click here	journal
29492697	10.1007/s00425-018-2866-1	Gene editing by CRISPR/Cas9 in the obligatory outcrossing Medicago sativa.	The CRISPR/Cas9 technique was successfully used to edit the genome of the obligatory outcrossing plant species Medicago sativa L. (alfalfa). RNA-guided genome engineering using Clustered Regularly Interspersed Short Palindromic Repeats (CRISPR)/Cas9 technology enables a variety of applications in plants. Successful application and validation of the CRISPR technique in a multiplex genome, such as …	eng	Planta	Planta	1250576	2018	Apr		247	4	1043-1050	Internet	Ruimin Gao	Gao, R; Feyissa, BA; Croft, M; Hannoufa, A	Agriculture and Agri-Food Canada, London, ON, Canada.	click here	click here	click here	click here	journal
28879855	10.21775/cimb.026.047	An Era of CRISPR/ Cas9 Mediated Plant Genome Editing.	Recently the engineered nucleases have revolutionized genome editing to perturb gene expression at specific sites in complex eukaryotic genomes. Three important classes of these genome editing tools are Moreover, the more recent type II Clustered Regularly Inter-spaced Short Palindromic Repeats/Crispr associated protein (CRISPR/Cas9) system has become the most favorite plant genome editing tool f…	eng	Current issues in molecular biology	Curr Issues Mol Biol	100931761	2018			26		47-54	Internet	Haris Khurshid	Khurshid, H; Jan, SA; Shinwari, ZK; Jamal, M; Shah, SH	Department of Biotechnology, Quaid-i-Azam University, Islamabad, Pakistan, and Oilseeds Research Program, National Agricultural Research Centre, Islamabad, Pakistan.	click here	click here	click here	click here	journal
29331077	10.1111/pbi.12884	Optimized paired-sgRNA/Cas9 cloning and expression cassette triggers high-efficiency multiplex genome editing in kiwifruit.	Kiwifruit is an important fruit crop; however, technologies for its functional genomic and molecular improvement are limited. The clustered regulatory interspaced short palindromic repeats (CRISPR)/CRISPR-associated protein (Cas) system has been successfully applied to genetic improvement in many crops, but its editing capability is variable depending on the different combinations of the syntheti…	eng	Plant biotechnology journal	Plant Biotechnol J	101201889	2018	Jan					Internet	Zupeng Wang	Wang, Z; Wang, S; Li, D; Zhang, Q; Li, L; Zhong, C; Liu, Y; Huang, H	Key Laboratory of Plant Resources Conservation and Sustainable Utilization, South China Botanical Garden, The Chinese Academy of Sciences, Guangzhou, Guangdong, China.	click here	click here	click here	click here	journal
29327444	10.1111/pbi.12879	Developing a flexible, high-efficiency Agrobacterium-mediated sorghum transformation system with broad application.	Sorghum is the fifth most widely planted cereal crop in the world and is commonly cultivated in arid and semi-arid regions such as Africa. Despite its importance as a food source, sorghum genetic improvement through transgenic approaches has been limited because of an inefficient transformation system. Here, we report a ternary vector (also known as cohabitating vector) system using a recently de…	eng	Plant biotechnology journal	Plant Biotechnol J	101201889	2018	Jan					Internet	Ping Che	Che, P; Anand, A; Wu, E; Sander, JD; Simon, MK; Zhu, W; Sigmund, AL; Zastrow-Hayes, G; Miller, M; Liu, D; Lawit, SJ; Zhao, ZY; Albertsen, MC; Jones, TJ	DuPont Pioneer, Johnston, IA, USA.	click here	click here	click here	click here	journal
29392354	10.1007/10_2017_52	Advances in Transcriptomics of Plants.	The current global population of 7.3 billion is estimated to reach 9.7 billion in the year 2050. Rapid population growth is driving up global food demand. Additionally, global climate change, environmental degradation, drought, emerging diseases, and salty soils are the current threats to global food security. In order to mitigate the adverse effects of these diverse agricultural productivity con…	eng	Advances in biochemical engineering/biotechnology	Adv Biochem Eng Biotechnol	8307733	2018	Feb					Print	Naghmeh Nejat	Nejat, N; Ramalingam, A; Mantri, N	The Pangenomics Group, School of Science, RMIT University, Melbourne, VIC, Australia.	click here	click here	click here	click here	journal
28386301	10.1007/s11816-017-0425-z	New traits in crops produced by genome editing techniques based on deletions.	One of the most promising New Plant Breeding Techniques is genome editing (also called gene editing) with the help of a programmable site-directed nuclease (SDN). In this review, we focus on SDN-1, which is the generation of small deletions or insertions (indels) at a precisely defined location in the genome with zinc finger nucleases (ZFN), TALENs, or CRISPR-Cas9. The programmable nuclease is us…	eng	Plant biotechnology reports	Plant Biotechnol Rep	101501730	2017			11	1	1-8	Print	C C M van de Wiel	van de Wiel, CCM; Schaart, JG; Lotz, LAP; Smulders, MJM	Wageningen University and Research, Wageningen, The Netherlands.	click here	click here	click here	click here	journal
28167025	10.1016/j.plantsci.2016.12.012	Genome editing as a tool to achieve the crop ideotype and de novo domestication of wild relatives: Case study in tomato.	The ideotype is a theoretical model of an archetypal cultivated plant. Recent progress in genome editing is aiding the pursuit of this ideal in crop breeding. Breeding is relatively straightforward when the traits in question are monogenic in nature and show Mendelian inheritance. Conversely, traits with a diffuse, polygenic basis such as abiotic stress resistance are more difficult to harness. I…	eng	Plant science : an international journal of experimental plant biology	Plant Sci	9882015	2017	Mar		256		120-130	Internet	Agustin Zsögön	Zsögön, A; Cermak, T; Voytas, D; Peres, LE	Laboratory of Molecular Plant Physiology, Departamento de Biologia Vegetal, Universidade Federal de Viçosa, 36570-900 Viçosa, MG, Brazil.	click here	click here	click here	click here	journal
28702937	10.1007/s13205-017-0870-y	Genetic engineering strategies for biotic and abiotic stress tolerance and quality enhancement in horticultural crops: a comprehensive review.	Genetic engineering technique offers myriads of applications in improvement of horticultural crops for biotic and abiotic stress tolerance, and produce quality enhancement. During last two decades, a large number of transgenic horticultural crops has been developed and more are underway. A number of genes including natural and synthetic Cry genes, protease inhibitors, trypsin inhibitors and cysta…	eng	3 Biotech	3 Biotech	101565857	2017	Aug		7	4	239	Print	Nehanjali Parmar	Parmar, N; Singh, KH; Sharma, D; Singh, L; Kumar, P; Nanjundan, J; Khan, YJ; Chauhan, DK; Thakur, AK	Dr. Y.S. Parmar University of Horticulture and Forestry, Nauni, Solan, HP, 173 230, India. nehanjalibtc@gmail.com.	click here	click here	click here	click here	journal
28443125	10.3389/fpls.2017.00539	Viral Vectors for Plant Genome Engineering.	Recent advances in genome engineering (GE) has made it possible to precisely alter DNA sequences in plant cells, providing specifically engineered plants with traits of interest. Gene targeting efficiency depends on the delivery-method of both sequence-specific nucleases and repair templates, to plant cells. Typically, this is achieved usingAgrobacteriummediated transformation or particle bombard…	eng	Frontiers in plant science	Front Plant Sci	101568200	2017			8		539	Print	Syed Shan-E-Ali Zaidi	Zaidi, SS; Mansoor, S	Molecular Virology and Gene Silencing Laboratory, Agricultural Biotechnology Division, National Institute for Biotechnology and Genetic EngineeringFaisalabad, Pakistan.	click here	click here	click here	click here	journal
28725230	10.3389/fpls.2017.01157	Genetics and Genomics of Cotton Leaf Curl Disease, Its Viral Causal Agents and Whitefly Vector: A Way Forward to Sustain Cotton Fiber Security.	Cotton leaf curl disease (CLCuD) after its first epidemic in 1912 in Nigeria, has spread to different cotton growing countries including United States, Pakistan, India, and China. The disease is of viral origin-transmitted by the whiteflyBemisia tabaci, which is difficult to control because of the prevalence of multiple virulent viral strains or related species. The problem is further complicated…	eng	Frontiers in plant science	Front Plant Sci	101568200	2017			8		1157	Print	Mehboob-Ur- Rahman	Rahman, MU; Khan, AQ; Rahmat, Z; Iqbal, MA; Zafar, Y	National Institute for Biotechnology and Genetic EngineeringFaisalabad, Pakistan.	click here	click here	click here	click here	journal
28167937	10.3389/fmicb.2017.00047	Antiviral Defenses in Plants through Genome Editing.	Plant-virus interactions based-studies have contributed to increase our understanding on plant resistance mechanisms, providing new tools for crop improvement. In the last two decades, RNA interference, a post-transcriptional gene silencing approach, has been used to induce antiviral defenses in plants with the help of genetic engineering technologies. More recently, the new genome editing system…	eng	Frontiers in microbiology	Front Microbiol	101548977	2017			8		47	Print	Gustavo Romay	Romay, G; Bragard, C	Applied Microbiology - Phytopathology, Earth and Life Institute, Université catholique de Louvain Louvain-la-Neuve, Belgium.	click here	click here	click here	click here	journal
29082718	10.13345/j.cjb.170171	[Recent progresses in CRISPR genome editing in plants].	In the past 4 years, CRISPR/Cas9-mediated genome editing becomes the revolutionary tool in life sciences. This tool enables us to edit plant genes with unprecedented throughput, scalability, speed and low cost. In addition to targeted knock-in and knock-out applications, CRISPR/Cas9 also provides an efficient platform for targeted gene activation and suppression. At the same time, accuracy, capac…	chi	Sheng wu gong cheng xue bao = Chinese journal of biotechnology	Sheng Wu Gong Cheng Xue Bao	9426463	2017	Oct		33	10	1700-1711	Print	Hong Li	Li, H; Xie, K	National Key Laboratory of Crop Genetic Improvement, Huazhong Agricultural University, Wuhan 430070, Hubei, China.	click here	click here	click here	click here	journal
29103811	10.1016/j.plaphy.2017.10.024	CRISPR-Cas9 based plant genome editing: Significance, opportunities and recent advances.	Precise genome editing is a quantum leap in the field of plant sciences. Clustered regularly interspaced short palindromic repeats (CRISPR) and its associated Cas9 protein have emerged as a powerful tool for precise genome editing. CRISPR-Cas9 system introduces small heritable mutations (indels) in the genome of an organism. This system also enables precise gene characterization in plants with co…	eng	Plant physiology and biochemistry : PPB	Plant Physiol Biochem	9882449	2017	Oct					Internet	Neelam Soda	Soda, N; Verma, L; Giri, J	National Institute of Plant Genome Research, Aruna Asaf Ali Marg, New Delhi 110067, India.	click here	click here	click here	click here	journal
28360425	10.1038/s41598-017-00501-4	Rapid breeding of parthenocarpic tomato plants using CRISPR/Cas9.	Parthenocarpy in horticultural crop plants is an important trait with agricultural value for various industrial purposes as well as direct eating quality. Here, we demonstrate a breeding strategy to generate parthenocarpic tomato plants using the CRISPR/Cas9 system. We optimized the CRISPR/Cas9 system to introduce somatic mutations effectively into SlIAA9-a key gene controlling parthenocarpy-with…	eng	Scientific reports	Sci Rep	101563288	2017	03		7	1	507	Internet	Risa Ueta	Ueta, R; Abe, C; Watanabe, T; Sugano, SS; Ishihara, R; Ezura, H; Osakabe, Y; Osakabe, K	Graduate School of Advanced Technology and Science, Tokushima University, Tokushima, Japan.	click here	click here	click here	click here	journal
28256553	10.1038/srep43320	Targeted mutagenesis in the medicinal plant Salvia miltiorrhiza.	CRISPR/Cas9 is a powerful genome editing tool that has been extensively used in model plants and crops, such as Arabidopsis thaliana, rice, wheat, and soybean. Here, we report the use of CRISPR/Cas9 to precisely knock out the committed diterpene synthase gene (SmCPS1) involved in tanshinone biosynthesis in Salvia miltiorrhiza, a traditional Chinese medicinal herb with significant pharmacological …	eng	Scientific reports	Sci Rep	101563288	2017	Mar		7		43320	Internet	Bin Li	Li, B; Cui, G; Shen, G; Zhan, Z; Huang, L; Chen, J; Qi, X	Hubei Key Laboratory of Natural Medicinal Chemistry and Resource Evaluation, School of Pharmacy, Tongji Medical College, Huazhong University of Science and Technology, Wuhan 430030, China.	click here	click here	click here	click here	journal
28548094	10.1038/ncomms15605	Targeted recombination between homologous chromosomes for precise breeding in tomato.	Homologous recombination (HR) between parental chromosomes occurs stochastically. Here, we report on targeted recombination between homologous chromosomes upon somatic induction of DNA double-strand breaks (DSBs) via CRISPR-Cas9. We demonstrate this via a visual and molecular assay whereby DSB induction between two alleles carrying different mutations in the PHYTOENE SYNTHASE (PSY1) gene results …	eng	Nature communications	Nat Commun	101528555	2017	May		8		15605	Internet	Shdema Filler Hayut	Filler Hayut, S; Melamed Bessudo, C; Levy, AA	Department of Plant and Environmental Sciences, Weizmann Institute of Science, Rehovot 76100, Israel.	click here	click here	click here	click here	journal
28585692	10.1111/nph.14625	OsGCD1 is essential for rice fertility and required for embryo dorsal-ventral pattern formation and endosperm development.	Rice fertility is critical for rice reproduction and is thus a focus of interest. Most studies have addressed male sterility and its relation to rice production. The mechanisms of regulation of embryogenesis and endosperm development are essential for rice reproduction, but remain largely unknown. Here, we report a functional analysis of the rice gene OsGCD1, which encodes a highly conserved homo…	eng	The New phytologist	New Phytol	9882884	2017	Aug		215	3	1039-1058	Internet	Xiaorong Huang	Huang, X; Peng, X; Sun, MX	College of Life Science, State Key Laboratory of Hybrid Rice, Wuhan University, Wuhan, 430072, China.	click here	click here	click here	click here	journal
28824692	10.3389/fpls.2017.01364	Genome Editing in Cotton with the CRISPR/Cas9 System.	Genome editing is an important tool for gene functional studies as well as crop improvement. The recent development of the CRISPR/Cas9 system using single guide RNA molecules (sgRNAs) to direct precise double strand breaks in the genome has the potential to revolutionize agriculture. Unfortunately, not all sgRNAs are equally efficient and it is difficult to predict their efficiency by bioinformat…	eng	Frontiers in plant science	Front Plant Sci	101568200	2017			8		1364	Print	Wei Gao	Gao, W; Long, L; Tian, X; Xu, F; Liu, J; Singh, PK; Botella, JR; Song, C	State Key Laboratory of Cotton Biology, Henan Key Laboratory of Plant Stress Biology, School of Life Sciences, Henan UniversityKaifeng, China.	click here	click here	click here	click here	journal
29163623	10.3389/fpls.2017.01910	Accession-DependentCBFGene Deletion by CRISPR/Cas System in Arabidopsis.	The CRISPR/Cas system became a powerful genome editing tool for basic plant research and crop improvement. Thus far, CRISPR/Cas has been applied to many plants, including Arabidopsis, rice and other crop plants. It has been reported that CRISPR/Cas efficiency is generally high in many plants. In this study, we compared the genome editing efficiency of CRISPR/Cas in three different Arabidopsis acc…	eng	Frontiers in plant science	Front Plant Sci	101568200	2017			8		1910	Print	Sungkyung Cho	Cho, S; Yu, SI; Park, J; Mao, Y; Zhu, JK; Yun, DJ; Lee, BH	Department of Life Science, Sogang University, Seoul, South Korea.	click here	click here	click here	click here	journal
28258551	10.1007/s11103-017-0599-3	CRISPR/Cas9-mediated targeted mutagenesis in upland cotton (Gossypium hirsutum L.).	The clustered, regularly interspaced, short palindromic repeats (CRISPR)/CRISPR associated (Cas)9 protein system has emerged as a simple and efficient tool for genome editing in eukaryotic cells. It has been shown to be functional in several crop species, yet there are no reports on the application of this or any other genome editing technologies in the cotton plant. Cotton is an important crop t…	eng	Plant molecular biology	Plant Mol Biol	9106343	2017	Jul		94	4-5	349-360	Internet	Madhusudhana R Janga	Janga, MR; Campbell, LM; Rathore, KS	Institute for Plant Genomics and Biotechnology, Texas A&M University, College Station, TX, 77843-2123, USA.	click here	click here	click here	click here	journal
28542349	10.1371/journal.pone.0177966	CRISPR/Cas9-mediated targeted mutagenesis in grape.	RNA-guided genome editing using the CRISPR/Cas9 CRISPR (clustered regularly interspaced short palindromic repeats)/Cas9 (CRISPR-associated protein 9) system has been applied successfully in several plant species. However, to date, there are few reports on the use of any of the current genome editing approaches in grape-an important fruit crop with a large market not only for table grapes but also…	eng	PloS one	PLoS One	101285081	2017			12	5	e0177966	Internet	Ikuko Nakajima	Nakajima, I; Ban, Y; Azuma, A; Onoue, N; Moriguchi, T; Yamamoto, T; Toki, S; Endo, M	Institute of Fruit Tree and Tea Science, National Agriculture and Food Research Organization, Fujimoto, Tsukuba, Ibaraki, Japan.	click here	click here	click here	click here	journal
29093724	10.3389/fpls.2017.01780	Efficient CRISPR/Cas9 Genome Editing ofPhytoene desaturasein Cassava.	CRISPR/Cas9 has become a powerful genome-editing tool for introducing genetic changes into crop species. In order to develop capacity for CRISPR/Cas9 technology in the tropical staple cassava (Manihot esculenta), thePhytoene desaturase(MePDS) gene was targeted in two cultivars using constructs carrying gRNAs targeting two sequences withinMePDSexon 13. AfterAgrobacterium-mediated delivery of CRISP…	eng	Frontiers in plant science	Front Plant Sci	101568200	2017			8		1780	Print	John Odipio	Odipio, J; Alicai, T; Ingelbrecht, I; Nusinow, DA; Bart, R; Taylor, NJ	Donald Danforth Plant Science Center, St. Louis, MO, United States.	click here	click here	click here	click here	journal
28883826	10.3389/fpls.2017.01441	Efficient CRISPR/Cas9-Mediated Genome Editing Using a Chimeric Single-Guide RNA Molecule.	The CRISPR/Cas9 system has been applied in diverse eukaryotic organisms for targeted mutagenesis. However, targeted gene editing is inefficient and requires the simultaneous delivery of a DNA template for homology-directed repair (HDR). Here, we used CRISPR/Cas9 to generate targeted double-strand breaks and to deliver an RNA repair template for HDR in rice (Oryza sativa). We used chimeric single-…	eng	Frontiers in plant science	Front Plant Sci	101568200	2017			8		1441	Print	Haroon Butt	Butt, H; Eid, A; Ali, Z; Atia, MAM; Mokhtar, MM; Hassan, N; Lee, CM; Bao, G; Mahfouz, MM	Laboratory for Genome Engineering, Division of Biological Sciences, King Abdullah University of Science and TechnologyThuwal, Saudi Arabia.	click here	click here	click here	click here	journal
29082721	10.13345/j.cjb.170169	[Genome editing technology and its application in forage legumes].	Genome editing is a novel targeted genome modification biotechnology, which could successfully mutate specific loci as well as generate gene replacement and insertion in various organisms. So far, genome editing technology has been widely applied in investigating gene function and developing valuable traits in both model plants and major crops. In this review, we briefly survey the historical dev…	chi	Sheng wu gong cheng xue bao = Chinese journal of biotechnology	Sheng Wu Gong Cheng Xue Bao	9426463	2017	Oct		33	10	1733-1743	Print	Huan Liu	Liu, H; Meng, Y; Niu, L; Lin, H	Biotechnology Research Institute, Chinese Academy of Agricultural Sciences, Beijing 100081, China.	click here	click here	click here	click here	journal
28790350	10.1038/s41598-017-07871-9	CRISPR/Cas9-mediated genome editing efficiently creates specific mutations at multiple loci using one sgRNA in Brassica napus.	CRISPR/Cas9 is a valuable tool for both basic and applied research that has been widely applied to different plant species. Nonetheless, a systematical assessment of the efficiency of this method is not available for the allotetraploid Brassica napus-an important oilseed crop. In this study, we examined the mutation efficiency of the CRISPR/Cas9 method for 12 genes and also determined the pattern…	eng	Scientific reports	Sci Rep	101563288	2017	Aug		7	1	7489	Internet	Hong Yang	Yang, H; Wu, JJ; Tang, T; Liu, KD; Dai, C	College of Plant Science & Technology, Huazhong Agricultural University, Wuhan, 430070, China.	click here	click here	click here	click here	journal
28712497	10.1016/bs.pmbts.2017.03.010	Use of CRISPR/Cas9 for Symbiotic Nitrogen Fixation Research in Legumes.	Nitrogen-fixing rhizobia have established a symbiotic relationship with the legume family through more than 60 million years of evolution. Hundreds of legume host genes are involved in the SNF (symbiotic nitrogen fixation) process, such as recognition of the bacterial partners, nodulation signaling and nodule development, maintenance of highly efficient nitrogen fixation within nodules, regulatio…	eng	Progress in molecular biology and translational science	Prog Mol Biol Transl Sci	101498165	2017			149		187-213	Internet	Longlong Wang	Wang, L; Wang, L; Zhou, Y; Duanmu, D	State Key Laboratory of Agricultural Microbiology, College of Life Science and Technology, Huazhong Agricultural University, Wuhan, China.	click here	click here	click here	click here	journal
28712493	10.1016/bs.pmbts.2017.05.003	CRISPR/Cas9-Enabled Multiplex Genome Editing and Its Application.	The CRISPR/Cas9 system is a prevalent and versatile genome-editing tool of choice for basic and applied biological research. An exchange of a 20-bp spacer sequence in the gRNA can easily reprogram Cas9 to target a different DNA site. By expressing or providing multiple gRNAs, the system also enables multiplex genome editing at high efficiencies. Current approaches for providing multiple gRNAs in …	eng	Progress in molecular biology and translational science	Prog Mol Biol Transl Sci	101498165	2017			149		111-132	Internet	Bastian Minkenberg	Minkenberg, B; Wheatley, M; Yang, Y	The Pennsylvania State University, University Park, PA, United States.	click here	click here	click here	click here	journal
28712498	10.1016/bs.pmbts.2017.03.005	Safety, Security, and Policy Considerations for Plant Genome Editing.	Genome editing with engineered nucleases (GEEN) is increasingly used as a tool for gene discovery and trait development in crops through generation of targeted changes in endogenous genes. The development of the CRISPR-Cas9 system (clustered regularly interspaced short palindromic repeats with associated Cas9 protein), in particular, has enabled widespread use of genome editing. Research to date …	eng	Progress in molecular biology and translational science	Prog Mol Biol Transl Sci	101498165	2017			149		215-241	Internet	Jeffrey D Wolt	Wolt, JD	Biosafety Institute for Genetically Modified Agricultural Products, Iowa State University, Ames, IA, United States; Crop Bioengineering Consortium, Iowa State University, Ames, IA, United States. Electronic address: jdwolt@iastate.edu.	click here	click here	click here	click here	journal
28659944	10.3389/fpls.2017.00993	OsSAPK2 Confers Abscisic Acid Sensitivity and Tolerance to Drought Stress in Rice.	SNF 1-RELATED PROTEIN KINASE 2 (SnRK2) is a family of plant-specific protein kinases which is the key regulator of hyper-osmotic stress signaling and abscisic acid (ABA)-dependent development in various plants. Among the rice subclass-I and -II SnRK2s, osmotic stress/ABA-activated protein kinase 2 (SAPK2) may be the primary mediator of ABA signaling. However, SAPK2 has not been comprehensively ch…	eng	Frontiers in plant science	Front Plant Sci	101568200	2017			8		993	Print	Dengji Lou	Lou, D; Wang, H; Liang, G; Yu, D	Key Laboratory of Tropical Plant Resources and Sustainable Use, Xishuangbanna Tropical Botanical Garden, Chinese Academy of SciencesKunming, China.	click here	click here	click here	click here	journal
28712501	10.1016/bs.pmbts.2017.05.002	Gene Editing in Polyploid Crops: Wheat, Camelina, Canola, Potato, Cotton, Peanut, Sugar Cane, and Citrus.	Polyploid crops make up a significant portion of the major food and fiber crops of the world and include wheat, potato, cotton, apple, peanut, citrus, and brassica oilseeds such as rape, canola, and Camelina. The presence of three sets of chromosomes in triploids, four sets in tetraploids, and six sets in hexaploids present significant challenges to conventional plant breeding and, potentially, t…	eng	Progress in molecular biology and translational science	Prog Mol Biol Transl Sci	101498165	2017			149		65-80	Internet	Donald P Weeks	Weeks, DP	University of Nebraska, Lincoln, NE, United States. Electronic address: dweeks1@unl.edu.	click here	click here	click here	click here	journal
28913791	10.1007/978-1-4939-7337-8_1	Enabling Molecular Technologies for Trait Improvement in Wheat.	Wheat is the major staple food crop and a source of calories for humans worldwide. A steady increase in the wheat production is essential to meet the demands of an ever-increasing global population and to achieve food security. The large size and structurally intricate genome of polyploid wheat had hindered the genomic analysis. However, with the advent of new genomic technologies such as next ge…	eng	Methods in molecular biology (Clifton, N.J.)	Methods Mol Biol	9214969	2017			1679		3-24	Internet	Prem L Bhalla	Bhalla, PL; Sharma, A; Singh, MB	Plant Molecular Biology and Biotechnology Laboratory, School of Agriculture and Food, Faculty of Veterinary and Agricultural Sciences, The University of Melbourne, Parkville, VIC, 3010, Australia.	click here	click here	click here	click here	journal
28757883	10.2217/pme-2016-0047	Emerging ethical perspectives in the clustered regularly interspaced short palindromic repeats genome-editing debate.	This paper provides an overview of the ethical issues in the international clustered regularly interspaced short palindromic repeats (CRISPR) genome editing debate from March 2015 to September 2016. We present the regulatory framework for embryo research in the UK, and explain why CRISPR is not a significant break with the past. We discuss the ethical issues arising from CRISPR applications beyon…	eng	Personalized medicine	Per Med	101238549	2016	Nov		13	6	575-586	Print	Silvia Camporesi	Camporesi, S; Cavaliere, G	Director, Bioethics & Society Postgraduate Programme, Department of Global Health & Social Medicine, King's College London, London, UK.	click here	click here	click here	click here	journal
27584931	10.1097/MNH.0000000000000267	Current status of alloimmunity.	The present review aims to highlight the major recent advances in transplantation with regards to basic, translational, and clinical research.We describe new concepts in understanding allorecognition and allospecificity of T cells, and discuss current challenges in targeting memory T cells, including the limitation of rodent disease models. From a clinical perspective, we highlight the advances i…	eng	Current opinion in nephrology and hypertension	Curr Opin Nephrol Hypertens	9303753	2016	Nov		25	6	556-562	Internet	Thiago J Borges	Borges, TJ; Murakami, N; Riella, LV	Renal Division, Transplantation Research Center, Brigham and Women's Hospital, Harvard Medical School, Boston, Massachusetts, USA.	click here	click here	click here	click here	journal
27371731	10.1152/ajplung.00001.2016	Macrophage micro-RNA-155 promotes lipopolysaccharide-induced acute lung injury in mice and rats.	Micro-RNA (miR)-155 is a novel gene regulator with important roles in inflammation. Herein, our study aimed to explore the role of miR-155 in LPS-induced acute lung injury(ALI). ALI in mice was induced by intratracheally delivered LPS. Loss-of-function experiments performed on miR-155 knockout mice showed that miR-155 gene inactivation protected mice from LPS-induced ALI, as manifested by preserv…	eng	American journal of physiology. Lung cellular and molecular physiology	Am J Physiol Lung Cell Mol Physiol	100901229	2016	Aug		311	2	L494-506	Internet	Wen Wang	Wang, W; Liu, Z; Su, J; Chen, WS; Wang, XW; Bai, SX; Zhang, JZ; Yu, SQ	Department of Traditional Chinese Medicine, Xijing Hospital, Fourth Military Medical University, Xi'an, Shaanxi Province, China;	click here	click here	click here	click here	journal
27571968	10.1007/s10529-016-2195-z	CRISPR/Cas9: a promising way to exploit genetic variation in plants.	Creation of variation in existing gene pool of crop plants is the foremost requirement in crop improvement programmes. Genome editing is a tool to produce knock out of target genes either by introduction of insertion or by deletion that disrupts the function of a specific gene. The CRISPR/Cas9 (clustered regularly interspaced short palindromic repeats/CRISPR-associated protein 9) system is the mo…	eng	Biotechnology letters	Biotechnol Lett	8008051	2016	Dec		38	12	1991-2006	Internet	Reema Rani	Rani, R; Yadav, P; Barbadikar, KM; Baliyan, N; Malhotra, EV; Singh, BK; Kumar, A; Singh, D	ICAR-Directorate of Rapeseed-Mustard Research, Bharatpur, Rajasthan, 321303, India. reemasherwal@gmail.com.	click here	click here	click here	click here	journal
28920331		[Prospecting application of CRISPR/Cas9 genome editing technology in research of medicinal plants].	CRISPR/Cas9 genome editing technology is a newly discovered genome editing technology in recent years.It has been widely used in many fields such as gene therapy, gene function research, animal model-making,cropvariety improvement and so on. This article briefly introduces the CRISPR/Cas9 genome editing system, and discusses its potential applications in the research of medicinal plants, includin…	chi	Zhongguo Zhong yao za zhi = Zhongguo zhongyao zazhi = China journal of Chinese materia medica	Zhongguo Zhong Yao Za Zhi	8913656	2016	Aug		41	16	2953-2957	Print	Tian-Yuan Hu	Hu, TY; Gao, W; Huang, LQ	School of Traditional Chinese Medicine, Capital Medical University, Beijing 100069, China.	click here	click here	click here	click here	journal
26896588	10.1016/j.pbi.2016.01.007	Advances and perspectives on the use of CRISPR/Cas9 systems in plant genomics research.	Genome editing with site-specific nucleases has become a powerful tool for functional characterization of plant genes and genetic improvement of agricultural crops. Among the various site-specific nuclease-based technologies available for genome editing, the clustered regularly interspaced short palindromic repeat (CRISPR)/CRISPR-associated protein 9 (Cas9) systems have shown the greatest potenti…	eng	Current opinion in plant biology	Curr Opin Plant Biol	100883395	2016	04		30		70-7	Internet	Degao Liu	Liu, D; Hu, R; Palla, KJ; Tuskan, GA; Yang, X	Biosciences Division, Oak Ridge National Laboratory, Oak Ridge, TN 37831-6422, USA.	click here	click here	click here	click here	journal
27137209	10.1007/s00299-016-1987-x	The expanding footprint of CRISPR/Cas9 in the plant sciences.	CRISPR/Cas9 has evolved and transformed the field of biology at an unprecedented pace. From the initial purpose of introducing a site specific mutation within a genome of choice, this technology has morphed into enabling a wide array of molecular applications, including site-specific transgene insertion and multiplexing for the simultaneous induction of multiple cleavage events. Efficiency, speci…	eng	Plant cell reports	Plant Cell Rep	9880970	2016	Jul		35	7	1451-68	Internet	Scott M Schaeffer	Schaeffer, SM; Nakata, PA	Department of Pediatrics, Baylor College of Medicine, USDA/ARS Children's Nutrition Research Center, 1100 Bates St., Houston, TX, 77030-2600, USA.	click here	click here	click here	click here	journal
27955725	10.1016/j.bbrc.2016.10.130	Current status of potential applications of repurposed Cas9 for structural and functional genomics of plants.	Redesigned Cas9 has emerged as a tool with various applications like gene editing, gene regulation, epigenetic modification and chromosomal imaging. Target specific single guide RNA (sgRNA) can be used with Cas9 for precise gene editing with high efficiency than previously known methods. Further, nuclease-deactivated Cas9 (dCas9) can be fused with activator or repressor for activation (CRISPRa) a…	eng	Biochemical and biophysical research communications	Biochem Biophys Res Commun	0372516	2016	Nov		480	4	499-507	Internet	Kunal Seth	Seth, K; Harish,	Plant Biotechnology Laboratory, Department of Botany, Mohanlal Sukhadia University, Udaipur 313 001, Rajasthan, India.	click here	click here	click here	click here	journal
25641327	10.3109/07388551.2015.1004521	Next biotech plants: new traits, crops, developers and technologies for addressing global challenges.	Most of the genetically modified (GM) plants currently commercialized encompass a handful of crop species (soybean, corn, cotton and canola) with agronomic characters (traits) directed against some biotic stresses (pest resistance, herbicide tolerance or both) and created by multinational companies. The same crops with agronomic traits already on the market today will continue to be commercialize…	eng	Critical reviews in biotechnology	Crit Rev Biotechnol	8505177	2016	Aug		36	4	675-90	Internet	Agnès E Ricroch	Ricroch, AE; Hénard-Damave, MC	a Department of Life Sciences and Health , AgroParisTech , Génétique évolutive et amélioration des plantes , Paris Cedex , France and.	click here	click here	click here	click here	journal
27252719	10.3389/fpls.2016.00703	Recent Advances in Genome Editing Using CRISPR/Cas9.	The CRISPR (clustered regularly interspaced short palindromic repeat)-Cas9 (CRISPR-associated nuclease 9) system is a versatile tool for genome engineering that uses a guide RNA (gRNA) to target Cas9 to a specific sequence. This simple RNA-guided genome-editing technology has become a revolutionary tool in biology and has many innovative applications in different fields. In this review, we briefl…	eng	Frontiers in plant science	Front Plant Sci	101568200	2016			7		703	Print	Yuduan Ding	Ding, Y; Li, H; Chen, LL; Xie, K	National Key Laboratory of Crop Genetic Improvement, Huazhong Agricultural UniversityWuhan, China; College of Informatics, Huazhong Agricultural UniversityWuhan, China.	click here	click here	click here	click here	journal
27917188	10.3389/fpls.2016.01740	CRISPR-Cas9: Tool for Qualitative and Quantitative Plant Genome Editing.	Recent developments in genome editing techniques have aroused substantial excitement among agricultural scientists. These techniques offer new opportunities for developing improved plant lines with addition of important traits or removal of undesirable traits. Increased adoption of genome editing has been geared by swiftly developing Clustered regularly interspaced short palindromic repeats (CRIS…	eng	Frontiers in plant science	Front Plant Sci	101568200	2016			7		1740	Print	Ali Noman	Noman, A; Aqeel, M; He, S	College of Crop Science, Fujian Agriculture and Forestry University Fuzhou, China.	click here	click here	click here	click here	journal
27313592	10.3389/fpls.2016.00765	An Overview of CRISPR-Based Tools and Their Improvements: New Opportunities in Understanding Plant-Pathogen Interactions for Better Crop Protection.	Modern omics platforms have made the determination of susceptible/resistance genes feasible in any species generating huge numbers of potential targets for crop protection. However, the efforts to validate these targets have been hampered by the lack of a fast, precise, and efficient gene targeting system in plants. Now, the repurposing of clustered regularly interspaced short palindromic repeats…	eng	Frontiers in plant science	Front Plant Sci	101568200	2016			7		765	Print	Abdellah Barakate	Barakate, A; Stephens, J	Cell and Molecular Sciences, The James Hutton Institute Dundee, UK.	click here	click here	click here	click here	journal
27148329	10.3389/fpls.2016.00506	The CRISPR/Cas Genome-Editing Tool: Application in Improvement of Crops.	The Clustered Regularly Interspaced Short Palindromic Repeats associated Cas9/sgRNA system is a novel targeted genome-editing technique derived from bacterial immune system. It is an inexpensive, easy, most user friendly and rapidly adopted genome editing tool transforming to revolutionary paradigm. This technique enables precise genomic modifications in many different organisms and tissues. Cas9…	eng	Frontiers in plant science	Front Plant Sci	101568200	2016			7		506	Print	Surender Khatodia	Khatodia, S; Bhatotia, K; Passricha, N; Khurana, SM; Tuteja, N	Amity Institute of Biotechnology, Amity University Haryana Gurgaon, India.	click here	click here	click here	click here	journal
27833616	10.3389/fpls.2016.01521	Coconut Lethal Yellowing Diseases: A Phytoplasma Threat to Palms of Global Economic and Social Significance.	The recent discovery of Bogia coconut syndrome in Papua New Guinea (PNG) is the first report of a lethal yellowing disease (LYD) in Oceania. Numerous outbreaks of LYDs of coconut have been recorded in the Caribbean and Africa since the late Nineteenth century and have caused the death of millions of palms across several continents during the Twentieth century. Despite the severity of economic los…	eng	Frontiers in plant science	Front Plant Sci	101568200	2016			7		1521	Print	Geoff M Gurr	Gurr, GM; Johnson, AC; Ash, GJ; Wilson, BA; Ero, MM; Pilotti, CA; Dewhurst, CF; You, MS	State Key Laboratory of Ecological Pest Control for Fujian and Taiwan Crops, Fujain Agriculture and Forestry UniversityFuzhou, China; Institute of Applied Ecology, College of Plant Protection, Fujian Agriculture and Forestry UniversityFuzhou, China; Graham Centre of Agricultural Innovation, Charles Sturt UniversityOrange, NSW, Australia.	click here	click here	click here	click here	journal
26876195	10.1016/j.tplants.2016.01.014	Lessons from Domestication: Targeting Cis-Regulatory Elements for Crop Improvement.	Domestication of wild plant species has provided us with crops that serve our human nutritional needs. Advanced DNA sequencing has propelled the unveiling of underlying genetic changes associated with domestication. Interestingly, many changes reside in cis-regulatory elements (CREs) that control the expression of an unmodified coding sequence. Sequence variation in CREs can impact gene expressio…	eng	Trends in plant science	Trends Plant Sci	9890299	2016	06		21	6	506-515	Internet	Gwen Swinnen	Swinnen, G; Goossens, A; Pauwels, L	Department of Plant Systems Biology, VIB, Technologiepark 927, B-9052 Gent, Belgium; Department of Plant Biotechnology and Bioinformatics, Ghent University, Technologiepark 927, B-9052 Gent, Belgium.	click here	click here	click here	click here	journal
27103354	10.1111/mpp.12417	Engineering of CRISPR/Cas9-mediated potyvirus resistance in transgene-free Arabidopsis plants.	Members of the eukaryotic translation initiation factor (eIF) gene family, including eIF4E and its paralogue eIF(iso)4E, have previously been identified as recessive resistance alleles against various potyviruses in a range of different hosts. However, the identification and introgression of these alleles into important crop species is often limited. In this study, we utilise CRISPR/Cas9 technolo…	eng	Molecular plant pathology	Mol Plant Pathol	100954969	2016	10		17	8	1276-88	Internet	Douglas E Pyott	Pyott, DE; Sheehan, E; Molnar, A	Institute of Molecular Plant Sciences, University of Edinburgh, Edinburgh, EH9 3JR, UK.	click here	click here	click here	click here	journal
27403935	10.1038/srep29620	Heritable genome editing with CRISPR/Cas9 induces anosmia in a crop pest moth.	Lepidoptera suffer critical lack of genetic tools and heritable genome edition has been achieved only in a few model species. Here we demonstrate that the CRISPR/Cas9 system is highly efficient for genome editing in a non-model crop pest Lepidoptera, the noctuid moth Spodoptera littoralis. We knocked-out the olfactory receptor co-receptor Orco gene to investigate its function in Lepidoptera olfac…	eng	Scientific reports	Sci Rep	101563288	2016	Jul		6		29620	Internet	Fotini A Koutroumpa	Koutroumpa, FA; Monsempes, C; François, MC; de Cian, A; Royer, C; Concordet, JP; Jacquin-Joly, E	INRA, UMR iEES-Paris, route de Saint-Cyr, 78026 Versailles Cedex, France.	click here	click here	click here	click here	journal
27848933	10.1038/ncomms13274	Genome editing in maize directed by CRISPR-Cas9 ribonucleoprotein complexes.	Targeted DNA double-strand breaks have been shown to significantly increase the frequency and precision of genome editing. In the past two decades, several double-strand break technologies have been developed. CRISPR-Cas9 has quickly become the technology of choice for genome editing due to its simplicity, efficiency and versatility. Currently, genome editing in plants primarily relies on deliver…	eng	Nature communications	Nat Commun	101528555	2016	Nov		7		13274	Internet	Sergei Svitashev	Svitashev, S; Schwartz, C; Lenderts, B; Young, JK; Mark Cigan, A	Trait Enabling Technologies, DuPont Pioneer, Johnston, Iowa 50131, USA.	click here	click here	click here	click here	journal
27038939	10.1007/s00299-016-1974-2	Consumer acceptance of food crops developed by genome editing.	One of the major problems regarding consumer acceptance of genetically modified organisms (GMOs) is the possibility that their transgenes could have adverse effects on the environment and/or human health. Genome editing, represented by the CRISPR/Cas9 system, can efficiently achieve transgene-free gene modifications and is anticipated to generate a wide spectrum of plants. However, the public att…	eng	Plant cell reports	Plant Cell Rep	9880970	2016	Jul		35	7	1507-18	Internet	Tetsuya Ishii	Ishii, T; Araki, M	Office of Health and Safety, Hokkaido University, Sapporo, 060-0808, Hokkaido, Japan. tishii@general.hokudai.ac.jp.	click here	click here	click here	click here	journal
26808139	10.1111/mpp.12375	Development of broad virus resistance in non-transgenic cucumber using CRISPR/Cas9 technology.	Genome editing in plants has been boosted tremendously by the development of CRISPR/Cas9 (Clustered Regularly Interspaced Short Palindromic Repeats) technology. This powerful tool allows substantial improvement in plant traits in addition to those provided by classical breeding. Here, we demonstrate the development of virus resistance in cucumber (Cucumis sativus L.) using Cas9/subgenomic RNA (sg…	eng	Molecular plant pathology	Mol Plant Pathol	100954969	2016	09		17	7	1140-53	Internet	Jeyabharathy Chandrasekaran	Chandrasekaran, J; Brumin, M; Wolf, D; Leibman, D; Klap, C; Pearlsman, M; Sherman, A; Arazi, T; Gal-On, A	Department of Plant Pathology and Weed Research, ARO, Volcani Center, Bet-Dagan, 50250, Israel.	click here	click here	click here	click here	journal
27493650	10.3389/fpls.2016.01045	Geminivirus-Mediated Genome Editing in Potato (Solanum tuberosum L.) Using Sequence-Specific Nucleases.	Genome editing using sequence-specific nucleases (SSNs) is rapidly being developed for genetic engineering in crop species. The utilization of zinc finger nucleases (ZFNs), transcription activator-like effector nucleases (TALENs), and clustered regularly interspaced short palindromic repeats/CRISPR-associated systems (CRISPR/Cas) for inducing double-strand breaks facilitates targeting of virtuall…	eng	Frontiers in plant science	Front Plant Sci	101568200	2016			7		1045	Print	Nathaniel M Butler	Butler, NM; Baltes, NJ; Voytas, DF; Douches, DS	Department of Plant, Soils and Microbial Sciences, Michigan State University, East Lansing MI, USA.	click here	click here	click here	click here	journal
26936792	10.1093/pcp/pcw049	Precision Targeted Mutagenesis via Cas9 Paired Nickases in Rice.	Recent reports of CRISPR- (clustered regularly interspaced short palindromic repeats)/Cas9 (CRISPR-associated protein 9) mediated heritable mutagenesis in plants highlight the need for accuracy of the mutagenesis directed by this system. Off-target mutations are an important issue when considering functional gene analysis, as well as the molecular breeding of crop plants with large genome size, i…	eng	Plant & cell physiology	Plant Cell Physiol	9430925	2016	May		57	5	1058-68	Internet	Masafumi Mikami	Mikami, M; Toki, S; Endo, M	Graduate School of Nanobioscience, Yokohama City University, 22-2 Seto, Yokohama, Kanagawa, 236-0027 Japan Plant Genome Engineering Research Unit, Agrogenomics Research Center, National Institute of Agrobiological Sciences, 2-1-2 Kannondai, Tsukuba, Ibaraki, 305-8602 Japan.	click here	click here	click here	click here	journal
27530958	10.1038/srep31481	Efficient Genome Editing in Apple Using a CRISPR/Cas9 system.	Genome editing is a powerful technique for genome modification in molecular research and crop breeding, and has the great advantage of imparting novel desired traits to genetic resources. However, the genome editing of fruit tree plantlets remains to be established. In this study, we describe induction of a targeted gene mutation in the endogenous apple phytoene desaturase (PDS) gene using the CR…	eng	Scientific reports	Sci Rep	101563288	2016	Aug		6		31481	Internet	Chikako Nishitani	Nishitani, C; Hirai, N; Komori, S; Wada, M; Okada, K; Osakabe, K; Yamamoto, T; Osakabe, Y	NARO Institute of Fruit Tree and Tea Science, 2-1 Fujimoto, Tsukuba, Ibaraki 305-8605, Japan.	click here	click here	click here	click here	journal
27499683	10.2174/1389202917666160331202517	Genomics Approaches For Improving Salinity Stress Tolerance in Crop Plants.	Salinity is one of the major factors which reduces crop production worldwide. Plant responses to salinity are highly complex and involve a plethora of genes. Due to its multigenicity, it has been difficult to attain a complete understanding of how plants respond to salinity. Genomics has progressed tremendously over the past decade and has played a crucial role towards providing necessary knowled…	eng	Current genomics	Curr Genomics	100960527	2016	Aug		17	4	343-57	Print	Ramsong Chantre Nongpiur	Nongpiur, RC; Singla-Pareek, SL; Pareek, A	Stress Physiology and Molecular Biology Laboratory, School of Life Sciences, Jawaharlal Nehru University, New Delhi 110067,India;	click here	click here	click here	click here	journal
25416289	10.1093/pcp/pcu170	Genome editing with engineered nucleases in plants.	Numerous examples of successful 'genome editing' now exist. Genome editing uses engineered nucleases as powerful tools to target specific DNA sequences to edit genes precisely in the genomes of both model and crop plants, as well as a variety of other organisms. The DNA-binding domains of zinc finger (ZF) proteins were the first to be used as genome editing tools, in the form of designed ZF nucle…	eng	Plant & cell physiology	Plant Cell Physiol	9430925	2015	Mar		56	3	389-400	Internet	Yuriko Osakabe	Osakabe, Y; Osakabe, K	RIKEN Center for Sustainable Resource Science, 3-1-1 Koyadai, Tsukuba, Ibaraki, 305-0074 Japan.	click here	click here	click here	click here	journal
26635829	10.3389/fpls.2015.01001	Targeting Non-Coding RNAs in Plants with the CRISPR-Cas Technology is a Challenge yet Worth Accepting.	Non-coding RNAs (ncRNAs) have emerged as versatile master regulator of biological functions in recent years. MicroRNAs (miRNAs) are small endogenous ncRNAs of 18-24 nucleotides in length that originates from long self-complementary precursors. Besides their direct involvement in developmental processes, plant miRNAs play key roles in gene regulatory networks and varied biological processes. Alter…	eng	Frontiers in plant science	Front Plant Sci	101568200	2015			6		1001	Print	Jolly Basak	Basak, J; Nithin, C	Department of Biotechnology, Visva-Bharati University Santiniketan, India.	click here	click here	click here	click here	journal
26479970	10.1080/21645698.2015.1106063	CRISPR/Cas mutagenesis of soybean and Medicago truncatula using a new web-tool and a modified Cas9 enzyme.	The CRISPR/Cas9 system is rapidly becoming the reagent of choice for targeted mutagenesis and gene editing in crop species. There are currently intense research efforts in the crop sciences to identify efficient CRISPR/Cas9 platforms to carry out targeted mutagenesis and gene editing projects. These efforts typically result in the incremental tweaking of various platform components including the …	eng	GM crops & food	GM Crops Food	101572655	2015			6	4	243-52	Internet	Jean-Michel Michno	Michno, JM; Wang, X; Liu, J; Curtin, SJ; Kono, TJ; Stupar, RM	a Department of Agronomy and Plant Genetics ; University of Minnesota ; Saint Paul , MN USA.	click here	click here	click here	click here	journal
26408904	10.1016/j.bbrc.2015.09.117	CRISPR/Cas9-mediated mutagenesis of the RIN locus that regulates tomato fruit ripening.	Site-directed mutagenesis using genetic approaches can provide a wealth of resources for crop breeding as well as for biological research. The clustered regularly interspaced short palindromic repeat (CRISPR)/CRISPR-associated 9 endonuclease (CRISPR/Cas9) system is a novel strategy used to induce mutations in a specific genome region; the system functions in a variety of organisms, including plan…	eng	Biochemical and biophysical research communications	Biochem Biophys Res Commun	0372516	2015	Nov		467	1	76-82	Internet	Yasuhiro Ito	Ito, Y; Nishizawa-Yokoi, A; Endo, M; Mikami, M; Toki, S	National Food Research Institute, NARO, 2-1-12 Kannondai, Tsukuba, Ibaraki 305-8642, Japan. Electronic address: yasuito@affrc.go.jp.	click here	click here	click here	click here	journal
26930114	10.1080/21645698.2015.1129937	Genome editing for crop improvement: Challenges and opportunities.	Genome or gene editing includes several new techniques to help scientists precisely modify genome sequences. The techniques also enables us to alter the regulation of gene expression patterns in a pre-determined region and facilitates novel insights into the functional genomics of an organism. Emergence of genome editing has brought considerable excitement especially among agricultural scientists…	eng	GM crops & food	GM Crops Food	101572655	2015			6	4	183-205	Internet	Naglaa A Abdallah	Abdallah, NA; Prakash, CS; McHughen, AG	a Faculty of Agriculture; Cairo University ; Cairo , Egypt ;	click here	click here	click here	click here	journal
26541286	10.1186/s13059-015-0796-9	High-frequency, precise modification of the tomato genome.	The use of homologous recombination to precisely modify plant genomes has been challenging, due to the lack of efficient methods for delivering DNA repair templates to plant cells. Even with the advent of sequence-specific nucleases, which stimulate homologous recombination at predefined genomic sites by creating targeted DNA double-strand breaks, there are only a handful of studies that report p…	eng	Genome biology	Genome Biol	100960660	2015	Nov		16		232	Internet	Tomáš Čermák	Čermák, T; Baltes, NJ; Čegan, R; Zhang, Y; Voytas, DF	Department of Genetics, Cell Biology & Development and Center for Genome Engineering, University of Minnesota, Minneapolis, Minnesota, 55455, USA. tcermak@umn.edu.	click here	click here	click here	click here	journal
26657719	10.1371/journal.pone.0144591	Generation and Inheritance of Targeted Mutations in Potato (Solanum tuberosum L.) Using the CRISPR/Cas System.	Genome editing using sequence-specific nucleases (SSNs) offers an alternative approach to conventional genetic engineering and an opportunity to extend the benefits of genetic engineering in agriculture. Currently available SSN platforms, such as zinc finger nucleases (ZFNs), transcription activator-like effector nucleases (TALENs), and CRISPR/Cas (clustered regularly interspaced short palindromi…	eng	PloS one	PLoS One	101285081	2015			10	12	e0144591	Internet	Nathaniel M Butler	Butler, NM; Atkins, PA; Voytas, DF; Douches, DS	Department of Plant, Soils and Microbial Sciences, Michigan State University, East Lansing, Michigan, 48824, United States of America.	click here	click here	click here	click here	journal
25344637	10.1007/s11103-014-0263-0	CRISPR/Cas9-mediated targeted mutagenesis in Nicotiana tabacum.	Genome editing is one of the most powerful tools for revealing gene function and improving crop plants. Recently, RNA-guided genome editing using the type II clustered regularly interspaced short palindromic repeats (CRISPR)-associated protein (Cas) system has been used as a powerful and efficient tool for genome editing in various organisms. Here, we report genome editing in tobacco (Nicotiana t…	eng	Plant molecular biology	Plant Mol Biol	9106343	2015	Jan		87	1-2	99-110	Internet	Junping Gao	Gao, J; Wang, G; Ma, S; Xie, X; Wu, X; Zhang, X; Wu, Y; Zhao, P; Xia, Q	State Key Laboratory of Silkworm Genome Biology, Southwest University, Chongqing, 400715, China.	click here	click here	click here	click here	journal
24920971	10.1186/s12284-014-0005-6	Gene targeting using the Agrobacterium tumefaciens-mediated CRISPR-Cas system in rice.	The type II clustered, regularly interspaced, short palindromic repeat (CRISPR)/ CRISPR-associated protein 9 (Cas9) system is a novel molecular tool for site-specific genome modification. The CRISPR-Cas9 system was recently introduced into plants by transient or stable transformation.Here, we report gene targeting in rice via the Agrobacterium tumefaciens-mediated CRISPR-Cas9 system. Three 20-nt …	eng	Rice (New York, N.Y.)	Rice (N Y)	101503136	2014			7	1	5	Print	Rongfang Xu	Xu, R; Li, H; Qin, R; Wang, L; Li, L; Wei, P; Yang, J	Key Laboratory of Rice Genetics Breeding of Anhui Province, Rice Research Institute, Anhui Academy of Agricultural Sciences, Hefei 230031, China ; College of Life Sciences, Anhui University, Hefei 230031, China.	click here	click here	click here	click here	journal
24710347	10.1371/journal.pone.0093806	Targeted genome editing of sweet orange using Cas9/sgRNA.	Genetic modification, including plant breeding, has been widely used to improve crop yield and quality, as well as to increase disease resistance. Targeted genome engineering is expected to contribute significantly to future varietal improvement, and genome editing technologies using zinc finger nucleases (ZFNs), transcription activator-like effector nucleases (TALENs), and clustered regularly in…	eng	PloS one	PLoS One	101285081	2014			9	4	e93806	Internet	Hongge Jia	Jia, H; Wang, N	Citrus Research and Education Center, Department of Microbiology and Cell Science, University of Florida, Lake Alfred, Florida, United States of America.	click here	click here	click here	click here	journal
24166445	10.1387/ijdb.130194hp	Gene targeting in plants: 25 years later.	Only five years after the initiation of transgenic research in plants, gene targeting (GT) was achieved for the first time in tobacco. Unfortunately, the frequency of targeted integration via homologous recombination (HR) was so low in comparison to random integration that GT could not be established as a feasible technique in higher plants. It took another 25 years and great effort to develop th…	eng	The International journal of developmental biology	Int J Dev Biol	8917470	2013			57	6-8	629-37	Internet	Holger Puchta	Puchta, H; Fauser, F	Botanical Institute II, Karlsruhe Institute of Technology, Karlsruhe, Germany. holger.puchta@kit.edu.	click here	click here	click here	click here	journal
24112467	10.1186/1746-4811-9-39	Plant genome editing made easy: targeted mutagenesis in model and crop plants using the CRISPR/Cas system.	Targeted genome engineering (also known as genome editing) has emerged as an alternative to classical plant breeding and transgenic (GMO) methods to improve crop plants. Until recently, available tools for introducing site-specific double strand DNA breaks were restricted to zinc finger nucleases (ZFNs) and TAL effector nucleases (TALENs). However, these technologies have not been widely adopted …	eng	Plant methods	Plant Methods	101245798	2013	Oct		9	1	39	Print	Khaoula Belhaj	Belhaj, K; Chaparro-Garcia, A; Kamoun, S; Nekrasov, V	The Sainsbury Laboratory, Norwich Research Park, Norwich, UK.	click here	click here	click here	click here	journal
23956122	10.1093/mp/sst119	RNA-guided genome editing in plants using a CRISPR-Cas system.	Precise and straightforward methods to edit the plant genome are much needed for functional genomics and crop improvement. Recently, RNA-guided genome editing using bacterial Type II cluster regularly interspaced short palindromic repeats (CRISPR)-associated nuclease (Cas) is emerging as an efficient tool for genome editing in microbial and animal systems. Here, we report the genome editing and t…	eng	Molecular plant	Mol Plant	101465514	2013	Nov		6	6	1975-83	Internet	Kabin Xie	Xie, K; Yang, Y	Department of Plant Pathology and Environmental Microbiology, The Huck Institute of the Life Sciences, Pennsylvania State University, University Park, PA 16802, USA.	click here	click here	click here	click here	journal
29437254	10.1002/JLB.3MIA0917-352R	CRISPR/Cas9 knockout of USP18 enhances type I IFN responsiveness and restricts HIV-1 infection in macrophages.	The IFN-stimulated gene ubiquitin-specific proteinase 18 (USP18) encodes a protein that negatively regulates T1 IFN signaling via stearic inhibition of JAK1 recruitment to the IFN-α receptor 2 subunit (IFNAR2). Here, we demonstrate that USP18 expression is induced by HIV-1 in a T1 IFN-dependent manner. Experimental depletion of USP18 by clustered regularly interspaced short palindromic repeats (C…	eng	Journal of leukocyte biology	J Leukoc Biol	8405628	2018	Feb					Internet	Jared P Taylor	Taylor, JP; Cash, MN; Santostefano, KE; Nakanishi, M; Terada, N; Wallet, MA	Department of Pathology, Immunology & Laboratory Medicine, University of Florida, Gainesville, Florida, USA.	click here	click here	click here	click here	journal
29298051	10.1021/acs.bioconjchem.7b00768	CRISPRed Macrophages for Cell-Based Cancer Immunotherapy.	We present here an integrated nanotechnology/biology strategy for cancer immunotherapy that uses arginine nanoparticles (ArgNPs) to deliver CRISPR-Cas9 gene editing machinery into cells to generate SIRP-α knockout macrophages. The NP system efficiently codelivers single guide RNA (sgRNA) and Cas9 protein required for editing to knock out the "don't eat me signal" in macrophages that prevents phag…	eng	Bioconjugate chemistry	Bioconjug Chem	9010319	2018	Feb		29	2	445-450	Internet	Moumita Ray	Ray, M; Lee, YW; Hardie, J; Mout, R; Yeşilbag Tonga, G; Farkas, ME; Rotello, VM	Department of Chemistry, University of Massachusetts , 710 North Pleasant Street, Amherst, Massachusetts 01003, United States.	click here	click here	click here	click here	journal
29453406	10.1038/s41598-018-21575-8	CRISPR-Cas9, a tool to efficiently increase the development of recombinant African swine fever viruses.	African swine fever virus (ASFV) causes a highly contagious disease called African swine fever. This disease is often lethal for domestic pigs, causing extensive losses for the swine industry. ASFV is a large and complex double stranded DNA virus. Currently there is no commercially available treatment or vaccine to prevent this devastating disease. Development of recombinant ASFV for producing li…	eng	Scientific reports	Sci Rep	101563288	2018	Feb		8	1	3154	Internet	Manuel V Borca	Borca, MV; Holinka, LG; Berggren, KA; Gladue, DP	Agricultural Research Service (ARS), Plum Island Animal Disease Center, Greenport, NY, 11944, USA.	click here	click here	click here	click here	journal
29337166	10.1016/j.antiviral.2018.01.004	CD163 knockout pigs are fully resistant to highly pathogenic porcine reproductive and respiratory syndrome virus.	Porcine reproductive and respiratory syndrome virus (PRRSV) causes severe economic losses to current swine production worldwide. Highly pathogenic PRRSV (HP-PRRSV), originated from a genotype 2 PRRSV, is more virulent than classical PRRSV and further exacerbates the economic impact. HP-PRRSV has become the predominant circulating field strain in China since 2006. CD163 is a cellular receptor for …	eng	Antiviral research	Antiviral Res	8109699	2018	Mar		151		63-70	Internet	Huaqiang Yang	Yang, H; Zhang, J; Zhang, X; Shi, J; Pan, Y; Zhou, R; Li, G; Li, Z; Cai, G; Wu, Z	National Engineering Research Center for Breeding Swine Industry, College of Animal Science, South China Agricultural University, Guangzhou, China; Wens Foodstuff Group Co., Ltd., Yunfu, China. Electronic address: yangh@scau.edu.cn.	click here	click here	click here	click here	journal
29344851	10.1007/s10529-018-2506-7	The evolution of CRISPR/Cas9 and their cousins: hope or hype?	Clustered regularly interspaced short palindromic repeats (CRISPR)/Cas9 system allows biologists to edit genomic DNA of any cell in precise and specific way, entailing great potential for crop improvement, drug development and gene therapy. The system involves a nuclease (Cas9) and a designed guide RNA that are involved in wide range of applications such as genome modification, transcriptional mo…	eng	Biotechnology letters	Biotechnol Lett	8008051	2018	Mar		40	3	465-477	Internet	Kulbhushan Chaudhary	Chaudhary, K; Chattopadhyay, A; Pratap, D	Advanced Centre for Plant Virology, Division of Plant Pathology, Indian Agricultural Research Institute, New Delhi, India.	click here	click here	click here	click here	journal
29449584	10.1038/s41419-018-0301-y	CRISPR whole-genome screening identifies new necroptosis regulators and RIPK1 alternative splicing.	The necroptotic cell death pathway is a key component of human pathogen defense that can become aberrantly derepressed during tissue homeostasis to contribute to multiple types of tissue damage and disease. While formation of the necrosome kinase signaling complex containing RIPK1, RIPK3, and MLKL has been extensively characterized, additional mechanisms of its regulation and effector functions l…	eng	Cell death & disease	Cell Death Dis	101524092	2018	Feb		9	3	261	Internet	Marinella G Callow	Callow, MG; Watanabe, C; Wickliffe, KE; Bainer, R; Kummerfield, S; Weng, J; Cuellar, T; Janakiraman, V; Chen, H; Chih, B; Liang, Y; Haley, B; Newton, K; Costa, MR	Department of Discovery Oncology, Genentech, Inc., 1 DNA Way, South San Francisco, CA, 94080, USA.	click here	click here	click here	click here	journal
28640964	10.1111/pbi.12778	Targeted mutagenesis in tetraploid switchgrass (Panicum virgatum L.) using CRISPR/Cas9.	The CRISPR/Cas9 system has become a powerful tool for targeted mutagenesis. Switchgrass (Panicum virgatum L.) is a high yielding perennial grass species that has been designated as a model biomass crop by the U.S. Department of Energy. The self-infertility and high ploidy level make it difficult to study gene function or improve germplasm. To overcome these constraints, we explored the feasibilit…	eng	Plant biotechnology journal	Plant Biotechnol J	101201889	2018	Feb		16	2	381-393	Internet	Yang Liu	Liu, Y; Merrick, P; Zhang, Z; Ji, C; Yang, B; Fei, SZ	Interdepartmental Graduate Major in Plant Biology, Iowa State University, Ames, IA, USA.	click here	click here	click here	click here	journal
29332168	10.1007/s00299-018-2252-2	Efficient CRISPR/Cas9-based genome editing in carrot cells.	The first report presenting successful and efficient carrot genome editing using CRISPR/Cas9 system. Clustered Regularly Interspaced Short Palindromic Repeats (CRISPR)/CRISPR-associated (Cas9) is a powerful genome editing tool that has been widely adopted in model organisms recently, but has not been used in carrot-a model species for in vitro culture studies and an important health-promoting cro…	eng	Plant cell reports	Plant Cell Rep	9880970	2018	Apr		37	4	575-586	Internet	Magdalena Klimek-Chodacka	Klimek-Chodacka, M; Oleszkiewicz, T; Lowder, LG; Qi, Y; Baranski, R	Institute of Plant Biology and Biotechnology, Faculty of Biotechnology and Horticulture, University of Agriculture in Krakow, AL. 29 Listopada 54, 31-425, Krakow, Poland. m.chodacka@ogr.ur.krakow.pl.	click here	click here	click here	click here	journal
29532865	10.3892/ijo.2018.4290	CRISPR/Cas9-mediated ASXL1 mutations in U937 cells disrupt myeloid differentiation.	Additional sex combs-like 1 (ASXL1) is a well‑known tumor suppressor gene and epigenetic modifier. ASXL1 mutations are frequent in myeloid malignances; these mutations are risk factors for the development of myelodysplasia and also appear as small clones during normal aging. ASXL1 appears to act as an epigenetic regulator of cell survival and myeloid differentiation; however, the molecular mechan…	eng	International journal of oncology	Int J Oncol	9306042	2018	Apr		52	4	1209-1223	Internet	Zhi-Jie Wu	Wu, ZJ; Zhao, X; Banaszak, LG; Gutierrez-Rodrigues, F; Keyvanfar, K; Gao, SG; Quinones Raffo, D; Kajigaya, S; Young, NS	Hematology Branch, National Heart, Lung and Blood Institute, National Institutes of Health, Bethesda, MD 20892-1202, USA.	click here	click here	click here	click here	journal
29459263	10.1016/j.atherosclerosis.2018.02.015	Hyperlipidemia induces typical atherosclerosis development in Ldlr and Apoe deficient rats.	Low-density lipoprotein receptor (Ldlr) and apolipoprotein E (Apoe) knockout (KO) mice have been widely used as animal models of atherosclerosis. However, data suggested that it is difficult to develop typical atherosclerosis in rats. To this end, Ldlr and Apoe KO rats were generated and the potential to develop novel atherosclerosis models was evaluated.We established Apoe/Ldlr single and double…	eng	Atherosclerosis	Atherosclerosis	0242543	2018	Apr		271		26-35	Internet	Yongliang Zhao	Zhao, Y; Yang, Y; Xing, R; Cui, X; Xiao, Y; Xie, L; You, P; Wang, T; Zeng, L; Peng, W; Li, D; Chen, H; Liu, M	Shanghai Key Laboratory of Regulatory Biology, Institute of Biomedical Sciences, School of Life Sciences, East China Normal University, Shanghai, China.	click here	click here	click here	click here	journal
29051223	10.1074/jbc.M117.799155	CRISPR/Cas-based screening of long non-coding RNAs (lncRNAs) in macrophages with an NF-κB reporter.	The innate immune system protects against infections by initiating an inducible inflammatory response. NF-κB is one of the critical transcription factors controlling this complex response, but some aspects of its regulation remain unclear. For example, although long non-coding RNAs (lncRNAs) have been shown to critically regulate gene expression, only a fraction of these have been functionally ch…	eng	The Journal of biological chemistry	J Biol Chem	2985121R	2017	Dec		292	51	20911-20920	Internet	Sergio Covarrubias	Covarrubias, S; Robinson, EK; Shapleigh, B; Vollmers, A; Katzman, S; Hanley, N; Fong, N; McManus, MT; Carpenter, S	From the Department of Molecular, Cell, and Developmental Biology and.	click here	click here	click here	click here	journal
28111278	10.1016/j.stemcr.2016.12.020	Human Induced Pluripotent Stem Cell-Derived Macrophages Share Ontogeny with MYB-Independent Tissue-Resident Macrophages.	Tissue-resident macrophages, such as microglia, Kupffer cells, and Langerhans cells, derive from Myb-independent yolk sac (YS) progenitors generated before the emergence of hematopoietic stem cells (HSCs). Myb-independent YS-derived resident macrophages self-renew locally, independently of circulating monocytes and HSCs. In contrast, adult blood monocytes, as well as infiltrating, gut, and dermal…	eng	Stem cell reports	Stem Cell Reports	101611300	2017	02		8	2	334-345	Internet	Julian Buchrieser	Buchrieser, J; James, W; Moore, MD	Sir William Dunn School of Pathology, University of Oxford, South Parks Road, Oxford OX1 3RE, UK. Electronic address: julian.buchrieser@path.ox.ac.uk.	click here	click here	click here	click here	journal
29021376	10.4049/jimmunol.1700184	ARIH2 Ubiquitinates NLRP3 and Negatively Regulates NLRP3 Inflammasome Activation in Macrophages.	The nucleotide-binding oligomerization domain-like receptor family pyrin domain containing 3 (NLRP3) inflammasome is a molecular platform that induces caspase-1 activation and subsequent IL-1β maturation, and is implicated in inflammatory diseases; however, little is known about the negative regulation of NLRP3 inflammasome activation. In this article, we identified an E3 ligase, Ariadne homolog …	eng	Journal of immunology (Baltimore, Md. : 1950)	J Immunol	2985117R	2017	11		199	10	3614-3622	Internet	Akira Kawashima	Kawashima, A; Karasawa, T; Tago, K; Kimura, H; Kamata, R; Usui-Kawanishi, F; Watanabe, S; Ohta, S; Funakoshi-Tago, M; Yanagisawa, K; Kasahara, T; Suzuki, K; Takahashi, M	Division of Inflammation Research, Center for Molecular Medicine, Jichi Medical University, Tochigi 329-0498, Japan; akirak5243@gmail.com masafumi2@jichi.ac.jp.	click here	click here	click here	click here	journal
28231264	10.1371/journal.ppat.1006206	Precision engineering for PRRSV resistance in pigs: Macrophages from genome edited pigs lacking CD163 SRCR5 domain are fully resistant to both PRRSV genotypes while maintaining biological function.	Porcine Reproductive and Respiratory Syndrome (PRRS) is a panzootic infectious disease of pigs, causing major economic losses to the world-wide pig industry. PRRS manifests differently in pigs of all ages but primarily causes late-term abortions and stillbirths in sows and respiratory disease in piglets. The causative agent of the disease is the positive-strand RNA PRRS virus (PRRSV). PRRSV has a…	eng	PLoS pathogens	PLoS Pathog	101238921	2017	Feb		13	2	e1006206	Internet	Christine Burkard	Burkard, C; Lillico, SG; Reid, E; Jackson, B; Mileham, AJ; Ait-Ali, T; Whitelaw, CB; Archibald, AL	The Roslin Institute and Royal (Dick) School of Veterinary Studies, University of Edinburgh, Easter Bush, Midlothian, United Kingdom.	click here	click here	click here	click here	journal
28390179	10.1002/mrd.22811	Gene editing as applied to prevention of reproductive porcine reproductive and respiratory syndrome.	Porcine Reproductive and Respiratory Syndrome (PRRS) causes severe reproductive failure in sows as well as transplacental transfer of PRRS virus (PRRSV) to late-gestation fetuses, resulting in abortions, early farrowing, increased number of stillborn piglets, and weak neonatal piglets. PRRSV-infected boars present with anorexia and lethargy, and have decreased sperm quality. The gene for the cell…	eng	Molecular reproduction and development	Mol Reprod Dev	8903333	2017	Sep		84	9	926-933	Internet	Kristin M Whitworth	Whitworth, KM; Prather, RS	Division of Animal Science, University of Missouri-Columbia, Columbia, Missouri.	click here	click here	click here	click here	journal
29114997	10.1111/febs.14293	In vitro modeling of HIV proviral activity in microglia.	Microglia, the resident macrophages of the brain, play a key role in the pathogenesis of HIV-associated neurocognitive disorders (HAND) due to their productive infection by HIV. This results in the release of neurotoxic viral proteins and pro-inflammatory compounds which negatively affect the functionality of surrounding neurons. Because models of HIV infection within the brain are limited, we ai…	eng	The FEBS journal	FEBS J	101229646	2017	12		284	23	4096-4114	Internet	Lee A Campbell	Campbell, LA; Richie, CT; Zhang, Y; Heathward, EJ; Coke, LM; Park, EY; Harvey, BK	Intramural Research Program, National Institute on Drug Abuse, Biomedical Research Center, Baltimore, MD, USA.	click here	click here	click here	click here	journal
27196580	10.1136/gutjnl-2015-311059	Comparative genomics of Crohn's disease-associated adherent-invasiveEscherichia coli.	Adherent-invasiveEscherichia coli(AIEC) are a leading candidate bacterial trigger for Crohn's disease (CD). The AIEC pathovar is defined by in vitro cell-line assays examining specific bacteria/cell interactions. No molecular marker exists for their identification. Our aim was to identify a molecular property common to the AIEC phenotype.41 B2 phylogroupE. colistrains were isolated from 36 Austra…	eng	Gut	Gut	2985108R	2017	08		66	8	1382-1389	Internet	Claire L O'Brien	O'Brien, CL; Bringer, MA; Holt, KE; Gordon, DM; Dubois, AL; Barnich, N; Darfeuille-Michaud, A; Pavli, P	Medical School, Australian National University, Canberra, Australian Capital Territory, Australia.	click here	click here	click here	click here	journal
28422754	10.1172/jci.insight.89635	MPEG1/perforin-2 mutations in human pulmonary nontuberculous mycobacterial infections.	Perforin-2 is a highly conserved pore-forming protein encoded by macrophage expressed gene 1 (MPEG1). A number of studies have shown that Perforin-2-deficient mice are unable to survive following a bacterial challenge that is nonlethal in WT mice. There is also recent evidence that Mpeg1+/- heterozygous mice display an intermediate killing ability compared with Mpeg1 WT and Mpeg1-/- mice. Despite…	eng	JCI insight	JCI Insight	101676073	2017	Apr		2	8		Internet	Ryan M McCormack	McCormack, RM; Szymanski, EP; Hsu, AP; Perez, E; Olivier, KN; Fisher, E; Goodhew, EB; Podack, ER; Holland, SM		click here	click here	click here	click here	journal
28701426	10.1083/jcb.201703103	Dynamics of in vivo ASC speck formation.	Activated danger or pathogen sensors trigger assembly of the inflammasome adaptor ASC into specks, large signaling platforms considered hallmarks of inflammasome activation. Because a lack of in vivo tools has prevented the study of endogenous ASC dynamics, we generated a live ASC reporter through CRISPR/Cas9 tagging of the endogenous gene in zebrafish. We see strong ASC expression in the skin an…	eng	The Journal of cell biology	J Cell Biol	0375356	2017	09		216	9	2891-2909	Internet	Paola Kuri	Kuri, P; Schieber, NL; Thumberger, T; Wittbrodt, J; Schwab, Y; Leptin, M	Directors' Research Unit, European Molecular Biology Laboratory, Heidelberg, Germany.	click here	click here	click here	click here	journal
28635594	10.7554/eLife.27786	Translation repression via modulation of the cytoplasmic poly(A)-binding protein in the inflammatory response.	Gene expression is precisely regulated during the inflammatory response to control infection and limit the detrimental effects of inflammation. Here, we profiled global mRNA translation dynamics in the mouse primary macrophage-mediated inflammatory response and identified hundreds of differentially translated mRNAs. These mRNAs' 3'UTRs have enriched binding motifs for several RNA-binding proteins…	eng	eLife	Elife	101579614	2017	06		6			Internet	Xu Zhang	Zhang, X; Chen, X; Liu, Q; Zhang, S; Hu, W	Department of Biochemistry and Molecular Biology, Mayo Clinic, Rochester, United States.	click here	click here	click here	click here	journal
28904407	10.1038/s41598-017-11915-5	Syk-dependent tyrosine phosphorylation of 3BP2 is required for optimal FcRγ-mediated phagocytosis and chemokine expression in U937 cells.	The adaptor protein c-Abl SH3 domain binding protein-2 (3BP2) is tyrosine phosphorylated by Syk in response to cross-linking of antigen receptors, which in turn activates various immune responses. Recently, a study using the mouse model of cherubism, a dominant inherited disorder caused by mutations in the gene encoding 3BP2, showed that 3BP2 is involved in the regulation of phagocytosis mediated…	eng	Scientific reports	Sci Rep	101563288	2017	Sep		7	1	11480	Internet	Kazuyasu Chihara	Chihara, K; Kato, Y; Yoshiki, H; Takeuchi, K; Fujieda, S; Sada, K	Department of Genome Science and Microbiology, Faculty of Medical Sciences, University of Fukui, 23-3 Matsuoka-Shimoaizuki, Eiheiji, Fukui, 910-1193, Japan.	click here	click here	click here	click here	journal
28130450	10.1074/jbc.M116.766337	Small GTPase Rab8a-recruited Phosphatidylinositol 3-Kinase γ Regulates Signaling and Cytokine Outputs from Endosomal Toll-like Receptors.	LPS-mediated activation of Toll-like receptor 4 (TLR4) in macrophages results in the coordinated release of proinflammatory cytokines, followed by regulatory mediators, to ensure that this potentially destructive pathway is tightly regulated. We showed previously that Rab8a recruits PI3Kγ for Akt-dependent signaling during TLR4 activation to limit the production of the proinflammatory cytokines I…	eng	The Journal of biological chemistry	J Biol Chem	2985121R	2017	03		292	11	4411-4422	Internet	Adam A Wall	Wall, AA; Luo, L; Hung, Y; Tong, SJ; Condon, ND; Blumenthal, A; Sweet, MJ; Stow, JL	From the Institute for Molecular Bioscience (IMB) and IMB Centre for Inflammation and Disease Research, University of Queensland, Brisbane, Queensland 4072, Australia and.	click here	click here	click here	click here	journal
28868328	10.21769/BioProtoc.2320	Creating a RAW264.7 CRISPR-Cas9 Genome Wide Library.	The bacterial clustered regularly interspaced short palindromic repeats (CRISPR)-Cas9 genome editing tools are used in mammalian cells to knock-out specific genes of interest to elucidate gene function. The CRISPR-Cas9 system requires that the mammalian cell expresses Cas9 endonuclease, guide RNA (gRNA) to lead the endonuclease to the gene of interest, and the PAM sequence that links the Cas9 to …	eng	Bio-protocol	Bio Protoc	101635102	2017	May		7	10		Print	Brooke A Napier	Napier, BA; Monack, DM	Department of Microbiology and Immunology, Stanford School of Medicine, Stanford University, Stanford, CA, USA.	click here	click here	click here	click here	journal
27862876	10.1111/pbi.12662	Tomato facultative parthenocarpy results from SlAGAMOUS-LIKE 6 loss of function.	The extreme sensitivity of the microsporogenesis process to moderately high or low temperatures is a major hindrance for tomato (Solanum lycopersicum) sexual reproduction and hence year-round cropping. Consequently, breeding for parthenocarpy, namely, fertilization-independent fruit set, is considered a valuable goal especially for maintaining sustainable agriculture in the face of global warming…	eng	Plant biotechnology journal	Plant Biotechnol J	101201889	2017	May		15	5	634-647	Internet	Chen Klap	Klap, C; Yeshayahou, E; Bolger, AM; Arazi, T; Gupta, SK; Shabtai, S; Usadel, B; Salts, Y; Barg, R	The Institute of Plant Sciences, The Volcani Center, Agricultural Research Organization, Rishon LeZion, Israel.	click here	click here	click here	click here	journal
29190429	10.1165/rcmb.2017-0324MA	Gene-edited MLE-15 Cells as a Model for the Hermansky Pudlak Syndromes.	Defining the mechanisms of cellular pathogenesis for rare lung diseases such as Hermansky Pudlak syndrome (HPS) is often complicated by loss of the differentiated phenotype of cultured primary alveolar type 2 (AT2) cells, and by a lack of durable cell lines that are faithful to both AT2 cell and rare disease phenotypes. We used CRISPR/Cas9 gene editing to generate a series of HPS-specific mutatio…	eng	American journal of respiratory cell and molecular biology	Am J Respir Cell Mol Biol	8917225	2017	Nov					Internet	Seunghyi Kook	Kook, S; Qi, A; Wang, P; Meng, S; Gulleman, P; Young, LR; Guttentag, SH	Vanderbilt University School of Medicine, 12327, Pediatrics, Division of Neonatology, Nashville, Tennessee, United States ; seunghyi.kook@vanderbilt.edu.	click here	click here	click here	click here	journal
29238045	10.1038/s41419-017-0110-8	RIPK3 promotes adenovirus type 5 activity.	Oncolytic adenoviral mutants infect human malignant cells and replicate selectively within them. This induces direct cytotoxicity that can also trigger profound innate and adaptive immune responses. However, the mechanism by which adenoviruses produce cell death remains uncertain. We previously suggested that type 5 adenoviruses, including the E1A CR2 deletion mutant dl922-947, might induce a nov…	eng	Cell death & disease	Cell Death Dis	101524092	2017	Dec		8	12	3206	Internet	Melanie Weigert	Weigert, M; Binks, A; Dowson, S; Leung, EYL; Athineos, D; Yu, X; Mullin, M; Walton, JB; Orange, C; Ennis, D; Blyth, K; Tait, SWG; McNeish, IA	Institute of Cancer Sciences, University of Glasgow, Garscube Estate, Glasgow, G61 1QH, UK.	click here	click here	click here	click here	journal
28806883	10.1089/hum.2017.149	Genome and Epigenome Editing to Treat Disorders of the Hematopoietic System.	The possibility of editing complex genomes in a targeted fashion has revolutionized basic research as well as biomedical and biotechnological applications in the last 5 years. The targeted introduction of genetic changes has allowed researchers to create smart model systems for basic research, bio-engineers to modify crops and farm animals, and translational scientists to develop novel treatment …	eng	Human gene therapy	Hum Gene Ther	9008950	2017	Nov		28	11	1105-1115	Internet	Claudio Mussolino	Mussolino, C; Alzubi, J; Pennucci, V; Turchiano, G; Cathomen, T	1 Institute for Transfusion Medicine and Gene Therapy, Medical Center - University of Freiburg , Germany .	click here	click here	click here	click here	journal
29094203	10.1007/s00439-017-1851-2	Creation of miniature pig model of human Waardenburg syndrome type 2A by ENU mutagenesis.	Human Waardenburg syndrome 2A (WS2A) is a dominant hearing loss (HL) syndrome caused by mutations in the microphthalmia-associated transcription factor (MITF) gene. In mouse models with MITF mutations, WS2A is transmitted in a recessive pattern, which limits the study of hearing loss (HL) pathology. In the current study, we performed ENU (ethylnitrosourea) mutagenesis that resulted in substitutin…	eng	Human genetics	Hum Genet	7613873	2017	11		136	11-12	1463-1475	Internet	Tang Hai	Hai, T; Guo, W; Yao, J; Cao, C; Luo, A; Qi, M; Wang, X; Wang, X; Huang, J; Zhang, Y; Zhang, H; Wang, D; Shang, H; Hong, Q; Zhang, R; Jia, Q; Zheng, Q; Qin, G; Li, Y; Zhang, T; Jin, W; Chen, ZY; Wang, H; Zhou, Q; Meng, A; Wei, H; Yang, S; Zhao, J	State Key Laboratory of Stem Cell and Reproductive Biology, Institute of Zoology, Chinese Academy of Sciences, Beijing, 100101, China.	click here	click here	click here	click here	journal
27648614	10.1016/j.ajpath.2016.06.024	Necrotic Bone Stimulates Proinflammatory Responses in Macrophages through the Activation of Toll-Like Receptor 4.	In Legg-Calvé-Perthes disease, loss of blood supply results in ischemic osteonecrosis of the femoral head (ONFH). Generally, macrophages play important roles in inflammatory responses to tissue necrosis, but their role in ONFH is not known. The purpose of this study was to determine the macrophage-inflammatory responses after ONFH and the receptor mechanisms involved in sensing the necrotic bone,…	eng	The American journal of pathology	Am J Pathol	0370502	2016	Nov		186	11	2987-2999	Internet	Naga Suresh Adapala	Adapala, NS; Yamaguchi, R; Phipps, M; Aruwajoye, O; Kim, HKW	Center for Excellence in Hip Disorders, Texas Scottish Rite Hospital for Children, Dallas, Texas; Department of Orthopedic Surgery, University of Texas Southwestern Medical Center, Dallas, Texas.	click here	click here	click here	click here	journal
28194150	10.3389/fimmu.2016.00696	Epigenetic Regulation of Interleukin 6 by Histone Acetylation in Macrophages and Its Role in Paraquat-Induced Pulmonary Fibrosis.	Overexpression of interleukin 6 (IL-6) has been proposed to contribute to pulmonary fibrosis and other fibrotic diseases. However, the regulatory mechanisms and the role ofIL-6in fibrosis remain poorly understood. Epigenetics refers to alterations of gene expression without changes in the DNA sequence. Alternation of chromatin accessibility by histone acetylation acts as a critical epigenetic mec…	eng	Frontiers in immunology	Front Immunol	101560960	2016			7		696	Print	Lingli Hu	Hu, L; Yu, Y; Huang, H; Fan, H; Hu, L; Yin, C; Li, K; Fulton, DJ; Chen, F	Department of Forensic Medicine, Nanjing Medical University , Nanjing , China.	click here	click here	click here	click here	journal
26848986	10.1159/000442944	The Tyrosine Kinase Pyk2 Contributes to Complement-Mediated Phagocytosis in Murine Macrophages.	Proline-rich tyrosine kinase 2 (Pyk2) is a member of the focal adhesion kinase (FAK) family and is mainly expressed in neuronal and hematopoietic cells. As FAK family members are involved in signaling connections downstream of integrins, we studied the role of Pyk2 in complement-receptor 3 (CR3, also known as Mac-1, integrin αMβ2, CD11b/CD18)-mediated phagocytosis, a key process in innate immunit…	eng	Journal of innate immunity	J Innate Immun	101469471	2016			8	5	437-51	Internet	Christoph Paone	Paone, C; Rodrigues, N; Ittner, E; Santos, C; Buntru, A; Hauck, CR	Lehrstuhl für Zellbiologie, Universität Konstanz, Konstanz, Germany.	click here	click here	click here	click here	journal
28002843	10.1167/iovs.16-19593	Loss of Zebrafish Mfrp Causes Nanophthalmia, Hyperopia, and Accumulation of Subretinal Macrophages.	Mutations in membrane frizzled-related protein (MFRP) are associated with nanophthalmia, hyperopia, foveoschisis, irregular patches of RPE atrophy, and optic disc drusen in humans. Mouse mfrp mutants show retinal degeneration but no change in eye size or refractive state. The goal of this work was to generate zebrafish mutants to investigate the loss of Mfrp on eye size and refractive state, and …	eng	Investigative ophthalmology & visual science	Invest Ophthalmol Vis Sci	7703701	2016	12		57	15	6805-6814	Internet	Ross F Collery	Collery, RF; Volberding, PJ; Bostrom, JR; Link, BA; Besharse, JC	Department of Cell Biology, Neurobiology, and Anatomy, Medical College of Wisconsin, Milwaukee, Wisconsin, United States.	click here	click here	click here	click here	journal
27071500	10.1002/cpt.379	Evolving paradigms in clinical pharmacology and therapeutics for the treatment of Duchenne muscular dystrophy.	Progressive muscle weakness and degeneration due to the lack of dystrophin eventually leads to the loss of independent ambulation by the middle of the patient's second decade, and a fatal outcome due to cardiac or respiratory failure by the third decade. More specifically, loss of sarcolemmal dystrophin and the dystrophin-associated glycoprotein (DAG) complex promotes muscle fiber damage during m…	eng	Clinical pharmacology and therapeutics	Clin Pharmacol Ther	0372741	2016	Aug		100	2	142-6	Internet	J Huard	Huard, J; Mu, X; Lu, A	Department of Orthopedic Surgery, McGovern Medical School, University of Texas Health Science Center at Houston, Houston, Texas, USA.	click here	click here	click here	click here	journal
28053997	10.1038/mtm.2016.80	"Marker of Self" CD47 on lentiviral vectors decreases macrophage-mediated clearance and increases delivery to SIRPA-expressing lung carcinoma tumors.	Lentiviruses infect many cell types and are now widely used for gene deliveryin vitro, butin vivouptake of these foreign vectors by macrophages is a limitation. Lentivectors are produced here from packaging cells that overexpress "Marker of Self" CD47, which inhibits macrophage uptake of cells when prophagocytic factors are also displayed. Single particle analyses show "hCD47-Lenti" display prope…	eng	Molecular therapy. Methods & clinical development	Mol Ther Methods Clin Dev	101624857	2016			3		16080	Print	Nisha G Sosale	Sosale, NG; Ivanovska, II; Tsai, RK; Swift, J; Hsu, JW; Alvey, CM; Zoltick, PW; Discher, DE	Biophysical Engineering Labs, University of Pennsylvania , Philadelphia, Pennsylvania, USA.	click here	click here	click here	click here	journal
26553871	10.1074/jbc.C115.700492	A Genome-wide CRISPR (Clustered Regularly Interspaced Short Palindromic Repeats) Screen Identifies NEK7 as an Essential Component of NLRP3 Inflammasome Activation.	Inflammasomes are high molecular weight protein complexes that assemble in the cytosol upon pathogen encounter. This results in caspase-1-dependent pro-inflammatory cytokine maturation, as well as a special type of cell death, known as pyroptosis. The Nlrp3 inflammasome plays a pivotal role in pathogen defense, but at the same time, its activity has also been implicated in many common sterile inf…	eng	The Journal of biological chemistry	J Biol Chem	2985121R	2016	Jan		291	1	103-9	Internet	Jonathan L Schmid-Burgk	Schmid-Burgk, JL; Chauhan, D; Schmidt, T; Ebert, TS; Reinhardt, J; Endl, E; Hornung, V	From the Institute of Molecular Medicine and.	click here	click here	click here	click here	journal
27697835	10.1084/jem.20160027	Complement pathway amplifies caspase-11-dependent cell death and endotoxin-induced sepsis severity.	Cell death and release of proinflammatory mediators contribute to mortality during sepsis. Specifically, caspase-11-dependent cell death contributes to pathology and decreases in survival time in sepsis models. Priming of the host cell, through TLR4 and interferon receptors, induces caspase-11 expression, and cytosolic LPS directly stimulates caspase-11 activation, promoting the release of proinf…	eng	The Journal of experimental medicine	J Exp Med	2985109R	2016	Oct		213	11	2365-2382	Internet	Brooke A Napier	Napier, BA; Brubaker, SW; Sweeney, TE; Monette, P; Rothmeier, GH; Gertsvolf, NA; Puschnik, A; Carette, JE; Khatri, P; Monack, DM	Department of Microbiology and Immunology, Stanford University, Stanford, CA 94305.	click here	click here	click here	click here	journal
27667451		[Brd3 promotes IL-6 production via enhancing acetylase CBP recruitment and histone 3 acetylation within IL6 promoter].	Objective To investigate the role of bromodomain containing 3 (Brd3) in LPS-triggered interleukin-6 (IL-6) production in macrophages and the underlying mechanism. Methods CRISPR-Cas9 technology was used to screen an RAW264.7 cell line with Brd3 knockout (Brd3-/-). The Brd3-/-cells were used as an experimental group, and the parential cells expressing wide-type Brd3 as a control group. The IL-6 le…	chi	Xi bao yu fen zi mian yi xue za zhi = Chinese journal of cellular and molecular immunology	Xi Bao Yu Fen Zi Mian Yi Xue Za Zhi	101139110	2016	Oct		32	10	1301-1305	Print	Wenhui Ren	Ren, W; Sun, D; Wang, C; Li, N	Department of Immunology, College of Basic Medicine, Second Military Medical University, Shanghai 200433, China.	click here	click here	click here	click here	journal
27498117	10.1016/j.freeradbiomed.2016.08.003	Inhibition of histone deacetylase reduces transcription of NADPH oxidases and ROS production and ameliorates pulmonary arterial hypertension.	Excessive levels of reactive oxygen species (ROS) and increased expression of NADPH oxidases (Nox) have been proposed to contribute to pulmonary artery hypertension (PAH) and other cardiovascular diseases (CVD). Nox enzymes are major sources of ROS but the mechanisms regulating changes in Nox expression in disease states remain poorly understood. Epigenetics encompasses a number of mechanisms tha…	eng	Free radical biology & medicine	Free Radic Biol Med	8709159	2016	10		99		167-178	Internet	Feng Chen	Chen, F; Li, X; Aquadro, E; Haigh, S; Zhou, J; Stepp, DW; Weintraub, NL; Barman, SA; Fulton, DJR	Department of Forensic Medicine, Nanjing Medical University, Nanjing, Jiangsu 210029 China; Vascular Biology Center, Augusta University, Augusta, GA 30912, USA. Electronic address: fchen@augusta.edu.	click here	click here	click here	click here	journal
26251102	10.1111/pbi.12444	The Regulatory Status of Genome-edited Crops.	Genome editing with engineered nucleases (GEEN) represents a highly specific and efficient tool for crop improvement with the potential to rapidly generate useful novel phenotypes/traits. Genome editing techniques initiate specifically targeted double strand breaks facilitating DNA-repair pathways that lead to base additions or deletions by non-homologous end joining as well as targeted gene repl…	eng	Plant biotechnology journal	Plant Biotechnol J	101201889	2016	Feb		14	2	510-8	Internet	Jeffrey D Wolt	Wolt, JD; Wang, K; Yang, B	Department of Agronomy, Iowa State University, Ames, IA, USA.	click here	click here	click here	click here	journal
27606440	10.1038/nbt.3659	Applications of CRISPR technologies in research and beyond.	Programmable DNA cleavage using CRISPR-Cas9 enables efficient, site-specific genome engineering in single cells and whole organisms. In the research arena, versatile CRISPR-enabled genome editing has been used in various ways, such as controlling transcription, modifying epigenomes, conducting genome-wide screens and imaging chromosomes. CRISPR systems are already being used to alleviate genetic …	eng	Nature biotechnology	Nat Biotechnol	9604648	2016	Sep		34	9	933-941	Internet	Rodolphe Barrangou	Barrangou, R; Doudna, JA	Department of Food, Bioprocessing and Nutrition Sciences, North Carolina State University, Raleigh, North Carolina, USA.	click here	click here	click here	click here	journal
27874087	10.1038/srep37395	Development of Commercial Thermo-sensitive Genic Male Sterile Rice Accelerates Hybrid Rice Breeding Using the CRISPR/Cas9-mediated TMS5 Editing System.	Hybrid rice breeding offers an important strategy to improve rice production, in which the cultivation of a male sterile line is the key to the success of cross-breeding. CRISPR/Cas9 systems have been widely used in target-site genome editing, whereas their application for crop genetic improvement has been rarely reported. Here, using the CRISPR/Cas9 system, we induced specific mutations in TMS5,…	eng	Scientific reports	Sci Rep	101563288	2016	Nov		6		37395	Internet	Hai Zhou	Zhou, H; He, M; Li, J; Chen, L; Huang, Z; Zheng, S; Zhu, L; Ni, E; Jiang, D; Zhao, B; Zhuang, C	State Key Laboratory for Conservation and Utilization of Subtropical Agro-bioresources, Guangzhou 510642, China.	click here	click here	click here	click here	journal
26912477	10.1038/srep22024	CRISPR/Cas9-mediated GJA8 knockout in rabbits recapitulates human congenital cataracts.	Cataracts are the leading cause of vision loss in the world, although surgical treatment can restore vision in cataract patients. Until now, there have been no adequate animal models for in vivo studies of artificial lens safety and drug interactions. Genetic studies have demonstrated that GJA8 is involved in maintaining lens opacity and proper lens development. In this study, a cataract model wi…	eng	Scientific reports	Sci Rep	101563288	2016	Feb		6		22024	Internet	Lin Yuan	Yuan, L; Sui, T; Chen, M; Deng, J; Huang, Y; Zeng, J; Lv, Q; Song, Y; Li, Z; Lai, L	Jilin Provincial Key Laboratory of Animal Embryo Engineering, College of Animal Sciences, Jilin University, Changchun, 130062, China.	click here	click here	click here	click here	journal
26863590	10.3791/53297	High Throughput Danio Rerio Energy Expenditure Assay.	Zebrafish are an important model organism with inherent advantages that have the potential to make zebrafish a widely applied model for the study of energy homeostasis and obesity. The small size of zebrafish allows for assays on embryos to be conducted in a 96- or 384-well plate format, Morpholino and CRISPR based technologies promote ease of genetic manipulation, and drug treatment by bath appl…	eng	Journal of visualized experiments : JoVE	J Vis Exp	101313252	2016	Jan			107	e53297	Internet	Savannah Y Williams	Williams, SY; Renquist, BJ	Department of Molecular Physiology and Biophysics, Vanderbilt University Medical Center.	click here	click here	click here	click here	journal
27193190	10.1186/s40478-016-0324-5	The ALS/FTLD associated protein C9orf72 associates with SMCR8 and WDR41 to regulate the autophagy-lysosome pathway.	Hexanucleotide repeat expansion in the C9orf72 gene is a leading cause of frontotemporal lobar degeneration (FTLD) with amyotrophic lateral sclerosis (ALS). Reduced expression of C9orf72 has been proposed as a possible disease mechanism. However, the cellular function of C9orf72 remains to be characterized. Here we report the identification of two binding partners of C9orf72: SMCR8 and WDR41. We …	eng	Acta neuropathologica communications	Acta Neuropathol Commun	101610673	2016	05		4	1	51	Internet	Peter M Sullivan	Sullivan, PM; Zhou, X; Robins, AM; Paushter, DH; Kim, D; Smolka, MB; Hu, F	Department of Molecular Biology and Genetics, Weill Institute for Cell and Molecular Biology, Cornell University, 345 Weill Hall, Ithaca, NY, 14853, USA.	click here	click here	click here	click here	journal
26670276	10.1038/mtna.2015.42	CCR5 Disruption in Induced Pluripotent Stem Cells Using CRISPR/Cas9 Provides Selective Resistance of Immune Cells to CCR5-tropic HIV-1 Virus.	The chemokine (C-C motif) receptor 5 (CCR5) serves as an HIV-1 co-receptor and is essential for cell infection with CCR5-tropic viruses. Loss of functional receptor protects against HIV infection. Here, we report the successful targeting of CCR5 in GFP-marked human induced pluripotent stem cells (iPSCs) using CRISPR/Cas9 with single and dual guide RNAs (gRNAs). Following CRISPER/Cas9-mediated gen…	eng	Molecular therapy. Nucleic acids	Mol Ther Nucleic Acids	101581621	2015	Dec		4		e268	Print	HyunJun Kang	Kang, H; Minder, P; Park, MA; Mesquitta, WT; Torbett, BE; Slukvin, II	National Primate Research Center, University of Wisconsin Graduate School, Madison, Wisconsin, USA.	click here	click here	click here	click here	journal
26125937	10.1371/journal.pone.0130902	Identification of Candidate Adherent-Invasive E. coli Signature Transcripts by Genomic/Transcriptomic Analysis.	Adherent-invasive Escherichia coli (AIEC) strains are detected more frequently within mucosal lesions of patients with Crohn's disease (CD). The AIEC phenotype consists of adherence and invasion of intestinal epithelial cells and survival within macrophages of these bacteria in vitro. Our aim was to identify candidate transcripts that distinguish AIEC from non-invasive E. coli (NIEC) strains and …	eng	PloS one	PLoS One	101285081	2015			10	6	e0130902	Internet	Yuanhao Zhang	Zhang, Y; Rowehl, L; Krumsiek, JM; Orner, EP; Shaikh, N; Tarr, PI; Sodergren, E; Weinstock, GM; Boedeker, EC; Xiong, X; Parkinson, J; Frank, DN; Li, E; Gathungu, G	Department of Applied Mathematics and Statistics, Stony Brook University, Stony Brook, New York, United States of America.	click here	click here	click here	click here	journal
25990091	10.1111/1348-0421.12266	Viral protein R of HIV type-1 induces retrotransposition and upregulates glutamate synthesis by the signal transducer and activator of transcription 1 signaling pathway.	Viral protein R (Vpr) of HIV-1 plays an important role in viral replication in macrophages. Various lines of evidence suggest that expression of Vpr in macrophages causes immunopathogenesis; however, the underlying mechanism is not yet fully understood. In this study, it was shown that recombinant Vpr (rVpr) induces retrotransposition of long interspersed element-1 in RAW264.7, a macrophage-like …	eng	Microbiology and immunology	Microbiol Immunol	7703966	2015	Jul		59	7	398-409	Internet	Akihiro Doi	Doi, A; Iijima, K; Kano, S; Ishizaka, Y	Department of Intractable Diseases, Research Institute, National Center for Global Health and Medicine, 1-21-1 Toyama, Shinjuku-ku, Tokyo, 162-0052.	click here	click here	click here	click here	journal
26444151	10.1111/1750-3841.13094	CRISPR-Based Technologies and the Future of Food Science.	The on-going CRISPR craze is focused on the use of Cas9-based technologies for genome editing applications in eukaryotes, with high potential for translational medicine and next-generation gene therapy. Nevertheless, CRISPR-Cas systems actually provide adaptive immunity in bacteria, and have much promise for various applications in food bacteria that include high-resolution typing of pathogens, v…	eng	Journal of food science	J Food Sci	0014052	2015	Nov		80	11	R2367-72	Internet	Kurt Selle	Selle, K; Barrangou, R	Dept. of Food, Bioprocessing and Nutrition Sciences, Functional Genomics Graduate Program, North Carolina State Univ, Raleigh, NC, 27695, U.S.A.	click here	click here	click here	click here	journal
26022141	10.1038/srep10342	Targeted mutagenesis in soybean using the CRISPR-Cas9 system.	Genome editing is a valuable technique for gene function analysis and crop improvement. Over the past two years, the CRISPR-Cas9 system has emerged as a powerful tool for precisely targeted gene editing. In this study, we predicted 11 U6 genes in soybean (Glycine max L.). We then constructed two vectors (pCas9-GmU6-sgRNA and pCas9-AtU6-sgRNA) using the soybean U6-10 and Arabidopsis U6-26 promoter…	eng	Scientific reports	Sci Rep	101563288	2015	May		5		10342	Internet	Xianjun Sun	Sun, X; Hu, Z; Chen, R; Jiang, Q; Song, G; Zhang, H; Xi, Y	1] College of Agronomy, Northwest A&F University, Yangling, Shaanxi 712100, China [2] National Key Facilities for Crop Genetic Resources and Improvement, Institute of Crop Sciences, Chinese Academy of Agricultural Sciences, Beijing 100081, China.	click here	click here	click here	click here	journal
26745836	10.1080/21645698.2015.1137690	A quick guide to CRISPR sgRNA design tools.	Targeted genome editing is now possible in nearly any organism and is widely acknowledged as a biotech game-changer. Among available gene editing techniques, the CRISPR-Cas9 system is the current favorite because it has been shown to work in many species, does not necessarily result in the addition of foreign DNA at the target site, and follows a set of simple design rules for target selection. U…	eng	GM crops & food	GM Crops Food	101572655	2015			6	4	266-76	Internet	Vincent A Brazelton	Brazelton, VA; Zarecor, S; Wright, DA; Wang, Y; Liu, J; Chen, K; Yang, B; Lawrence-Dill, CJ	a Interdepartmental Genetics and Genomics Program; Iowa State University ; Ames , IA USA.	click here	click here	click here	click here	journal
25880915	10.1186/s12864-015-1476-6	Extensive intra-phylotype diversity in lactobacilli and bifidobacteria from the honeybee gut.	In the honeybee Apis mellifera, the bacterial gut community is consistently colonized by eight distinct phylotypes of bacteria. Managed bee colonies are of considerable economic interest and it is therefore important to elucidate the diversity and role of this microbiota in the honeybee. In this study, we have sequenced the genomes of eleven strains of lactobacilli and bifidobacteria isolated fro…	eng	BMC genomics	BMC Genomics	100965258	2015	Apr		16		284	Internet	Kirsten M Ellegaard	Ellegaard, KM; Tamarit, D; Javelind, E; Olofsson, TC; Andersson, SG; Vásquez, A	Department of Molecular Evolution, Cell and Molecular Biology, Science for Life Laboratory, Biomedical Centre, Uppsala University, Husargatan 3, SE-751 24, Uppsala, Sweden. kirsten-maren.ellegaard@icm.uu.se.	click here	click here	click here	click here	journal
24927590	10.1073/pnas.1407473111	Seamless modification of wild-type induced pluripotent stem cells to the natural CCR5Δ32 mutation confers resistance to HIV infection.	Individuals homozygous for the C-C chemokine receptor type 5 gene with 32-bp deletions (CCR5Δ32) are resistant to HIV-1 infection. In this study, we generated induced pluripotent stem cells (iPSCs) homozygous for the naturally occurring CCR5Δ32 mutation through genome editing of wild-type iPSCs using a combination of transcription activator-like effector nucleases (TALENs) or RNA-guided clustered…	eng	Proceedings of the National Academy of Sciences of the United States of America	Proc Natl Acad Sci U S A	7505876	2014	Jul		111	26	9591-6	Internet	Lin Ye	Ye, L; Wang, J; Beyer, AI; Teque, F; Cradick, TJ; Qi, Z; Chang, JC; Bao, G; Muench, MO; Yu, J; Levy, JA; Kan, YW	Department of Medicine and Institute for Human Genetics, lin.ye@ucsf.edu yw.kan@ucsf.edu.	click here	click here	click here	click here	journal
21833335	10.3389/fmicb.2011.00098	Small Regulatory RNA and Legionella pneumophila.	Legionella pneumophila is a gram-negative bacterial species that is ubiquitous in almost any aqueous environment. It is the agent of Legionnaires' disease, an acute and often under-reported form of pneumonia. In mammals, L. pneumophila replicates inside macrophages within a modified vacuole. Many protein regulators have been identified that control virulence-related properties, including RpoS, Le…	eng	Frontiers in microbiology	Front Microbiol	101548977	2011			2		98	Internet	Sébastien P Faucher	Faucher, SP; Shuman, HA	Complex Traits Group, Department of Microbiology, McGill University Montreal, QC, Canada.	click here	click here	click here	click here	journal
29458716	10.1016/j.funbio.2017.11.006	Selection is required for efficient Cas9-mediated genome editing in Fusarium graminearum.	Genome engineering using Clustered Regularly Interspaced Short Palindromic Repeats (CRISPR)-associated nucleases, such as Cas9 (CRISPR-associated protein 9), are revolutionising molecular biology. In this study, we established a Cas9-based genome editing system in Fusarium graminearum, a highly destructive fungal pathogen of cereal crops. Although the molecular toolkit of F. graminearum is well d…	eng	Fungal biology	Fungal Biol	101524465			2018 Feb - Mar	122	2-3	131-137	Internet	Donald M Gardiner	Gardiner, DM; Kazan, K	CSIRO Agriculture and Food, Queensland Bioscience Precinct, St. Lucia, Qld, 4067, Australia. Electronic address: Donald.Gardiner@csiro.au.	click here	click here	click here	click here	journal
28867501	10.1016/j.ymeth.2017.08.017	Stem cell transplantation for Huntington's diseases.	Therapeutic approaches based on stem cells have received considerable attention as potential treatments for Huntington's disease (HD), which is a fatal, inherited neurodegenerative disorder, caused by progressive loss of GABAergic medium spiny neurons (MSNs) in the striatum of the forebrain. Transplantation of stem cells or their derivatives in animal models of HD, efficiently improved functions …	eng	Methods (San Diego, Calif.)	Methods	9426302	2018	Jan		133		104-112	Internet	Kyung-Ah Choi	Choi, KA; Choi, Y; Hong, S	School of Biosystem and Biomedical Science, College of Health Science, Korea University, 22 Gil 6-3 Inchon-Ro, Seongbuk-Gu, Seoul 02855, Republic of Korea.	click here	click here	click here	click here	journal
29300388	10.1038/nprot.2017.136	Colonoscopy-based colorectal cancer modeling in mice with CRISPR-Cas9 genome editing and organoid transplantation.	Most genetically engineered mouse models (GEMMs) of colorectal cancer are limited by tumor formation in the small intestine, a high tumor burden that limits metastasis, and the need to generate and cross mutant mice. Cell line or organoid transplantation models generally produce tumors in ectopic locations-such as the subcutaneous space, kidney capsule, or cecal wall-that do not reflect the nativ…	eng	Nature protocols	Nat Protoc	101284307	2018	Feb		13	2	217-234	Internet	Jatin Roper	Roper, J; Tammela, T; Akkad, A; Almeqdadi, M; Santos, SB; Jacks, T; Yilmaz, ÖH	The David H. Koch Institute for Integrative Cancer Research at MIT, Cambridge, Massachusetts, USA.	click here	click here	click here	click here	journal
29458735	10.1016/j.hoc.2017.11.007	Gene Therapy and Genome Editing.	The β-thalassemias are inherited blood disorders that result from insufficient production of the β-chain of hemoglobin. More than 200 different mutations have been identified. β-Thalassemia major requires life-long transfusions. The only cure for severe β-thalassemia is to provide patients with hematopoietic stem cells. Globin gene therapy promises a curative autologous stem cell transplantation …	eng	Hematology/oncology clinics of North America	Hematol Oncol Clin North Am	8709473	2018	Apr		32	2	329-342	Internet	Farid Boulad	Boulad, F; Mansilla-Soto, J; Cabriolu, A; Rivière, I; Sadelain, M	Center for Cell Engineering, Memorial Sloan Kettering Cancer Center, 1275 York Avenue, New York, NY 10065, USA; Department of Pediatrics, Memorial Sloan Kettering Cancer Center, 1275 York Avenue, New York, NY 10065, USA. Electronic address: bouladf@mskcc.org.	click here	click here	click here	click here	journal
29497452	10.7573/dic.212522	The latest evidence for possible HIV-1 curative strategies.	Human immunodeficiency virus type 1 (HIV-1) infection remains a major health issue worldwide. In developed countries, antiretroviral therapy has extended its reach from treatment of people living with HIV-1 to post-exposure prophylaxis, treatment as prevention, and, more recently, pre-exposure prophylaxis. These healthcare strategies offer the epidemiological tools to curve the epidemic in rich s…	eng	Drugs in context	Drugs Context	101262187	2018			7		212522	Print	Hanh Thi Pham	Pham, HT; Mesplède, T	McGill University AIDS Centre, Lady Davis Institute for Medical Research, Jewish General Hospital, Montréal, Québec, Canada.	click here	click here	click here	click here	journal
29317080	10.1016/j.mehy.2017.11.009	Effective regeneration of dystrophic muscle using autologous iPSC-derived progenitors with CRISPR-Cas9 mediated precise correction.	Duchenne muscular dystrophy (DMD) is a lethal muscle wasting disease caused by a lack of dystrophin, which eventually leads to apoptosis of muscle cells and impaired muscle contractility. Clustered Regularly Interspaced Short Palindromic Repeats/CRISPR associated protein 9 (CRISPR/Cas9) gene editing of induced pluripotent stem cells (IPSC) offers the potential to correct the DMD gene defect and c…	eng	Medical hypotheses	Med Hypotheses	7505668	2018	Jan		110		97-100	Internet	Mackenzie Hagan	Hagan, M; Ashraf, M; Kim, IM; Weintraub, NL; Tang, Y	Medical College of Georgia, Augusta University, Augusta, GA, USA.	click here	click here	click here	click here	journal
29370156	10.1038/nprot.2017.143	CRISPR/Cas9 genome editing in human hematopoietic stem cells.	Genome editing via homologous recombination (HR) (gene targeting) in human hematopoietic stem cells (HSCs) has the power to reveal gene-function relationships and potentially transform curative hematological gene and cell therapies. However, there are no comprehensive and reproducible protocols for targeting HSCs for HR. Herein, we provide a detailed protocol for the production, enrichment, and i…	eng	Nature protocols	Nat Protoc	101284307	2018	Feb		13	2	358-376	Internet	Rasmus O Bak	Bak, RO; Dever, DP; Porteus, MH	Department of Pediatrics, Stanford University, Stanford, California, USA.	click here	click here	click here	click here	journal
28819278	10.1038/leu.2017.261	Interleukin 4 induces apoptosis of acute myeloid leukemia cells in a Stat6-dependent manner.	Cytokines provide signals that regulate immature normal and acute myeloid leukemia (AML) cells in the bone marrow microenvironment. We here identify interleukin 4 (IL4) as a selective inhibitor of AML cell growth and survival in a cytokine screen using fluorescently labeled AML cells. RNA-sequencing of the AML cells revealed an IL4-induced upregulation of Stat6 target genes and enrichment of apop…	eng	Leukemia	Leukemia	8704895	2018	Mar		32	3	588-596	Internet	P Peña-Martínez	Peña-Martínez, P; Eriksson, M; Ramakrishnan, R; Chapellier, M; Högberg, C; Orsmark-Pietras, C; Richter, J; Andersson, A; Fioretos, T; Järås, M	Department of Clinical Genetics, Lund University, Lund, Sweden.	click here	click here	click here	click here	journal
29554148	10.1371/journal.pone.0194443	Cytotoxic Escherichia coli strains encoding colibactin isolated from immunocompromised mice with urosepsis and meningitis.	Immune-compromised mouse models allow for testing the preclinical efficacy of human cell transplantations and gene therapy strategies before moving forward to clinical trials. However, CRISPR/Cas9 gene editing of the Wsh/Wsh mouse strain to create an immune-compromised model lacking function of Rag2 and Il2rγ led to unexpected morbidity and mortality. This warranted an investigation to ascertain …	eng	PloS one	PLoS One	101285081	2018			13	3	e0194443	Internet	Vasudevan Bakthavatchalu	Bakthavatchalu, V; Wert, KJ; Feng, Y; Mannion, A; Ge, Z; Garcia, A; Scott, KE; Caron, TJ; Madden, CM; Jacobsen, JT; Victora, G; Jaenisch, R; Fox, JG	Division of Comparative Medicine, Massachusetts Institute of Technology, Cambridge, Massachusetts, United States of America.	click here	click here	click here	click here	journal
29449939	10.1186/s40104-018-0231-7	Innovative approaches to genome editing in avian species.	The tools available for genome engineering have significantly improved over the last 5 years, allowing scientist to make precise edits to the genome. Along with the development of these new genome editing tools has come advancements in technologies used to deliver them. In mammals genome engineering tools are typically delivered into in vitro fertilized single cell embryos which are subsequently …	eng	Journal of animal science and biotechnology	J Anim Sci Biotechnol	101581293	2018			9		15	Print	Caitlin A Cooper	Cooper, CA; Doran, TJ; Challagulla, A; Tizard, MLV; Jenkins, KA	CSIRO Health and Biosecurity, Australian Animal Health Laboratory, Private Bag 24, Geelong, VIC 3220 Australia.	click here	click here	click here	click here	journal
29379011	10.1038/s41467-017-02706-7	Streamlined ex vivo and in vivo genome editing in mouse embryos using recombinant adeno-associated viruses.	Recent advances using CRISPR-Cas9 approaches have dramatically enhanced the ease for genetic manipulation in rodents. Notwithstanding, the methods to deliver nucleic acids into pre-implantation embryos have hardly changed since the original description of mouse transgenesis more than 30 years ago. Here we report a novel strategy to generate genetically modified mice by transduction of CRISPR-Cas9…	eng	Nature communications	Nat Commun	101528555	2018	01		9	1	412	Internet	Yeonsoo Yoon	Yoon, Y; Wang, D; Tai, PWL; Riley, J; Gao, G; Rivera-Pérez, JA	Department of Pediatrics, Division of Genes and Development, University of Massachusetts Medical School, 55 Lake Avenue North, Worcester, MA, 01655, USA.	click here	click here	click here	click here	journal
29465426	10.1097/MNH.0000000000000408	Advances in molecular diagnosis and therapeutics in nephrotic syndrome and focal and segmental glomerulosclerosis.	The widespread adoption of next-generation sequencing by research and clinical laboratories has begun to uncover the previously unknown genetic basis of many diseases. In nephrology, one of the best examples of this is seen in focal and segmental glomerulosclerosis (FSGS) and nephrotic syndrome. We review advances made in 2017 as a result of human and molecular genetic studies as it relates to FS…	eng	Current opinion in nephrology and hypertension	Curr Opin Nephrol Hypertens	9303753	2018	Feb					Internet	Bedra Sharif	Sharif, B; Barua, M	Toronto General Research Institute, Toronto General Hospital.	click here	click here	click here	click here	journal
29545372	10.1161/CIRCULATIONAHA.118.033939	TBX20 Regulates Angiogenesis Through the PROK2-PROKR1 Pathway.	Background -Angiogenesis is integral for embryogenesis, and targeting angiogenesis improves the outcome of many pathological conditions in patients. TBX20 is a crucial transcription factor for embryonic development, and its deficiency is associated with congenital heart disease. However, the role of TBX20 in angiogenesis has not been described. Methods -Loss- and gain-of-function approaches were …	eng	Circulation	Circulation	0147763	2018	Mar					Internet	Shu Meng	Meng, S; Gu, Q; Yang, X; Lv, J; Owusu, I; Matrone, G; Chen, K; Cooke, JP; Fang, L	Center for Cardiovascular Regeneration, Department of Cardiovascular Sciences, Houston Methodist Research Institute, Houston, TX.	click here	click here	click here	click here	journal
28778606	10.1016/j.tibtech.2017.07.007	Advances in Industrial Biotechnology Using CRISPR-Cas Systems.	The term 'clustered regularly interspaced short palindromic repeats' (CRISPR) has recently become synonymous with the genome-editing revolution. The RNA-guided endonuclease CRISPR-associated protein 9 (Cas9), in particular, has attracted attention for its promise in basic research and gene editing-based therapeutics. CRISPR-Cas systems are efficient and easily programmable nucleic acid-targeting …	eng	Trends in biotechnology	Trends Biotechnol	8310903	2018	Feb		36	2	134-146	Internet	Paul D Donohoue	Donohoue, PD; Barrangou, R; May, AP	Caribou Biosciences, Inc., 2929 7th St., Suite 105, Berkeley, CA 94710, USA.	click here	click here	click here	click here	journal
29087016	10.1111/pbi.12856	Recent insights into cotton functional genomics: progress and future perspectives.	Functional genomics has transformed from futuristic concept to well-established scientific discipline during the last decade. Cotton functional genomics promise to enhance the understanding of fundamental plant biology to systematically exploit genetic resources for the improvement of cotton fibre quality and yield, as well as utilization of genetic information for germplasm improvement. However,…	eng	Plant biotechnology journal	Plant Biotechnol J	101201889	2018	Mar		16	3	699-713	Internet	Javaria Ashraf	Ashraf, J; Zuo, D; Wang, Q; Malik, W; Zhang, Y; Abid, MA; Cheng, H; Yang, Q; Song, G	State Key Laboratory of Cotton Biology, Institute of Cotton Research, Chinese Academy of Agricultural Sciences, Anyang, Henan, China.	click here	click here	click here	click here	journal
29402392	10.1016/j.ydbio.2018.01.015	Phenotypic novelty by CRISPR in plants.	Genome editing by CRISPR is now routinely used in plant biology for unravelling gene functions and improving agronomical traits. CRISPR opens up the possibility of genome manipulations which would have been unthinkable a few years ago. In this perspective, we discuss and suggest CRISPR-mediated approaches for steering plant development, also highlighting potential challenges.	eng	Developmental biology	Dev Biol	0372762	2018	Mar		435	2	170-175	Internet	Chen Liu	Liu, C; Moschou, PN	Department of Plant Biology, Uppsala BioCenter, Swedish University of Agricultural Sciences and Linnean Center for Plant Biology, Uppsala, Sweden.	click here	click here	click here	click here	journal
29569825	10.1111/pbi.12920	High efficiency genome editing using a dmc1 promoter-controlled CRISPR/Cas9 system in maize.	Previous studies revealed that the promoters for driving both Cas9 and sgRNAs are quite important for efficient genome editing by CRISPR/Cas9 in plants. Here we report our results of targeted genome editing using the maize dmc1 gene promoter combined with the U3 promoter for Cas9 and sgRNA, respectively. Three loci in the maize genome were selected for targeting. The T0 plants regenerated were hi…	eng	Plant biotechnology journal	Plant Biotechnol J	101201889	2018	Mar					Internet	Chao Feng	Feng, C; Su, H; Han, B; Wang, R; Liu, Y; Guo, X; Liu, C; Zhang, J; Yuan, J; Birchler, JA; Han, F	State Kay Laboratory of Plant Cell and Chromosome Engineering, Institute of Genetics and Developmental Biology, Chinese Academy of Sciences, Beijing, 100101, China.	click here	click here	click here	click here	journal
29411094	10.1007/s00299-018-2265-x	OsPKS2 is required for rice male fertility by participating in pollen wall formation.	OsPKS2, the rice orthologous gene of Arabidopsis PKSB/LAP5, encodes a polyketide synthase that is involved in pollen wall formation in rice. In flowering plants, the pollen wall protects male gametes from various environmental stresses and pathogen attacks, as well as promotes pollen germination. The biosynthesis of sporopollenin in tapetal cell is critical for pollen wall formation. Recently, pr…	eng	Plant cell reports	Plant Cell Rep	9880970	2018	Feb					Internet	Ting Zou	Zou, T; Liu, M; Xiao, Q; Wang, T; Chen, D; Luo, T; Yuan, G; Li, Q; Zhu, J; Liang, Y; Deng, Q; Wang, S; Zheng, A; Wang, L; Li, P; Li, S	State Key Laboratory of Hybrid Rice, Sichuan Agricultural University, Chengdu, 611130, China.	click here	click here	click here	click here	journal
29479779	10.1111/pbi.12907	Blocking Amino acid transporter OsAAP3 improves grain yield by promoting outgrowth buds and increasing tiller number in rice.	Amino acid transporters (AATs) play indispensable roles in nutrient allocation during plant development. In this study, we demonstrated that inhibiting expression of the rice amino acid transporter OsAAP3 increased grain yield due to a formation of larger numbers of tillers as a result of increased bud outgrowth. Elevated expression of OsAAP3 in transgenic plants resulted in significantly higher …	eng	Plant biotechnology journal	Plant Biotechnol J	101201889	2018	Feb					Internet	Kai Lu	Lu, K; Wu, B; Wang, J; Zhu, W; Nie, H; Qian, J; Huang, W; Fang, Z	Center of Applied Biotechnology, Wuhan Institute of Bioengineering, Wuhan 430415, PR China.	click here	click here	click here	click here	journal
29363139	10.1111/nph.15002	Genetic analysis of the liverwort Marchantia polymorpha reveals that R2R3MYB activation of flavonoid production in response to abiotic stress is an ancient character in land plants.	The flavonoid pathway is hypothesized to have evolved during land colonization by plants c. 450 Myr ago for protection against abiotic stresses. In angiosperms, R2R3MYB transcription factors are key for environmental regulation of flavonoid production. However, angiosperm R2R3MYB gene families are larger than those of basal plants, and it is not known whether the regulatory system is conserved ac…	eng	The New phytologist	New Phytol	9882884	2018	Apr		218	2	554-566	Internet	Nick W Albert	Albert, NW; Thrimawithana, AH; McGhie, TK; Clayton, WA; Deroles, SC; Schwinn, KE; Bowman, JL; Jordan, BR; Davies, KM	The New Zealand Institute for Plant & Food Research Limited, Private Bag 11600, Palmerston North, New Zealand.	click here	click here	click here	click here	journal
29467380	10.1038/s41429-018-0035-1	Planctopirus hydrillae sp. nov., an antibiotic producing Planctomycete isolated from the aquatic plant Hydrilla and its whole genome shotgun sequence analysis.	An antibiotic producing novel Planctomycete strain, designated JC280T, was isolated from the surface of the plant Hydrilla verticillata collected from an alkaline lake (Buffalo lake), University of Hyderabad, Hyderabad, India. The morphological and chemotaxonomic properties of strain JC280Twere in agreement with the characteristics of the genus Planctopirus. The cell shape was spherical to ovoid …	eng	The Journal of antibiotics	J Antibiot (Tokyo)	0151115	2018	Feb					Internet	Subhash Yadav	Yadav, S; Vaddavalli, R; Siripuram, S; Eedara, RVV; Yadav, S; Rabishankar, O; Lodha, T; Chintalapati, S; Chintalapati, V	Department of Plant Sciences, School of Life Sciences, University of Hyderabad, P.O. Central University, Hyderabad, 500046, India.	click here	click here	click here	click here	journal
29337372	10.1002/cpmb.53	CRISPR-Cas9-Edited Site Sequencing (CRES-Seq): An Efficient and High-Throughput Method for the Selection of CRISPR-Cas9-Edited Clones.	The emergence of clustered regularly interspaced short palindromic repeats-Cas9 (CRISPR-Cas9) gene editing systems has enabled the creation of specific mutants at low cost, in a short time and with high efficiency, in eukaryotic cells. Since a CRISPR-Cas9 system typically creates an array of mutations in targeted sites, a successful gene editing project requires careful selection of edited clones…	eng	Current protocols in molecular biology	Curr Protoc Mol Biol	8908160	2018	Jan		121		31.14.1-31.14.11	Internet	Yaligara Veeranagouda	Veeranagouda, Y; Debono-Lagneaux, D; Fournet, H; Thill, G; Didier, M	Molecular Biology and Genomics, Translational Sciences, Sanofi R&D, Chilly-Mazarin, France.	click here	click here	click here	click here	journal
29197638	10.1016/j.molp.2017.11.010	Robust Transcriptional Activation in Plants Using Multiplexed CRISPR-Act2.0 and mTALE-Act Systems.	User-friendly tools for robust transcriptional activation of endogenous genes are highly demanded in plants. We previously showed that a dCas9-VP64 system consisting of the deactivated CRISPR-associated protein 9 (dCas9) fused with four tandem repeats of the transcriptional activator VP16 (VP64) could be used for transcriptional activation of endogenous genes in plants. In this study, we develope…	eng	Molecular plant	Mol Plant	101465514	2018	Feb		11	2	245-256	Internet	Levi G Lowder	Lowder, LG; Zhou, J; Zhang, Y; Malzahn, A; Zhong, Z; Hsieh, TF; Voytas, DF; Zhang, Y; Qi, Y	Department of Biology, East Carolina University, Greenville, NC 27858, USA.	click here	click here	click here	click here	journal
29421512	10.1016/j.phytochem.2018.01.015	CRISPR/Cas9-mediated efficient targeted mutagenesis of RAS in Salvia miltiorrhiza.	The CRISPR (Clustered Regularly Interspaced Short Palindromic Repeats)/Cas9 (CRISPR-associated) system is a powerful genome editing tool that has been used in many species. In this study, we focused on the phenolic acid metabolic pathway in the traditional Chinese medicinal herb Salvia miltiorrhiza, using the CRISPR/Cas9 system to edit the rosmarinic acid synthase gene (SmRAS) in the water-solubl…	eng	Phytochemistry	Phytochemistry	0151434	2018	Apr		148		63-70	Internet	Zheng Zhou	Zhou, Z; Tan, H; Li, Q; Chen, J; Gao, S; Wang, Y; Chen, W; Zhang, L	Department of Pharmaceutical Botany, School of Pharmacy, Second Military Medical University, Shanghai 200433, China.	click here	click here	click here	click here	journal
28499063	10.1111/pbi.12755	High efficient multisites genome editing in allotetraploid cotton (Gossypium hirsutum) using CRISPR/Cas9 system.	Gossypium hirsutum is an allotetraploid with a complex genome. Most genes have multiple copies that belong to At and Dt subgenomes. Sequence similarity is also very high between gene homologues. To efficiently achieve site/gene-specific mutation is quite needed. Due to its high efficiency and robustness, the CRISPR (clustered regularly interspaced short palindromic repeats)/Cas9 system has exerte…	eng	Plant biotechnology journal	Plant Biotechnol J	101201889	2018	Jan		16	1	137-150	Internet	Pengcheng Wang	Wang, P; Zhang, J; Sun, L; Ma, Y; Xu, J; Liang, S; Deng, J; Tan, J; Zhang, Q; Tu, L; Daniell, H; Jin, S; Zhang, X	National Key Laboratory of Crop Genetic Improvement, Huazhong Agricultural University, Wuhan, Hubei, China.	click here	click here	click here	click here	journal
29331085	10.1111/pbi.12886	Verification of DNA motifs in Arabidopsis using CRISPR/Cas9-mediated mutagenesis.	Transcription factors (TFs) and chromatin-modifying factors (CMFs) access chromatin by recognizing specific DNA motifs in their target genes. Chromatin immunoprecipitation followed by next-generation sequencing (ChIP-seq) has been widely used to discover the potential DNA-binding motifs for both TFs and CMFs. Yet, an in vivo method for verifying DNA motifs captured by ChIP-seq is lacking in plant…	eng	Plant biotechnology journal	Plant Biotechnol J	101201889	2018	Jan					Internet	Chenlong Li	Li, C; Chen, C; Chen, H; Wang, S; Chen, X; Cui, Y	State Key Laboratory of Biocontrol and Guangdong Key Laboratory of Plant Resources, School of Life Sciences, Sun Yat-sen University, Guangzhou, China.	click here	click here	click here	click here	journal
29511025	10.1534/g3.117.300396	High-Resolution Analysis of the Efficiency, Heritability, and Editing Outcomes of CRISPR/Cas9-Induced Modifications ofNCED4in Lettuce (Lactuca sativa).	CRISPR/Cas9 is a transformative tool for making targeted genetic alterations. In plants, high mutation efficiencies have been reported in primary transformants. However, many of the mutations analyzed were somatic and therefore not heritable. To provide more insights into the efficiency of creating stable homozygous mutants using CRISPR/Cas9, we targetedLsNCED4(9-cis-epoxycarotenoid dioxygenase4)…	eng	G3 (Bethesda, Md.)	G3 (Bethesda)	101566598	2018	Mar					Internet	Lien D Bertier	Bertier, LD; Ron, M; Huo, H; Bradford, KJ; Michelmore, RW	University of California - Davis.	click here	click here	click here	click here	journal
29247330	10.1007/s11248-017-0051-0	Alteration of flower colour in Ipomoea nil through CRISPR/Cas9-mediated mutagenesis of carotenoid cleavage dioxygenase 4.	Japanese morning glory, Ipomoea nil, exhibits a variety of flower colours, except yellow, reflecting the accumulation of only trace amounts of carotenoids in the petals. In a previous study, we attributed this effect to the low expression levels of carotenogenic genes in the petals, but there may be other contributing factors. In the present study, we investigated the possible involvement of caro…	eng	Transgenic research	Transgenic Res	9209120	2018	Feb		27	1	25-38	Internet	Kenta Watanabe	Watanabe, K; Oda-Yamamizo, C; Sage-Ono, K; Ohmiya, A; Ono, M	Graduate School of Life and Environmental Sciences, University of Tsukuba, Tsukuba, Ibaraki, 305-8572, Japan.	click here	click here	click here	click here	journal
29068239	10.1094/MPMI-06-17-0131-FI	A Phytophthora palmivora Extracellular Cystatin-Like Protease Inhibitor Targets Papain to Contribute to Virulence on Papaya.	Papaya fruits, stems, and leaves are rich in papain, a cysteine protease that has been shown to mediate plant defense against pathogens and insects. Yet the oomycete Phytophthora palmivora is a destructive pathogen that infects all parts of papaya plants, suggesting that it has evolved cysteine protease inhibitors to inhibit papain to enable successful infection. Out of five putative extracellula…	eng	Molecular plant-microbe interactions : MPMI	Mol Plant Microbe Interact	9107902	2018	Mar		31	3	363-373	Print	Rebecca Gumtow	Gumtow, R; Wu, D; Uchida, J; Tian, M	Department of Plant and Environmental Protection Sciences, University of Hawaii at Manoa, Honolulu, 96822, U.S.A.	click here	click here	click here	click here	journal
29444862	10.1073/pnas.1716945115	Targeted DNA demethylation of theArabidopsisgenome using the human TET1 catalytic domain.	DNA methylation is an important epigenetic modification involved in gene regulation and transposable element silencing. Changes in DNA methylation can be heritable and, thus, can lead to the formation of stable epialleles. A well-characterized example of a stable epiallele in plants isfwa, which consists of the loss of DNA cytosine methylation (5mC) in the promoter of theFLOWERING WAGENINGEN(FWA)…	eng	Proceedings of the National Academy of Sciences of the United States of America	Proc Natl Acad Sci U S A	7505876	2018	Feb		115	9	E2125-E2134	Internet	Javier Gallego-Bartolomé	Gallego-Bartolomé, J; Gardiner, J; Liu, W; Papikian, A; Ghoshal, B; Kuo, HY; Zhao, JM; Segal, DJ; Jacobsen, SE	Department of Molecular, Cell, and Developmental Biology, University of California, Los Angeles, CA 90095.	click here	click here	click here	click here	journal
29371424	10.1126/science.aar4120	Systematic discovery of antiphage defense systems in the microbial pangenome.	The arms race between bacteria and phages led to the development of sophisticated antiphage defense systems, including CRISPR-Cas and restriction-modification systems. Evidence suggests that known and unknown defense systems are located in "defense islands" in microbial genomes. Here, we comprehensively characterized the bacterial defensive arsenal by examining gene families that are clustered ne…	eng	Science (New York, N.Y.)	Science	0404511	2018	03		359	6379		Internet	Shany Doron	Doron, S; Melamed, S; Ofir, G; Leavitt, A; Lopatina, A; Keren, M; Amitai, G; Sorek, R	Department of Molecular Genetics, Weizmann Institute of Science, Rehovot 76100, Israel.	click here	click here	click here	click here	journal
29452418	10.1093/jmcb/mjy007	PHF20 collaborates with PARP1 to promote stemness and aggressiveness of neuroblastoma cells through activation of SOX2 and OCT4.	The differentiation status of neuroblastoma (NB) strongly correlates with its clinical outcomes; however, the molecular mechanisms driving maintenance of stemness and differentiation remain poorly understood. Here, we show that plant homeodomain finger-containing protein 20 (PHF20) functions as a critical epigenetic regulator in sustaining stem cell-like phenotype of NB by using CRISPR/Cas9-based…	eng	Journal of molecular cell biology	J Mol Cell Biol	101503669	2018	Feb					Internet	Wenyong Long	Long, W; Zhao, W; Ning, B; Huang, J; Chu, J; Li, L; Ma, Q; Xing, C; Wang, HY; Liu, Q; Wang, RF	Department of Neurosurgery in Xiangya Hospital, Central South University, Changsha 410008, China.	click here	click here	click here	click here	journal
29356153	10.1111/tpj.13823	MUN (MERISTEM UNSTRUCTURED), encoding a SPC24 homolog of NDC80 kinetochore complex, affects development through cell division in Arabidopsis thaliana.	Kinetochore, a protein super-complex on the centromere of chromosomes, mediates chromosome segregation during cell division by providing attachment sites for spindle microtubules. The NDC80 complex, composed of four proteins, NDC80, NUF2, SPC24 and SPC25, is localized at the outer kinetochore and connects spindle fibers to the kinetochore. Although it is conserved across species, functional studi…	eng	The Plant journal : for cell and molecular biology	Plant J	9207397	2018	Mar		93	6	977-991	Internet	Jinwoo Shin	Shin, J; Jeong, G; Park, JY; Kim, H; Lee, I	Laboratory of Plant Developmental Genetics, School of Biological Sciences, Plant Genomics and Breeding Institute, Seoul National University, Seoul, 08826, Korea.	click here	click here	click here	click here	journal
29451876	10.1371/journal.pone.0192452	Comparative genomic analysis of the multispecies probiotic-marketed product VSL#3.	Several probiotic-marketed formulations available for the consumers contain live lactic acid bacteria and/or bifidobacteria. The multispecies product commercialized as VSL#3 has been used for treating various gastro-intestinal disorders. However, like many other products, the bacterial strains present in VSL#3 have only been characterized to a limited extent and their efficacy as well as their pr…	eng	PloS one	PLoS One	101285081	2018			13	2	e0192452	Internet	François P Douillard	Douillard, FP; Mora, D; Eijlander, RT; Wels, M; de Vos, WM	Research Program Unit Immunobiology, Medicum, University of Helsinki, Helsinki, Finland.	click here	click here	click here	click here	journal
28901971	10.1097/MOT.0000000000000463	Xenotransplantation: past, present, and future.	To review the progress in the field of xenotransplantation with special attention to most recent encouraging findings which will eventually bring xenotransplantation to the clinic in the near future.Starting from early 2000, with the introduction of galactose-α1,3-galactose (Gal)-knockout pigs, prolonged survival especially in heart and kidney xenotransplantation was recorded. However, remaining …	eng	Current opinion in organ transplantation	Curr Opin Organ Transplant	9717388	2017	Dec		22	6	513-521	Internet	Burcin Ekser	Ekser, B; Li, P; Cooper, DKC	aDivision of Transplant Surgery, Department of Surgery, Indiana University School of Medicine, Indianapolis, Indiana bXenotransplantation Program, Department of Surgery, The University of Alabama at Birmingham, Birmingham, Alabama, USA.	click here	click here	click here	click here	journal
28459449	10.1038/nbt.3836	In vivo genome editing and organoid transplantation models of colorectal cancer and metastasis.	In vivo interrogation of the function of genes implicated in tumorigenesis is limited by the need to generate and cross germline mutant mice. Here we describe approaches to model colorectal cancer (CRC) and metastasis, which rely on in situ gene editing and orthotopic organoid transplantation in mice without cancer-predisposing mutations. Autochthonous tumor formation is induced by CRISPR-Cas9-ba…	eng	Nature biotechnology	Nat Biotechnol	9604648	2017	06		35	6	569-576	Internet	Jatin Roper	Roper, J; Tammela, T; Cetinbas, NM; Akkad, A; Roghanian, A; Rickelt, S; Almeqdadi, M; Wu, K; Oberli, MA; Sánchez-Rivera, FJ; Park, YK; Liang, X; Eng, G; Taylor, MS; Azimi, R; Kedrin, D; Neupane, R; Beyaz, S; Sicinska, ET; Suarez, Y; Yoo, J; Chen, L; Zukerberg, L; Katajisto, P; Deshpande, V; Bass, AJ; Tsichlis, PN; Lees, J; Langer, R; Hynes, RO; Chen, J; Bhutkar, A; Jacks, T; Yilmaz, ÖH	The David H. Koch Institute for Integrative Cancer Research at MIT, Cambridge, Massachusetts, USA.	click here	click here	click here	click here	journal
28279194	10.1186/s13287-017-0511-8	CRISPR-targeted genome editing of mesenchymal stem cell-derived therapies for type 1 diabetes: a path to clinical success?	Due to their ease of isolation, differentiation capabilities, and immunomodulatory properties, the therapeutic potential of mesenchymal stem cells (MSCs) has been assessed in numerous pre-clinical and clinical settings. Currently, whole pancreas or islet transplantation is the only cure for people with type 1 diabetes (T1D) and, due to the autoimmune nature of the disease, MSCs have been utilised…	eng	Stem cell research & therapy	Stem Cell Res Ther	101527581	2017	03		8	1	62	Internet	Dario Gerace	Gerace, D; Martiniello-Wilks, R; Nassif, NT; Lal, S; Steptoe, R; Simpson, AM	The School of Life Sciences, Chronic Disease Solutions Team and the Centre for Health Technologies, University of Technology Sydney, PO Box 123, Broadway, NSW, 2007, Australia.	click here	click here	click here	click here	journal
28815481	10.1007/s12015-017-9760-2	Gene Delivery Approaches for Mesenchymal Stem Cell Therapy: Strategies to Increase Efficiency and Specificity.	A significant number of clinical trials have been undertaken to explore the use of mesenchymal stem cells (MSCs) for the treatment of several diseases such as Crohn's disease, diabetes, bone defects, myocardial infarction, stroke etc., Due to their efficiency in homing to the tissue injury sites, their differentiation potential, the capability to secrete a large amount of trophic factors and thei…	eng	Stem cell reviews	Stem Cell Rev	101255952	2017	Dec		13	6	725-740	Internet	Gopi Suresh Oggu	Oggu, GS; Sasikumar, S; Reddy, N; Ella, KKR; Rao, CM; Bokara, KK	CSIR-Center for Cellular and Molecular Biology, Medical Biotechnology Complex, Uppal Road, Hyderabad, Telangana, 500007, India.	click here	click here	click here	click here	journal
28695744	10.1080/14712598.2017.1347629	Genome editing: the breakthrough technology for inherited retinal disease?	Genetic alterations resulting in a dysfunctional retinal pigment epithelium and/or degenerating photoreceptors cause impaired vision. These juxtaposed cells in the retina of the posterior eye are crucial for the visual cycle or phototransduction. Deficits in these biochemical processes perturb neural processing of images capturing the external environment. Notably, there is a distinct lack of cli…	eng	Expert opinion on biological therapy	Expert Opin Biol Ther	101125414	2017	10		17	10	1245-1254	Internet	Andrew J Smith	Smith, AJ; Carter, SP; Kennedy, BN	a UCD School of Biomolecular and Biomedical Science, UCD Conway Institute , University College Dublin , Belfield , Ireland.	click here	click here	click here	click here	journal
28383341	10.1097/MOH.0000000000000343	Generating autologous hematopoietic cells from human-induced pluripotent stem cells through ectopic expression of transcription factors.	Hematopoietic cell transplantation (HCT) is a successful treatment modality for patients with malignant and nonmalignant disorders, usually when no other treatment option is available. The cells supporting long-term reconstitution after HCT are the hematopoietic stem cells (HSCs), which can be limited in numbers. Moreover, finding an appropriate human leukocyte antigen-matched donor can be proble…	eng	Current opinion in hematology	Curr Opin Hematol	9430802	2017	Jul		24	4	283-288	Internet	Yongsung Hwang	Hwang, Y; Broxmeyer, HE; Lee, MR	aSoonchunhyang Institute of Medi-bio Science (SIMS) bInstitute of Tissue Regeneration, College of Medicine, Soon Chun Hyang University, Cheonan-si, Chungcheongnam-do, Republic of Korea cDepartment of Microbiology and Immunology, Indiana University School of Medicine, Indianapolis, Indiana, USA.	click here	click here	click here	click here	journal
29130158	10.1007/978-3-319-63904-8_8	CRISPR in the Retina: Evaluation of Future Potential.	Clustered regularly interspaced short palindromic repeats (CRISPR) has been gaining widespread attention for its ability for targeted genome surgery. In treating inherited retinal degenerations, gene therapies have had varied results; the ones effective in restoring eye sight are limited by transiency in its effect. Genome surgery, however, is a solution that could potentially provide the eye wit…	eng	Advances in experimental medicine and biology	Adv Exp Med Biol	0121103	2017			1016		147-155	Print	Galaxy Y Cho	Cho, GY; Justus, S; Sengillo, JD; Tsang, SH	Institute of Human Nutrition, College of Physicians and Surgeons, Columbia University, New York, NY, USA.	click here	click here	click here	click here	journal
29150006	10.1016/bs.pmbts.2017.09.001	Genome Engineering Using Haploid Embryonic Stem Cells.	Haploidy is a useful feature for the study of gene function because disruption of one allele in haploid cells, which contain only a single set of chromosomes, can cause loss-of-function phenotypes. Recent success in generating haploid embryonic stem (ES) cells from several mammalian species, including human, provides a new platform for simple genetic manipulation of the mammalian genome. The geno…	eng	Progress in molecular biology and translational science	Prog Mol Biol Transl Sci	101498165	2017			152		83-94	Internet	Takuro Horii	Horii, T; Hatada, I	Biosignal Genome Resource Center, Institute for Molecular and Cellular Regulation, Gunma University, Maebashi, Gunma, Japan. Electronic address: horii@gunma-u.ac.jp.	click here	click here	click here	click here	journal
28527722	10.1016/j.ymthe.2017.04.027	CRISPR/Cas9-Mediated CCR5 Ablation in Human Hematopoietic Stem/Progenitor Cells Confers HIV-1 Resistance In Vivo.	Transplantation of hematopoietic stem cells (HSCs) with a naturally occurring CCR5 mutation confers a loss of detectable HIV-1 in the patient, making ablation of the CCR5 gene in HSCs an ideal therapy for an HIV-1 cure. Although CCR5 disruption has been attempted in CD4+T cells and hematopoietic stem/progenitor cells (HSPCs), efficient gene editing with high specificity and long-term therapeutic …	eng	Molecular therapy : the journal of the American Society of Gene Therapy	Mol Ther	100890581	2017	Aug		25	8	1782-1789	Internet	Lei Xu	Xu, L; Yang, H; Gao, Y; Chen, Z; Xie, L; Liu, Y; Liu, Y; Wang, X; Li, H; Lai, W; He, Y; Yao, A; Ma, L; Shao, Y; Zhang, B; Wang, C; Chen, H; Deng, H	Department of Hematopoietic Stem Cell Transplantation, 307 Hospital of PLA, Beijing 100071, China; Cell and Gene Therapy Center, Academy of Military Medical Sciences, Beijing 100850, China.	click here	click here	click here	click here	journal
27956228	10.1053/j.gastro.2016.12.002	Genome-Wide CRISPR Screen Identifies Regulators of Mitogen-Activated Protein Kinase as Suppressors of Liver Tumors in Mice.	It has been a challenge to identify liver tumor suppressors or oncogenes due to the genetic heterogeneity of these tumors. We performed a genome-wide screen to identify suppressors of liver tumor formation in mice, using CRISPR-mediated genome editing.We performed a genome-wide CRISPR/Cas9-based knockout screen of P53-null mouse embryonic liver progenitor cells that overexpressed MYC. We infected…	eng	Gastroenterology	Gastroenterology	0374630	2017	Apr		152	5	1161-1173.e1	Internet	Chun-Qing Song	Song, CQ; Li, Y; Mou, H; Moore, J; Park, A; Pomyen, Y; Hough, S; Kennedy, Z; Fischer, A; Yin, H; Anderson, DG; Conte, D; Zender, L; Wang, XW; Thorgeirsson, S; Weng, Z; Xue, W	RNA Therapeutics Institute, University of Massachusetts Medical School, Worcester, Massachusetts.	click here	click here	click here	click here	journal
29203787	10.1038/s41598-017-17119-1	CRISPR/Cas9-derived models of ovarian high grade serous carcinoma targeting Brca1, Pten and Nf1, and correlation with platinum sensitivity.	Transplantable murine models of ovarian high grade serous carcinoma (HGSC) remain an important research tool. We previously showed that ID8, a widely-used syngeneic model of ovarian cancer, lacked any of the frequent mutations in HGSC, and used CRISPR/Cas9 gene editing to generate derivatives with deletions in Trp53 and Brca2. Here we have used one ID8 Trp53-/-clone to generate further mutants, w…	eng	Scientific reports	Sci Rep	101563288	2017	Dec		7	1	16827	Internet	Josephine B Walton	Walton, JB; Farquharson, M; Mason, S; Port, J; Kruspig, B; Dowson, S; Stevenson, D; Murphy, D; Matzuk, M; Kim, J; Coffelt, S; Blyth, K; McNeish, IA	Institute of Cancer Sciences, University of Glasgow, Glasgow, UK.	click here	click here	click here	click here	journal
28280211	10.1534/g3.117.040824	Reliable CRISPR/Cas9 Genome Engineering inCaenorhabditis elegansUsing a Single Efficient sgRNA and an Easily Recognizable Phenotype.	CRISPR/Cas9 genome engineering strategies allow the directed modification of theCaenorhabditis elegansgenome to introduce point mutations, generate knock-out mutants, and insert coding sequences for epitope or fluorescent tags. Three practical aspects, however, complicate such experiments. First, the efficiency and specificity of single-guide RNAs (sgRNA) cannot be reliably predicted. Second, the…	eng	G3 (Bethesda, Md.)	G3 (Bethesda)	101566598	2017	May		7	5	1429-1437	Internet	Sonia El Mouridi	El Mouridi, S; Lecroisey, C; Tardy, P; Mercier, M; Leclercq-Blondel, A; Zariohi, N; Boulin, T	Univ Lyon, Université Claude Bernard Lyon 1, CNRS UMR-5310, INSERM U-1217, Institut NeuroMyoGène, F-69622 Villeurbanne, France.	click here	click here	click here	click here	journal
28624206	10.1016/j.omtn.2017.02.007	CRISPR/Cas9-Mediated Genome Editing Corrects Dystrophin Mutation in Skeletal Muscle Stem Cells in a Mouse Model of Muscle Dystrophy.	Muscle stem cells (MuSCs) hold great therapeutic potential for muscle genetic disorders, such as Duchenne muscular dystrophy (DMD). The CRISP/Cas9-based genome editing is a promising technology for correcting genetic alterations in mutant genes. In this study, we used fibrin-gel culture system to selectively expand MuSCs from crude skeletal muscle cells of mdx mice, a mouse model of DMD. By CRISP…	eng	Molecular therapy. Nucleic acids	Mol Ther Nucleic Acids	101581621	2017	Jun		7		31-41	Print	Pei Zhu	Zhu, P; Wu, F; Mosenson, J; Zhang, H; He, TC; Wu, WS	Division of Hematology/Oncology, Department of Medicine and Cancer Center, University of Illinois at Chicago, Chicago, IL 60612, USA.	click here	click here	click here	click here	journal
28814758	10.1038/s41598-017-09030-6	Targeted insertion of an anti-CD2 monoclonal antibody transgene into the GGTA1 locus in pigs using FokI-dCas9.	Xenotransplantation from pigs has been advocated as a solution to the perennial shortage of donated human organs and tissues. CRISPR/Cas9 has facilitated the silencing of genes in donor pigs that contribute to xenograft rejection. However, the generation of modified pigs using second-generation nucleases with much lower off-target mutation rates than Cas9, such as FokI-dCas9, has not been reporte…	eng	Scientific reports	Sci Rep	101563288	2017	Aug		7	1	8383	Internet	Mark B Nottle	Nottle, MB; Salvaris, EJ; Fisicaro, N; McIlfatrick, S; Vassiliev, I; Hawthorne, WJ; O'Connell, PJ; Brady, JL; Lew, AM; Cowan, PJ	Robinson Research Institute & Adelaide School of Medicine, University of Adelaide, Adelaide, Australia.	click here	click here	click here	click here	journal
28875532	10.1002/dvg.23068	Axin2-mTurquoise2: A novel reporter mouse model for the detection of canonical Wnt signalling.	The canonical Wnt signalling pathway has been implicated in organogenesis and self-renewal of essentially all stem cell systems. In vivo reporter systems are crucial to assess the role of Wnt signalling in the biology and pathology of stem cell systems. We set out to develop a Turquoise (TQ) fluorescent protein based Wnt reporter. We used a CRISPR-Cas9 approach to insert a TQ fluorescent protein …	eng	Genesis (New York, N.Y. : 2000)	Genesis	100931242	2017	Oct		55	10		Internet	Jolanda J D de Roo	de Roo, JJD; Breukel, C; Chhatta, AR; Linssen, MM; Vloemans, SA; Salvatori, D; Mikkers, HMM; Verbeek, SJ; Staal, FJT	Department of Immunohematology and Blood Transfusion, Leiden University Medical Center, The Netherlands.	click here	click here	click here	click here	journal
28867677	10.1262/jrd.2017-067	C-X-C chemokine receptor type 4 (CXCR4) is a key receptor for chicken primordial germ cell migration.	In mammals, germ cells originate outside of the developing gonads and follow a unique migration pattern through the embryonic tissue toward the genital ridges. Many studies have attempted to identify critical receptors and factors involved in germ cell migration. However, relatively few reports exist on germ cell receptors and chemokines that are involved in germ cell migration in avian species. …	eng	The Journal of reproduction and development	J Reprod Dev	9438792	2017	Dec		63	6	555-562	Internet	Jeong Hyo Lee	Lee, JH; Park, JW; Kim, SW; Park, J; Park, TS	Graduate School of International Agricultural Technology and Institute of Green-Bio Science and Technology, Seoul National University, Gangwon-do 232-916, Korea.	click here	click here	click here	click here	journal
28533980	10.7717/peerj.3339	Mitochondrial complex I deficiency leads to the retardation of early embryonic development inNdufs4knockout mice.	TheNDUFS4gene encodes an 18-kD subunit of mitochondria complex I, and mutations in this gene lead to the development of a severe neurodegenerative disease called Leigh syndrome (LS) in humans. To investigate the disease phenotypes and molecular mechanisms of Leigh syndrome, theNdufs4knockout (KO) mouse has been widely used as a novel animal model. Because the homozygotes cannot survive beyond chi…	eng	PeerJ	PeerJ	101603425	2017			5		e3339	Print	Mei Wang	Wang, M; Huang, YP; Wu, H; Song, K; Wan, C; Chi, AN; Xiao, YM; Zhao, XY	State Key Laboratory of Developmental Biology of Freshwater Fish, Hunan Normal University, Changsha, China.	click here	click here	click here	click here	journal
28659174	10.1186/s13046-017-0561-x	CRISPR/Cas9 targeting of GPRC6A suppresses prostate cancer tumorigenesis in a human xenograft model.	GPRC6A is implicated in the pathogenesis of prostate cancer, but its role remains uncertain because of a purported tolerant gene variant created by substitution of a K..Y polymorphism in the 3rd intracellular loop (IL) that evolved in the majority of humans and replaces the ancestral RKLP present in 40% of humans of African descent and all other species.We determined whether the K..Y polymorphism…	eng	Journal of experimental & clinical cancer research : CR	J Exp Clin Cancer Res	8308647	2017	Jun		36	1	90	Internet	Ruisong Ye	Ye, R; Pi, M; Cox, JV; Nishimoto, SK; Quarles, LD	Department of Medicine, University of Tennessee Health Science Center, 19 S Manassas St., Memphis, TN, 38163, USA.	click here	click here	click here	click here	journal
28646452	10.1007/s00439-017-1822-7	Dosage effects of ZP2 and ZP3 heterozygous mutations cause human infertility.	The zona pellucida (ZP) is an extracellular matrix universally surrounding mammalian eggs, which is essential for oogenesis, fertilization, and pre-implantation embryo development. Here, we identified two novel heritable mutations of ZP2 and ZP3, both occurring in an infertile female patient with ZP-abnormal eggs. Mouse models with the same mutations were generated by CRISPR/Cas9 gene editing sys…	eng	Human genetics	Hum Genet	7613873	2017	08		136	8	975-985	Internet	Wenqiang Liu	Liu, W; Li, K; Bai, D; Yin, J; Tang, Y; Chi, F; Zhang, L; Wang, Y; Pan, J; Liang, S; Guo, Y; Ruan, J; Kou, X; Zhao, Y; Wang, H; Chen, J; Teng, X; Gao, S	Clinical and Translational Research Center of Shanghai First Maternity and Infant Hospital, Shanghai Key Laboratory of Signaling and Disease Research, School of Life Sciences and Technology, Tongji University, Shanghai, 200092, China.	click here	click here	click here	click here	journal
28155097	10.1007/s11948-017-9875-5	Gene Editing, Enhancing and Women's Role.	A recent article on the front page of The Independent (September 18, 2015) reported that the genetic 'manipulation' of IVF embryos is to start in Britain, using a new revolutionary gene-editing technique, called Crispr/Cas9. About three weeks later (Saturday 10, October 2015), on the front page of the same newspaper, it was reported that the National Health Service (NHS) faces a one billion pound…	eng	Science and engineering ethics	Sci Eng Ethics	9516228	2017	Feb					Internet	Frida Simonstein	Simonstein, F	Department of Health Systems Management, Max Stern Yezreel Valley College, D.N. Emek Yezreel, 19300, Jezreel Valley, Israel. fridas@yvc.ac.il.	click here	click here	click here	click here	journal
28978917	10.1038/s41598-017-12836-z	Chronic sun exposure-related fusion oncogenes EGFR-PPARGC1A in cutaneous squamous cell carcinoma.	Cutaneous squamous cell carcinoma (cSCC) differs from SCC of other organs in its strong association with chronic sun exposure. However, the specific driver mutations in cSCC remain unknown. Fusion genes in established cSCC cell lines (A431 and DJM-1) were predicted by transcriptome sequence, and validated by Sanger sequence, fluorescence in situ hybridization and G-banding. By transcriptome seque…	eng	Scientific reports	Sci Rep	101563288	2017	Oct		7	1	12654	Internet	Sho Egashira	Egashira, S; Jinnin, M; Ajino, M; Shimozono, N; Okamoto, S; Tasaki, Y; Hirano, A; Ide, M; Kajihara, I; Aoi, J; Harada, M; Igata, T; Masuguchi, S; Fukushima, S; Ihn, H	Department of Dermatology and Plastic Surgery, Faculty of Life Sciences, Kumamoto University, 1-1-1 Honjo, Chuo-ku, Kumamoto, 860-8556, Japan.	click here	click here	click here	click here	journal
28589077	10.1016/j.apsb.2017.01.002	Application of CRISPR/Cas9 in plant biology.	The CRISPR/Cas (clustered regularly interspaced short palindromic repeats/CRISPR-associated proteins) system was first identified in bacteria and archaea and can degrade exogenous substrates. It was developed as a gene editing technology in 2013. Over the subsequent years, it has received extensive attention owing to its easy manipulation, high efficiency, and wide application in gene mutation an…	eng	Acta pharmaceutica Sinica. B	Acta Pharm Sin B	101600560	2017	May		7	3	292-302	Print	Xuan Liu	Liu, X; Wu, S; Xu, J; Sui, C; Wei, J	Institute of Medicinal Plant Development, Chinese Academy of Medical Sciences, Peking Union Medical College, Beijing 100193, China.	click here	click here	click here	click here	journal
28758991	10.1038/nplants.2017.107	Progress and prospects in plant genome editing.	The emergence of sequence-specific nucleases that enable genome editing is revolutionizing basic and applied biology. Since the introduction of CRISPR-Cas9, genome editing has become widely used in transformable plants for characterizing gene function and improving traits, mainly by inducing mutations through non-homologous end joining of double-stranded breaks generated by CRISPR-Cas9. However, …	eng	Nature plants	Nat Plants	101651677	2017	Jul		3		17107	Internet	Kangquan Yin	Yin, K; Gao, C; Qiu, JL	State Key Laboratory of Plant Genomics, Institute of Microbiology, Chinese Academy of Sciences, Beijing 100101, China.	click here	click here	click here	click here	journal
28261237	10.3389/fpls.2017.00177	Progress in Genome Editing Technology and Its Application in Plants.	Genome editing technology (GET) is a versatile approach that has progressed rapidly as a mechanism to alter the genotype and phenotype of organisms. However, conventional genome modification using GET cannot satisfy current demand for high-efficiency and site-directed mutagenesis, retrofitting of artificial nucleases has developed into a new avenue within this field. Based on mechanisms to recogn…	eng	Frontiers in plant science	Front Plant Sci	101568200	2017			8		177	Print	Kai Zhang	Zhang, K; Raboanatahiry, N; Zhu, B; Li, M	Department of Biotechnology, College of Life Science and Technology, Huazhong University of Science and TechnologyWuhan, China; Hubei Collaborative Innovation Center for the Characteristic Resources Exploitation of Dabie Mountains, Huanggang Normal UniversityHuanggang, China.	click here	click here	click here	click here	journal
27562951	10.1093/bfgp/elw032	Therapeutic applications of CRISPR RNA-guided genome editing.	The rapid development of programmable nuclease-based genome editing technologies has enabled targeted gene disruption and correction both in vitro and in vivo This revolution opens up the possibility of precise genome editing at target genomic sites to modulate gene function in animals and plants. Among several programmable nucleases, the type II clustered regularly interspaced short palindromic …	eng	Briefings in functional genomics	Brief Funct Genomics	101528229	2017	Jan		16	1	38-45	Internet	Taeyoung Koo	Koo, T; Kim, JS		click here	click here	click here	click here	journal
28625564	10.1016/j.gene.2017.06.019	CRISPR system in filamentous fungi: Current achievements and future directions.	As eukaryotes, filamentous fungi share many features with humans, and they produce numerous active metabolites, some of which are toxic. Traditional genetic approaches are generally inefficient, but the clustered regularly interspaced short palindromic repeats (CRISPR)/Cas9 system that has been widely used for basic research on bacteria, mammals and plants offers a simple, fast, versatile technol…	eng	Gene	Gene	7706761	2017	Sep		627		212-221	Internet	Huaxiang Deng	Deng, H; Gao, R; Liao, X; Cai, Y	The Key Laboratory of Industrial Biotechnology, Ministry of Education, School of Biotechnology, Jiangnan University, 1800 Lihu Road, Wuxi, Jiangsu 214122, People's Republic of China.	click here	click here	click here	click here	journal
28451378	10.1186/s13578-017-0148-4	Plant genome editing with TALEN and CRISPR.	Genome editing promises giant leaps forward in advancing biotechnology, agriculture, and basic research. The process relies on the use of sequence specific nucleases (SSNs) to make DNA double stranded breaks at user defined genomic loci, which are subsequently repaired by two main DNA repair pathways: non-homologous end joining (NHEJ) and homology directed repair (HDR). NHEJ can result in framesh…	eng	Cell & bioscience	Cell Biosci	101561195	2017			7		21	Print	Aimee Malzahn	Malzahn, A; Lowder, L; Qi, Y	Department of Plant Science and Landscape Architecture, University of Maryland, College Park, MD 20742 USA.	click here	click here	click here	click here	journal
27093352	10.3109/07388551.2016.1165180	Targeted genome regulation via synthetic programmable transcriptional regulators.	Regulation of gene transcription controls cellular functions and coordinates responses to developmental, physiological and environmental cues. Precise and efficient molecular tools are needed to characterize the functions of single and multiple genes in linear and interacting pathways in a native context. Modular DNA-binding domains from zinc fingers (ZFs) and transcriptional activator-like prote…	eng	Critical reviews in biotechnology	Crit Rev Biotechnol	8505177	2017	Jun		37	4	429-440	Internet	Agnieszka Piatek	Piatek, A; Mahfouz, MM	a Laboratory for Genome Engineering, Center for Desert Agriculture and Division of Biological and Environmental Sciences and Engineering , King Abdullah University of Science and Technology , Thuwal , Jeddah , Saudi Arabia.	click here	click here	click here	click here	journal
28815851	10.1111/rda.13012	Basics of genome editing technology and its application in livestock species.	In the last decade, the research community has witnessed a blooming of targeted genome editing tools and applications. Novel programmable DNA nucleases such as zinc finger nucleases (ZFNs), transcription activator-like endonucleases (TALENs) and the clustered regularly interspaced short palindromic repeats/Cas9 system (CRISPR/Cas9) possess long recognition sites and are capable of cutting DNA in …	eng	Reproduction in domestic animals = Zuchthygiene	Reprod Domest Anim	9015668	2017	Aug		52 Suppl 3		4-13	Internet	Bjoern Petersen	Petersen, B	Friedrich-Loeffler-Institut, Institute of Farm Animal Genetics, Neustadt am Rbge, Germany.	click here	click here	click here	click here	journal
28810059	10.1002/wdev.287	Targeted genome editing in Caenorhabditis elegans using CRISPR/Cas9.	Utilization of programmable nucleases to generate DNA lesions at precise endogenous sequences has transformed the ability to edit genomes from microbes to plants and animals. This is especially true in organisms that previously lacked the means to engineer precise genomic changes, like Caenorhabditis elegans. C. elegans is a 1 mm long free-living, nonparasitic, nematode worm, which is easily cult…	eng	Wiley interdisciplinary reviews. Developmental biology	Wiley Interdiscip Rev Dev Biol	101576624	2017	Nov		6	6		Internet	Behnom Farboud	Farboud, B	Department of Molecular and Cell Biology, University of California, Berkeley, Berkeley, CA, USA.	click here	click here	click here	click here	journal
28392798	10.3389/fpls.2017.00408	The Search for Resistance to Cassava Mosaic Geminiviruses: How Much We Have Accomplished, and What Lies Ahead.	The cassava mosaic disease (CMD), which occurs in all cassava growing regions of Africa and the Indian subcontinent, is caused by cassava mosaic geminiviruses (CMGs). CMGs are considered to be the most damaging vector-borne plant pathogens. So far, the most successful approach used to control these viruses has been the transfer of a polygenic recessive resistance locus, designated CMD1, from wild…	eng	Frontiers in plant science	Front Plant Sci	101568200	2017			8		408	Print	Vincent N Fondong	Fondong, VN	Department of Biological Sciences, Delaware State University Dover, DE, USA.	click here	click here	click here	click here	journal
27253613		Genome Editing with Engineered Nucleases in Economically Important Animals and Plants: State of the Art in the Research Pipeline.	After induced mutagenesis and transgenesis, genome editing is the next step in the development of breeding techniques. Genome editing using site-directed nucleases - including meganucleases, zinc-finger nucleases (ZFNs), transcription activator-like effector nucleases (TALENs), and the CRISPR/Cas9 system - is based on the mechanism of double strand breaks. The nuclease is directed to cleave the D…	eng	Current issues in molecular biology	Curr Issues Mol Biol	100931761	2017			21		41-62	Internet	Tereza Sovová	Sovová, T; Kerins, G; Demnerová, K; Ovesná, J	Crop Research Institute, Department of Molecular Genetics, Drnovská 507, 161 06 Prague, Czech Republic.	click here	click here	click here	click here	journal
28955474	10.1186/s40694-017-0035-0	A silver bullet in a golden age of functional genomics: the impact ofAgrobacterium-mediated transformation of fungi.	The implementation ofAgrobacterium tumefaciensas a transformation tool revolutionized approaches to discover and understand gene functions in a large number of fungal species.A. tumefaciensmediated transformation (AtMT) is one of the most transformative technologies for research on fungi developed in the last 20 years, a development arguably only surpassed by the impact of genomics.AtMT has been …	eng	Fungal biology and biotechnology	Fungal Biol Biotechnol	101655873	2017			4		6	Print	Alexander Idnurm	Idnurm, A; Bailey, AM; Cairns, TC; Elliott, CE; Foster, GD; Ianiri, G; Jeon, J	School of BioSciences, University of Melbourne, Melbourne, VIC 3010 Australia.	click here	click here	click here	click here	journal
29230929	10.1111/pbi.12870	Application of protoplast technology to CRISPR/Cas9 mutagenesis: from single-cell mutation detection to mutant plant regeneration.	Plant protoplasts are useful for assessing the efficiency of clustered regularly interspaced short palindromic repeats (CRISPR)/CRISPR-associated protein 9 (Cas9) mutagenesis. We improved the process of protoplast isolation and transfection of several plant species. We also developed a method to isolate and regenerate single mutagenized Nicotianna tabacum protoplasts into mature plants. Following…	eng	Plant biotechnology journal	Plant Biotechnol J	101201889	2017	Dec					Internet	Choun-Sea Lin	Lin, CS; Hsu, CT; Yang, LH; Lee, LY; Fu, JY; Cheng, QW; Wu, FH; Hsiao, HC; Zhang, Y; Zhang, R; Chang, WJ; Yu, CT; Wang, W; Liao, LJ; Gelvin, SB; Shih, MC	Agricultural Biotechnology Research Center, Academia Sinica, Taipei, Taiwan.	click here	click here	click here	click here	journal
28160363	10.1111/pbi.12702	Establishment of a tobacco BY2 cell line devoid of plant-specific xylose and fucose as a platform for the production of biotherapeutic proteins.	Plant-produced glycoproteins contain N-linked glycans with plant-specific residues of β(1,2)-xylose and core α(1,3)-fucose, which do not exist in mammalian-derived proteins. Although our experience with two enzymes that are used for enzyme replacement therapy does not indicate that the plant sugar residues have deleterious effects, we made a conscious decision to eliminate these moieties from pla…	eng	Plant biotechnology journal	Plant Biotechnol J	101201889	2017	Sep		15	9	1120-1129	Internet	Uri Hanania	Hanania, U; Ariel, T; Tekoah, Y; Fux, L; Sheva, M; Gubbay, Y; Weiss, M; Oz, D; Azulay, Y; Turbovski, A; Forster, Y; Shaaltiel, Y	Protalix Biotherapeutics, Carmiel, Israel.	click here	click here	click here	click here	journal
28912524	10.1038/s41598-017-11760-6	Precise insertion and guided editing of higher plant genomes using Cpf1 CRISPR nucleases.	Precise genome editing of plants has the potential to reshape global agriculture through the targeted engineering of endogenous pathways or the introduction of new traits. To develop a CRISPR nuclease-based platform that would enable higher efficiencies of precise gene insertion or replacement, we screened the Cpf1 nucleases from Francisella novicida and Lachnospiraceae bacterium ND2006 for their…	eng	Scientific reports	Sci Rep	101563288	2017	Sep		7	1	11606	Internet	Matthew B Begemann	Begemann, MB; Gray, BN; January, E; Gordon, GC; He, Y; Liu, H; Wu, X; Brutnell, TP; Mockler, TC; Oufattole, M	Benson Hill Biosystems, 1100 Corporate Square Dr, St. Louis, MO, 63132, USA. mbegemann@bensonhillbio.com.	click here	click here	click here	click here	journal
29089547	10.1038/s41598-017-14832-9	Knockout of OsNramp5 using the CRISPR/Cas9 system produces low Cd-accumulating indica rice without compromising yield.	Rice grain with excessive cadmium (Cd) is a major source of dietary Cd intake and a serious threat to health for people who consume rice as a staple food. The development of elite rice cultivars with consistently low Cd content is challenging for conventional breeding approaches, and new strategies urgently need to be developed. Here, we report the development of new indica rice lines with low Cd…	eng	Scientific reports	Sci Rep	101563288	2017	Oct		7	1	14438	Internet	Li Tang	Tang, L; Mao, B; Li, Y; Lv, Q; Zhang, L; Chen, C; He, H; Wang, W; Zeng, X; Shao, Y; Pan, Y; Hu, Y; Peng, Y; Fu, X; Li, H; Xia, S; Zhao, B	Hunan Provincial Key Laboratory of Phytohormones and Growth Development, College of Bioscience and Biotechnology, Hunan Agricultural University, Changsha, 410128, China.	click here	click here	click here	click here	journal
28502081	10.1111/tpj.13599	Simultaneous modification of three homoeologs of TaEDR1 by genome editing enhances powdery mildew resistance in wheat.	Wheat (Triticum aestivum L.) incurs significant yield losses from powdery mildew, a major fungal disease caused by Blumeria graminis f. sp. tritici (Bgt). enhanced disease resistance1 (EDR1) plays a negative role in the defense response against powdery mildew in Arabidopsis thaliana; however, the edr1 mutant does not show constitutively activated defense responses. This makes EDR1 an ideal target…	eng	The Plant journal : for cell and molecular biology	Plant J	9207397	2017	Aug		91	4	714-724	Internet	Yunwei Zhang	Zhang, Y; Bai, Y; Wu, G; Zou, S; Chen, Y; Gao, C; Tang, D	State Key Laboratory of Plant Cell and Chromosome Engineering, Institute of Genetics and Development Biology, Chinese Academy of Sciences, Beijing, 100101, China.	click here	click here	click here	click here	journal
28507698	10.1039/c6sc04265a	Formicamycins, antibacterial polyketides produced byStreptomyces formicaeisolated from AfricanTetraponeraplant-ants.	We report a newStreptomycesspecies namedS. formicaethat was isolated from the African fungus-growing plant-antTetraponera penzigiand show that it produces novel pentacyclic polyketides that are active against MRSA and VRE. The chemical scaffold of these compounds, which we have called the formicamycins, is similar to the fasamycins identified from the heterologous expression of clones isolated fr…	eng	Chemical science	Chem Sci	101545951	2017	Apr		8	4	3218-3227	Print	Zhiwei Qin	Qin, Z; Munnoch, JT; Devine, R; Holmes, NA; Seipke, RF; Wilkinson, KA; Wilkinson, B; Hutchings, MI	Department of Molecular Microbiology , John Innes Centre , Norwich Research Park , Norwich , NR4 7UH , UK . Email: barrie.wilkinson@jic.ac.uk.	click here	click here	click here	click here	journal
28089076	10.1016/j.fgb.2016.12.003	Comparative analyses of secreted proteins in plant pathogenic smut fungi and related basidiomycetes.	In the ten years since the genome sequence of the basidiomycete corn smut fungus Ustilago maydis was published, additional genomes of smut species infecting different hosts became available. In addition, the genomes of related Malassezia species causing skin diseases and of Pseudozyma species not known to infect plants were determined. As secreted proteins are critical virulence determinants in U…	eng	Fungal genetics and biology : FG & B	Fungal Genet Biol	9607601	2017	Jan					Internet	Mariana Schuster	Schuster, M; Schweizer, G; Kahmann, R	Max Planck Institute for Terrestrial Microbiology, Dept. Organismic Interactions, 35043 Marburg, Germany.	click here	click here	click here	click here	journal
29247303	10.1186/s12284-017-0190-1	Root cone angle is enlarged in docs1 LRR-RLK mutants in rice.	The DEFECTIVE IN OUTER CELL LAYER SPECIFICATION 1 (DOCS1) gene belongs to the Leucine-Rich Repeat Receptor-Like Kinase (LRR-RLK) subfamily. It has been discovered few years ago in Oryza sativa (rice) in a screen to isolate mutants with defects in sensitivity to aluminum. The c68 (docs1-1) mutant possessed a nonsense mutation in the C-terminal part of the DOCS1 kinase domain.We have generated a ne…	eng	Rice (New York, N.Y.)	Rice (N Y)	101503136	2017	Dec		10	1	50	Print	M Bettembourg	Bettembourg, M; Dal-Soglio, M; Bureau, C; Vernet, A; Dardoux, A; Portefaix, M; Bes, M; Meynard, D; Mieulet, D; Cayrol, B; Perin, C; Courtois, B; Ma, JF; Dievart, A	CIRAD, UMR AGAP, F34398, Montpellier, France.	click here	click here	click here	click here	journal
28623586	10.1007/978-1-4939-7125-1_12	Multiplexed Transcriptional Activation or Repression in Plants Using CRISPR-dCas9-Based Systems.	Novel tools and methods for regulating in vivo plant gene expression are quickly gaining popularity and utility due to recent advances in CRISPR-dCas9 chimeric effector regulators, otherwise known as CRISPR artificial transcription factors (CRISPR-ATFs). These tools are especially useful for studying gene function and interaction within various regulatory networks. First generation CRISPR-ATFs ar…	eng	Methods in molecular biology (Clifton, N.J.)	Methods Mol Biol	9214969	2017			1629		167-184	Internet	Levi G Lowder	Lowder, LG; Paul, JW; Qi, Y	Department of Biology, East Carolina University, Greenville, NC, 27858, USA.	click here	click here	click here	click here	journal
29226588	10.1111/jipb.12622	Multigene editing via CRISPR/Cas9 guided by a single-sgRNA seed in Arabidopsis.	We report that a solo single-guide RNA (sgRNA) seed is capable of guiding Clustered Regularly Interspaced Short Palindromic Repeats (CRISPR)/CRISPR -associated 9 (CRISRP/Cas9) to simultaneously edit multiple genes AtRPL10A, AtRPL10B and AtRPL10C in Arabidopsis. Our results also demonstrate that it is possible to use CRISPR/Cas9 technology to create AtRPL10 triple mutants which otherwise cannot be…	eng	Journal of integrative plant biology	J Integr Plant Biol	101250502	2017	Dec					Internet	Zhiming Yu	Yu, Z; Chen, Q; Chen, W; Zhang, X; Mei, F; Zhang, P; Zhao, M; Wang, X; Shi, N; Jackson, S; Hong, Y	Research Centre for Plant RNA Signaling, College of Life and Environmental Sciences, Hangzhou Normal University, Hangzhou 310036, China.	click here	click here	click here	click here	journal
28289885	10.1007/s00299-017-2125-0	Generation of stable nulliplex autopolyploid lines of Arabidopsis thaliana using CRISPR/Cas9 genome editing.	RNA-guided endonuclease-mediated targeted mutagenesis using the clustered regularly interspersed short palindromic repeats (CRISPR)/Cas9 system has been successful at targeting specific loci for modification in plants. While polyploidy is an evolutionary mechanism enabling plant adaptation, the analysis of gene function in polyploid plants has been limited due to challenges associated with genera…	eng	Plant cell reports	Plant Cell Rep	9880970	2017	Jun		36	6	1005-1008	Internet	Peter Ryder	Ryder, P; McHale, M; Fort, A; Spillane, C	Genetics and Biotechnology Laboratory, School of Natural Sciences, Plant and AgriBiosciences Research Centre (PABC), National University of Ireland Galway, University Road, Galway, Ireland.	click here	click here	click here	click here	journal
28166383	10.1002/cpmc.25	Efficient Genome Editing in the Oomycete Phytophthora sojae Using CRISPR/Cas9.	Phytophthora is a filamentous fungus-like microorganism, but belongs to the oomycetes, in the kingdom Stramenopila. Phytophthora species are notorious as plant destroyers, causing multibillion-dollar damage to agriculture and natural ecosystems worldwide annually. For a long time, genome editing has been unattainable in oomycetes, because of their extremely low rate of homologous recombination. T…	eng	Current protocols in microbiology	Curr Protoc Microbiol	101257113	2017	Feb		44		21A.1.1-21A.1.26	Internet	Yufeng Fang	Fang, Y; Cui, L; Gu, B; Arredondo, F; Tyler, BM	Interdisciplinary Ph.D. Program in Genetics, Bioinformatics and Computational Biology, Virginia Tech, Blacksburg, Virginia.	click here	click here	click here	click here	journal
28287154	10.1038/srep44304	Targeted mutagenesis in cotton (Gossypium hirsutum L.) using the CRISPR/Cas9 system.	The CRISPR (Clustered Regularly Interspaced Short Palindromic Repeats)/Cas9 system has been widely used for genome editing in various plants because of its simplicity, high efficiency and design flexibility. However, to our knowledge, there is no report on the application of CRISPR/Cas9-mediated targeted mutagenesis in cotton. Here, we report the genome editing and targeted mutagenesis in upland …	eng	Scientific reports	Sci Rep	101563288	2017	Mar		7		44304	Internet	Xiugui Chen	Chen, X; Lu, X; Shu, N; Wang, S; Wang, J; Wang, D; Guo, L; Ye, W	State Key Laboratory of Cotton Biology/Institute of Cotton Research of Chinese Academy of Agricultural Sciences, Anyang, Henan 455000, China.	click here	click here	click here	click here	journal
28622347	10.1371/journal.pone.0179410	RNA-guided transcriptional activation via CRISPR/dCas9 mimics overexpression phenotypes in Arabidopsis.	Clustered regularly interspaced short palindromic repeats (CRISPR) and the CRISPR associated protein 9 (Cas9) system allows effective gene modification through RNA-guided DNA targeting. The Cas9 has undergone a series of functional alterations from the original active endonuclease to partially or completely deactivated Cas9. The catalytically deactivated Cas9 (dCas9) offers a platform to regulate…	eng	PloS one	PLoS One	101285081	2017			12	6	e0179410	Internet	Jong-Jin Park	Park, JJ; Dempewolf, E; Zhang, W; Wang, ZY	Forage Improvement Division, The Samuel Roberts Noble Foundation, Ardmore, Oklahoma, United States of America.	click here	click here	click here	click here	journal
28220435	10.1007/978-1-4939-6859-6_25	Rapid Construction of Multiplexed CRISPR-Cas9 Systems for Plant Genome Editing.	Multiplex CRISPR-Cas9 nuclease mediated genome editing is an efficient method for disrupting gene function in plants. Use of CRISPR-Cas9 has escalated rapidly in recent years and is expected to become routine practice in molecular biology and related fields of research. Due to the relatively novel and widespread adoption of this technology, first-time users may not have regular access to experien…	eng	Methods in molecular biology (Clifton, N.J.)	Methods Mol Biol	9214969	2017			1578		291-307	Internet	Levi Lowder	Lowder, L; Malzahn, A; Qi, Y	Department of Biology, University of Maryland, College Park, N 108 Howell Science Complex, Greenville, NC, 27858, USA.	click here	click here	click here	click here	journal
28955376	10.3389/fpls.2017.01598	CRISPR-Cas9 Based Genome Editing Reveals New Insights into MicroRNA Function and Regulation in Rice.	MicroRNAs (miRNAs) are small non-coding RNAs that play important roles in plant development and stress responses. Loss-of-function analysis of miRNA genes has been traditionally challenging due to lack of appropriate knockout tools. In this study, single miRNA genes (OsMIR408 and OsMIR528) and miRNA gene families (miR815a/b/c and miR820a/b/c) in rice were targeted by CRISPR-Cas9. We showed single…	eng	Frontiers in plant science	Front Plant Sci	101568200	2017			8		1598	Print	Jianping Zhou	Zhou, J; Deng, K; Cheng, Y; Zhong, Z; Tian, L; Tang, X; Tang, A; Zheng, X; Zhang, T; Qi, Y; Zhang, Y	Department of Biotechnology, School of Life Science and Technology, Center for Informational Biology, University of Electronic Science and Technology of ChinaChengdu, China.	click here	click here	click here	click here	journal
27900888	10.1080/09168451.2016.1189312	Using the CRISPR/Cas9 system to eliminate native plasmids of Zymomonas mobilis ZM4.	The CRISPR/Cas system can be used to simply and efficiently edit the genomes of various species, including animals, plants, and microbes. Zymomonas mobilis ZM4 is a highly efficient, ethanol-producing bacterium that contains five native plasmids. Here, we constructed the pSUZM2a-Cas9 plasmid and a single-guide RNA expression plasmid. The pSUZM2a-Cas9 plasmid was used to express the Cas9 gene clon…	eng	Bioscience, biotechnology, and biochemistry	Biosci Biotechnol Biochem	9205717	2017	Mar		81	3	453-459	Internet	Qing-Hua Cao	Cao, QH; Shao, HH; Qiu, H; Li, T; Zhang, YZ; Tan, XM	a Key Laboratory of Bio-resources and Eco-environment, Ministry of Education, College of Life Sciences , Sichuan University , Chengdu , Sichuan , China.	click here	click here	click here	click here	journal
28712496	10.1016/bs.pmbts.2017.03.009	Engineering Molecular Immunity Against Plant Viruses.	Genomic engineering has been used to precisely alter eukaryotic genomes at the single-base level for targeted gene editing, replacement, fusion, and mutagenesis, and plant viruses such as Tobacco rattle virus have been developed into efficient vectors for delivering genome-engineering reagents. In addition to altering the host genome, these methods can target pathogens to engineer molecular immun…	eng	Progress in molecular biology and translational science	Prog Mol Biol Transl Sci	101498165	2017			149		167-186	Internet	Syed Shan-E-Ali Zaidi	Zaidi, SS; Tashkandi, M; Mahfouz, MM	Laboratory for Genome Engineering, 4700 King Abdullah University of Science and Technology, Thuwal, Saudi Arabia; National Institute for Biotechnology and Genetic Engineering (NIBGE), Faisalabad, Pakistan.	click here	click here	click here	click here	journal
28855641	10.1038/s41598-017-10715-1	CRISPR/Cas9-mediated mutagenesis of the dihydroflavonol-4-reductase-B (DFR-B) locus in the Japanese morning glory Ipomoea (Pharbitis) nil.	CRISPR/Cas9 technology is a versatile tool for targeted mutagenesis in many organisms, including plants. However, this technique has not been applied to the Japanese morning glory (Ipomoea [Pharbitis] nil), a traditional garden plant chosen for the National BioResource Project in Japan. We selected dihydroflavonol-4-reductase-B (DFR-B) of I. nil, encoding an anthocyanin biosynthesis enzyme, as th…	eng	Scientific reports	Sci Rep	101563288	2017	Aug		7	1	10028	Internet	Kenta Watanabe	Watanabe, K; Kobayashi, A; Endo, M; Sage-Ono, K; Toki, S; Ono, M	Graduate School of Life and Environmental Sciences, University of Tsukuba, 1-1-1 Tennodai, Tsukuba, Ibaraki, 305-8572, Japan.	click here	click here	click here	click here	journal
28371831	10.1093/pcp/pcx034	A Split Staphylococcus aureus Cas9 as a Compact Genome-Editing Tool in Plants.	Split-protein methods-where a protein is split into two inactive fragments that must re-assemble to form an active protein-can be used to regulate the activity of a given protein and reduce the size of gene transcription units. Here, we show that a Staphylococcus aureus Cas9 (SaCas9) can be split, and that split-SaCas9 expressed from Agrobacterium can induce targeted mutagenesis in Nicotiana bent…	eng	Plant & cell physiology	Plant Cell Physiol	9430925	2017	04		58	4	643-649	Internet	Hidetaka Kaya	Kaya, H; Ishibashi, K; Toki, S	Plant Genome Engineering Research Unit, Institute of Agrobiological Sciences, National Agriculture and Food Research Organization, Kannondai, Tsukuba, Ibaraki, Japan.	click here	click here	click here	click here	journal
28286319	10.1016/j.fgb.2017.03.001	Establishment of CRISPR/Cas9 in Alternaria alternata.	The filamentous fungus Alternaria alternata is a potent producer of many secondary metabolites, some of which like alternariol or alternariol-methyl ether are toxic and/or cancerogenic. Many Alternaria species do not only cause post-harvest losses of food and feed, but are aggressive plant pathogens. Despite the great economic importance and the large number of research groups working with the fu…	eng	Fungal genetics and biology : FG & B	Fungal Genet Biol	9607601	2017	04		101		55-60	Internet	Maximilian Wenderoth	Wenderoth, M; Pinecker, C; Voß, B; Fischer, R	Karlsruhe Institute of Technology (KIT) - South Campus, Institute for Applied Biosciences, Dept. of Microbiology, Fritz-Haber-Weg 4, D-76131 Karlsruhe, Germany.	click here	click here	click here	click here	journal
29188185	10.1016/j.meteno.2017.08.002	Metabolic engineering ofSchizosaccharomyces pombevia CRISPR-Cas9 genome editing for lactic acid production from glucose and cellobiose.	Modification of the Schizosaccharomyces pombe genome is often laborious, time consuming due to the lower efficiency of homologous recombination. Here, we constructed metabolically engineered S. pombe strains using a CRISPR-Cas9 system and also demonstrated D-lactic acid (D-LA) production from glucose and cellobiose. Genes encoding two separate pyruvate decarboxylases (PDCs), an L-lactic acid dehy…	eng	Metabolic engineering communications	Metab Eng Commun	101642117	2017	Dec		5		60-67	Print	Aiko Ozaki	Ozaki, A; Konishi, R; Otomo, C; Kishida, M; Takayama, S; Matsumoto, T; Tanaka, T; Kondo, A	Department of Chemical Science and Engineering, Graduate School of Engineering, Kobe University, 1-1, Rokkodaicho, Nada, Kobe 657-8501, Japan.	click here	click here	click here	click here	journal
28220336	10.1007/s10142-017-0544-1	MicroRNAs in model and complex organisms.	Non-coding RNAs such as microRNAs (miRNAs) are very tiny ribonucleotides having an essential role in gene regulation at both post-transcriptional and translational levels. They are very conserved and expressed in worms, flies, plants, and mammals in a sequence-specific manner. Furthermore, it is now possible to clone miRNAs using the new genome editing tool CRISPR/cas9, which shows benefit in con…	eng	Functional & integrative genomics	Funct Integr Genomics	100939343	2017	May		17	2-3	121-124	Internet	Hikmet Budak	Budak, H; Zhang, B	Cereal Genomics Lab, Department of Plant Sciences and Plant Pathology, Montana State University, Bozeman, MT, USA. hikmet.budak@montana.edu.	click here	click here	click here	click here	journal
27699473	10.1007/s00299-016-2062-3	Efficient targeted multiallelic mutagenesis in tetraploid potato (Solanum tuberosum) by transient CRISPR-Cas9 expression in protoplasts.	Altered starch quality with full knockout of GBSS gene function in potato was achieved using CRISPR-Cas9 technology, through transient transfection and regeneration from isolated protoplasts. Site-directed mutagenesis (SDM) has shown great progress in introducing precisely targeted mutations. Engineered CRISPR-Cas9 has received increased focus compared to other SDM techniques, since the method is…	eng	Plant cell reports	Plant Cell Rep	9880970	2017	Jan		36	1	117-128	Internet	Mariette Andersson	Andersson, M; Turesson, H; Nicolia, A; Fält, AS; Samuelsson, M; Hofvander, P	Department of Plant Breeding, Swedish University of Agricultural Sciences, P.O. Box 101, SE-23053, Alnarp, Sweden.	click here	click here	click here	click here	journal
29208717	10.1073/pnas.1710597114	Efficient targeted DNA editing and replacement inChlamydomonas reinhardtiiusing Cpf1 ribonucleoproteins and single-stranded DNA.	The green algaChlamydomonas reinhardtiiis an invaluable reference organism to research fields including algal, plant, and ciliary biology. Accordingly, decades-long standing inefficiencies in targeted nuclear gene editing broadly hinderChlamydomonasresearch. Here we report that single-step codelivery of CRISPR/Cpf1 ribonucleoproteins with single-stranded DNA repair templates results in precise an…	eng	Proceedings of the National Academy of Sciences of the United States of America	Proc Natl Acad Sci U S A	7505876	2017	Dec		114	51	13567-13572	Internet	Aron Ferenczi	Ferenczi, A; Pyott, DE; Xipnitou, A; Molnar, A	Institute of Molecular Plant Sciences, University of Edinburgh, Edinburgh EH9 3BF, United Kingdom.	click here	click here	click here	click here	journal
28174584	10.3389/fpls.2017.00039	An Efficient Visual Screen for CRISPR/Cas9 Activity inArabidopsis thaliana.	The CRISPR/Cas9 system enables precision editing of the genome of the model plantArabidopsis thalianaand likely of any other organism. Tools and methods for further developing and optimizing this widespread and versatile system inArabidopsiswould hence be welcomed. Here, we designed a generic vector system that can be used to clone any sgRNA sequence in a plant T-DNA vector containing an ubiquito…	eng	Frontiers in plant science	Front Plant Sci	101568200	2017			8		39	Print	Florian Hahn	Hahn, F; Mantegazza, O; Greiner, A; Hegemann, P; Eisenhut, M; Weber, AP	Institute of Plant Biochemistry, Cluster of Excellence on Plant Science, Center for Synthetic Life Sciences, Heinrich Heine University Düsseldorf, Germany.	click here	click here	click here	click here	journal
28207183	10.1111/febs.14042	Combining the auxin-inducible degradation system with CRISPR/Cas9-based genome editing for the conditional depletion of endogenous Drosophila melanogaster proteins.	Inducible protein degradation techniques have considerable advantages over classical genetic approaches, which generate loss-of-function phenotypes at the gene or mRNA level. The plant-derived auxin-inducible degradation system (AID) is a promising technique which enables the degradation of target proteins tagged with the AID motif in nonplant cells. Here, we present a detailed characterization o…	eng	The FEBS journal	FEBS J	101229646	2017	04		284	7	1056-1069	Internet	Melinda Bence	Bence, M; Jankovics, F; Lukácsovich, T; Erdélyi, M	Institute of Genetics, Biological Research Centre of the Hungarian Academy of Sciences, Szeged, Hungary.	click here	click here	click here	click here	journal
28432338	10.1038/s41598-017-01050-6	Crispr/Cas9 Mediated Inactivation of Argonaute 2 Reveals its Differential Involvement in Antiviral Responses.	RNA silencing constitutes an important antiviral mechanism in plants. Small RNA guided Argonaute proteins fulfill essential role in this process by acting as executors of viral restriction. Plants encode multiple Argonaute proteins of which several exhibit antiviral activities. A recent addition to this group is AGO2. Its involvement in antiviral responses is established predominantly by studies …	eng	Scientific reports	Sci Rep	101563288	2017	Apr		7	1	1010	Internet	Márta Ludman	Ludman, M; Burgyán, J; Fátyol, K	Agricultural Biotechnology Institute, National Agricultural Research and Innovation Centre, Szent-Györgyi Albert u. 4, Gödöllő, 2100, Hungary.	click here	click here	click here	click here	journal
28523445	10.1007/s00299-017-2151-y	PtrMYB57 contributes to the negative regulation of anthocyanin and proanthocyanidin biosynthesis in poplar.	A novel R2R3 MYB transcription factor PtrMYB57 interacted with bHLH131 and PtrTTG1 to form the MBW complex and negatively regulated the biosynthesis of both anthocyanins and PAs in poplar. R2R3-MYB transcription factors (TFs) are important regulators of secondary metabolite biosynthesis in woody species. A series of R2R3-MYB TFs involved in anthocyanin and proanthocyanidin (PA) biosynthesis have …	eng	Plant cell reports	Plant Cell Rep	9880970	2017	Aug		36	8	1263-1276	Internet	Shuzhen Wan	Wan, S; Li, C; Ma, X; Luo, K	Key Laboratory of Adaptation and Evolution of Plateau Biota, Northwest Institute of Plateau Biology, Chinese Academy of Sciences, Xining, 810008, China.	click here	click here	click here	click here	journal
29061908	10.1104/pp.17.01265	The RNA Editing Factor SlORRM4 Is Required for Normal Fruit Ripening in Tomato.	RNA editing plays a key posttranscriptional role in gene expression. Existing studies on cytidine-to-uridine RNA editing in plants have focused on maize (Zea mays), rice (Oryza sativa), and Arabidopsis (Arabidopsis thaliana). However, the importance and regulation of RNA editing in several critical agronomic processes are not well understood, a notable example of which is fruit ripening. Here, we…	eng	Plant physiology	Plant Physiol	0401224	2017	Dec		175	4	1690-1702	Internet	Yongfang Yang	Yang, Y; Zhu, G; Li, R; Yan, S; Fu, D; Zhu, B; Tian, H; Luo, Y; Zhu, H	College of Food Science and Nutritional Engineering, China Agricultural University, Beijing 100083, China.	click here	click here	click here	click here	journal
28549739	10.1016/j.resmic.2017.05.002	Characterization of a major facilitator superfamily transporter in Shiraia bambusicola.	Reactive oxygen species (ROS) generated by photo-activated hypocrellin from Shiraia bambusicola are detrimental to cellular macromolecules. However, S. bambusicola can still maintain excellent morphology during continuous hypocrellin production, indicating an extraordinary autoresistance system that protects against the harmful ROS. In this study, a major facilitator superfamily transporter (MFS)…	eng	Research in microbiology	Res Microbiol	8907468	2017	Sep		168	7	664-672	Internet	Huaxiang Deng	Deng, H; Gao, R; Liao, X; Cai, Y	The Key Laboratory of Industrial Biotechnology, Ministry of Education, School of Biotechnology, Jiangnan University, 1800 Lihu Road, Wuxi, Jiangsu 214122, People's Republic of China.	click here	click here	click here	click here	journal
29259295	10.1038/s41598-017-18251-8	CRISPR/Cas9-based knockouts reveal that CpRLP1 is a negative regulator of the sex pheromone PR-IP in the Closterium peracerosum-strigosum-littorale complex.	Heterothallic strains of the Closterium peracerosum-strigosum-littorale (C. psl.) complex have two sexes, mating-type plus (mt+) and mating-type minus (mt-). Conjugation between these two sexes is regulated by two sex pheromones, protoplast-release-inducing protein (PR-IP) and PR-IP Inducer, which are produced by mt+and mt-cells, respectively. PR-IP mediates the release of protoplasts from mt-cel…	eng	Scientific reports	Sci Rep	101563288	2017	Dec		7	1	17873	Internet	Naho Kanda	Kanda, N; Ichikawa, M; Ono, A; Toyoda, A; Fujiyama, A; Abe, J; Tsuchikane, Y; Nishiyama, T; Sekimoto, H	Graduate School of Science, Japan Women's University, 2-8-1 Mejirodai, Bunkyo-ku, Tokyo, 112-8681, Japan.	click here	click here	click here	click here	journal
28444797	10.1111/nph.14569	The transcription factor MYB115 contributes to the regulation of proanthocyanidin biosynthesis and enhances fungal resistance in poplar.	Proanthocyanidins (PAs) are major defense phenolic compounds in the leaves of poplar (Populus spp.) in response to abiotic and biotic stresses. Transcriptional regulation of PA biosynthetic genes by the MYB-basic helix-loop-helix (bHLH)-WD40 complexes in poplar is not still fully understood. Here, an Arabidopsis TT2-like gene MYB115 was isolated from Populus tomentosa and characterized by various…	eng	The New phytologist	New Phytol	9882884	2017	Jul		215	1	351-367	Internet	Lijun Wang	Wang, L; Ran, L; Hou, Y; Tian, Q; Li, C; Liu, R; Fan, D; Luo, K	Key Laboratory of Eco-environments of Three Gorges Reservoir Region, Ministry of Education, Institute of Resources Botany, School of Life Sciences, Southwest University, Chongqing, 400715, China.	click here	click here	click here	click here	journal
29235474	10.1038/s41467-017-02265-x	Engineering cell signaling using tunable CRISPR-Cpf1-based transcription factors.	The catalytically dead Cpf1 endonuclease from Acidaminococcus sp. BV3L6 (dAsCpf1) has been used to construct effective transcriptional repressors in bacteria and plants. However, it is still unclear if dAsCpf1 can function in human cells as a transcriptional regulator or a signal conductor. Here, we repurpose the dAsCpf1 system in human cells for a variety of functions, including the activation o…	eng	Nature communications	Nat Commun	101528555	2017	Dec		8	1	2095	Internet	Yuchen Liu	Liu, Y; Han, J; Chen, Z; Wu, H; Dong, H; Nie, G	Institute of Translational Medicine, Shenzhen Second People's Hospital, The First Affiliated Hospital of Shenzhen University, Shenzhen, 518039, China.	click here	click here	click here	click here	journal
28475612	10.1371/journal.ppat.1006379	Calmodulin-like proteins localized to the conoid regulate motility and cell invasion by Toxoplasma gondii.	Toxoplasma gondii contains an expanded number of calmodulin (CaM)-like proteins whose functions are poorly understood. Using a combination of CRISPR/Cas9-mediated gene editing and a plant-like auxin-induced degron (AID) system, we examined the roles of three apically localized CaMs. CaM1 and CaM2 were individually dispensable, but loss of both resulted in a synthetic lethal phenotype. CaM3 was re…	eng	PLoS pathogens	PLoS Pathog	101238921	2017	May		13	5	e1006379	Internet	Shaojun Long	Long, S; Brown, KM; Drewry, LL; Anthony, B; Phan, IQH; Sibley, LD	Department of Molecular Microbiology, Washington University School of Medicine, St. Louis. Missouri, United States of America.	click here	click here	click here	click here	journal
28838125	10.1093/pcp/pcx063	HOTHEAD-Like HTH1 is Involved in Anther Cutin Biosynthesis and is Required for Pollen Fertility in Rice.	The cuticle covering the outer surface of anthers is essential for male reproductive development in plants. However, the mechanism underlying the synthesis of these lipidic polymers remains unclear. HOTHEAD (HTH) in Arabidopsis thaliana is a presumptive glucose-methanol-choline (GMC) oxidoreductase involved in the biosynthesis of long-chain α-,ω-dicarboxylic fatty acids. In this study, we charact…	eng	Plant & cell physiology	Plant Cell Physiol	9430925	2017	Jul		58	7	1238-1248	Internet	Ya Xu	Xu, Y; Liu, S; Liu, Y; Ling, S; Chen, C; Yao, J	College of Life Science and Technology, Huazhong Agricultural University, Wuhan 430070, China.	click here	click here	click here	click here	journal
28936222	10.3389/fpls.2017.01548	The SoybeanRfg1Gene Restricts Nodulation bySinorhizobium frediiUSDA193.	Sinorhizobium fredii is a fast-growing rhizobial species that can establish a nitrogen-fixing symbiosis with a wide range of legume species including soybeans (Glycine max). In soybeans, this interaction shows a high level of specificity such that particularS. frediistrains nodulate only a limited set of plant genotypes. Here we report the identification of a dominant gene in soybeans that restri…	eng	Frontiers in plant science	Front Plant Sci	101568200	2017			8		1548	Print	Yinglun Fan	Fan, Y; Liu, J; Lyu, S; Wang, Q; Yang, S; Zhu, H	College of Agriculture, Liaocheng UniversityLiaocheng, China.	click here	click here	click here	click here	journal
28338870	10.1093/jxb/erx026	StMYB44 negatively regulates phosphate transport by suppressing expression of PHOSPHATE1 in potato.	Phosphorus is an important macronutrient for plant growth, but often deficient in soil. To understand the molecular basis of the complex responses of potato (Solanum tuberosum L.) to phosphate (Pi) deficiency stress, the RNA-Seq approach was taken to identify genes responding to Pi starvation in potato roots. A total of 359 differentially expressed genes were identified, among which the Solanum t…	eng	Journal of experimental botany	J Exp Bot	9882906	2017	02		68	5	1265-1281	Internet	Xiangjun Zhou	Zhou, X; Zha, M; Huang, J; Li, L; Imran, M; Zhang, C	Department of Agronomy, Purdue University, West Lafayette IN 47907, USA.	click here	click here	click here	click here	journal
29021797	10.3389/fpls.2017.01639	The Rice AAA-ATPase OsFIGNL1 Is Essential for Male Meiosis.	Meiosis is crucial in reproduction of plants and ensuring genetic diversity. Although several genes involved in homologous recombination and DNA repair have been reported, their functions in rice (Oryza sativa) male meiosis remain poorly understood. Here, we isolated and characterized the riceOsFIGNL1(OsFidgetin-like 1) gene, encoding a conserved AAA-ATPase, and explored its function and importan…	eng	Frontiers in plant science	Front Plant Sci	101568200	2017			8		1639	Print	Peipei Zhang	Zhang, P; Zhang, Y; Sun, L; Sinumporn, S; Yang, Z; Sun, B; Xuan, D; Li, Z; Yu, P; Wu, W; Wang, K; Cao, L; Cheng, S	Key Laboratory for Zhejiang Super Rice Research and State Key Laboratory of Rice Biology, China National Rice Research Institute, Hangzhou, China.	click here	click here	click here	click here	journal
28216107	10.1016/j.ymben.2017.02.007	An endoplasmic reticulum-engineered yeast platform for overproduction of triterpenoids.	Saponins are a structurally diverse family of triterpenes that are widely found as main constituents in many traditional plant-based medicines and often have bioactivities of industrial interest. The heterologous production of triterpene saponins in microbes remains challenging and only limited successful pathway engineering endeavors have been reported. To improve the production capacities of a …	eng	Metabolic engineering	Metab Eng	9815657	2017	03		40		165-175	Internet	Philipp Arendt	Arendt, P; Miettinen, K; Pollier, J; De Rycke, R; Callewaert, N; Goossens, A	Department of Plant Biotechnology and Bioinformatics, Ghent University, 9052 Ghent, Belgium; Center for Plant Systems Biology, VIB, 9052 Ghent, Belgium; Laboratory for Protein Biochemistry and Biomolecular Engineering, Department of Biochemistry and Microbiology, Ghent University, B-9000 Ghent, Belgium; VIB Medical Biotechnology Center, B-9000 Ghent, Belgium.	click here	click here	click here	click here	journal
29282604	10.1186/s12284-017-0191-0	OsLAP6/OsPKS1, an orthologue of Arabidopsis PKSA/LAP6, is critical for proper pollen exine formation.	Male fertility is crucial for rice yield, and the improvement of rice yield requires hybrid production that depends on male sterile lines. Although recent studies have revealed several important genes in male reproductive development, our understanding of the mechanisms of rice pollen development remains unclear.We identified a rice mutant oslap6 with complete male sterile phenotype caused by def…	eng	Rice (New York, N.Y.)	Rice (N Y)	101503136	2017	Dec		10	1	53	Print	Ting Zou	Zou, T; Xiao, Q; Li, W; Luo, T; Yuan, G; He, Z; Liu, M; Li, Q; Xu, P; Zhu, J; Liang, Y; Deng, Q; Wang, S; Zheng, A; Wang, L; Li, P; Li, S	State Key Laboratory of Hybrid Rice, Rice Research Institute, Sichuan Agricultural University, Chengdu, 611130, China.	click here	click here	click here	click here	journal
29270190	10.3389/fpls.2017.02095	AT2G21280 Only Has a Minor Role in Chloroplast Division.	Chloroplast division is an important cellular process, which involves complicated coordination of multiple proteins. In mutant plants with chloroplast division defects, chloroplasts are usually found to be with enlarged size and reduced numbers. Previous studies have shown thatAT2G21280, which was named asGC1(GIANT CHLOROPLAST 1) orAtSulA, was an important chloroplast division gene, because eithe…	eng	Frontiers in plant science	Front Plant Sci	101568200	2017			8		2095	Print	Yiqiong Li	Li, Y; Wang, L; Wang, G; Feng, Y; Liu, X	College of Biological Sciences and Biotechnology, Beijing Forestry University, Beijing, China.	click here	click here	click here	click here	journal
29312424	10.3389/fpls.2017.02197	OsPT4 Contributes to Arsenate Uptake and Transport in Rice.	Arsenic (As) is toxic to organisms, and elevated As accumulation in rice (Oryza sativa) grain may pose a significant health risk to humans. The predominant form of As in soil under aerobic conditions is As(V), which has a chemical structure similar to that of PO43-. Rice roots take up As(V) by phosphate (Pi) transporters, such as OsPT1 and OsPT8. In the present study, we investigated the contribu…	eng	Frontiers in plant science	Front Plant Sci	101568200	2017			8		2197	Print	Ying Ye	Ye, Y; Li, P; Xu, T; Zeng, L; Cheng, D; Yang, M; Luo, J; Lian, X	National Key Laboratory of Crop Genetic Improvement and National Center of Plant Gene Research, Huazhong Agricultural University, Wuhan, China.	click here	click here	click here	click here	journal
28796837	10.1371/journal.pone.0183005	Whole genome sequence of two Rathayibacter toxicus strains reveals a tunicamycin biosynthetic cluster similar to Streptomyces chartreusis.	Rathayibacter toxicus is a forage grass associated Gram-positive bacterium of major concern to food safety and agriculture. This species is listed by USDA-APHIS as a plant pathogen select agent because it produces a tunicamycin-like toxin that is lethal to livestock and may be vectored by nematode species native to the U.S. The complete genomes of two strains of R. toxicus, including the type str…	eng	PloS one	PLoS One	101285081	2017			12	8	e0183005	Internet	Aaron J Sechler	Sechler, AJ; Tancos, MA; Schneider, DJ; King, JG; Fennessey, CM; Schroeder, BK; Murray, TD; Luster, DG; Schneider, WL; Rogers, EE	Foreign Disease/Weed Science Research Unit, Agricultural Research Service, U.S. Dept. of Agriculture, Frederick, Maryland, United States of America.	click here	click here	click here	click here	journal
27633468	10.1111/imj.13183	Gene editing advance re-ignites debate on the merits and risks of animal to human transplantation.	In Australia, and internationally, the shortage of organ and tissue donors significantly limits the number of patients with critical organ or tissue failure who are able to receive a transplant each year. The rationale for xenotransplantation - the transplantation of living cells, tissues or organs from one species to another - is to meet this shortfall in human donor material. While early clinic…	eng	Internal medicine journal	Intern Med J	101092952	2016	Sep		46	9	1017-22	Internet	R K F Fung	Fung, RK; Kerridge, IH	Centre for Values, Ethics and the Law in Medicine, School of Public Health, Sydney Medical School, The University of Sydney, Sydney, New South Wales, Australia. rfun6468@uni.sydney.edu.au.	click here	click here	click here	click here	journal
27510266	10.1038/srep31460	Efficient liver repopulation of transplanted hepatocyte prevents cirrhosis in a rat model of hereditary tyrosinemia type I.	Hereditary tyrosinemia type I (HT1) is caused by a deficiency in the enzyme fumarylacetoacetate hydrolase (Fah). Fah-deficient mice and pigs are phenotypically analogous to human HT1, but do not recapitulate all the chronic features of the human disorder, especially liver fibrosis and cirrhosis. Rats as an important model organism for biomedical research have many advantages over other animal mod…	eng	Scientific reports	Sci Rep	101563288	2016	Aug		6		31460	Internet	Ludi Zhang	Zhang, L; Shao, Y; Li, L; Tian, F; Cen, J; Chen, X; Hu, D; Zhou, Y; Xie, W; Zheng, Y; Ji, Y; Liu, M; Li, D; Hui, L	State Key Laboratory of Cell Biology, Shanghai Institute of Biochemistry and Cell Biology, Shanghai Institutes for Biological Sciences, Chinese Academic of Sciences, Shanghai, China.	click here	click here	click here	click here	journal
26595768	10.1038/ng.3449	The primate-specific noncoding RNA HPAT5 regulates pluripotency during human preimplantation development and nuclear reprogramming.	Long intergenic noncoding RNAs (lincRNAs) are derived from thousands of loci in mammalian genomes and are frequently enriched in transposable elements (TEs). Although families of TE-derived lincRNAs have recently been implicated in the regulation of pluripotency, little is known of the specific functions of individual family members. Here we characterize three new individual TE-derived human linc…	eng	Nature genetics	Nat Genet	9216904	2016	Jan		48	1	44-52	Internet	Jens Durruthy-Durruthy	Durruthy-Durruthy, J; Sebastiano, V; Wossidlo, M; Cepeda, D; Cui, J; Grow, EJ; Davila, J; Mall, M; Wong, WH; Wysocka, J; Au, KF; Reijo Pera, RA	Institute for Stem Cell Biology and Regenerative Medicine, Stanford University, Stanford, California, USA.	click here	click here	click here	click here	journal
27151309	10.1016/j.addr.2016.04.027	Stem cell-based therapies for HIV/AIDS.	One of the current focuses in HIV/AIDS research is to develop a novel therapeutic strategy that can provide a life-long remission of HIV/AIDS without daily drug treatment and, ultimately, a cure for HIV/AIDS. Hematopoietic stem cell-based anti-HIV gene therapy aims to reconstitute the patient immune system by transplantation of genetically engineered hematopoietic stem cells with anti-HIV genes. …	eng	Advanced drug delivery reviews	Adv Drug Deliv Rev	8710523	2016	Aug		103		187-201	Internet	Olivier Pernet	Pernet, O; Yadav, SS; An, DS	School of Nursing, University of California Los Angeles, 188 BSRB, 615 Charles E. Young Dr. South, Los Angeles, CA 90095, USA; UCLA AIDS Institute, 188 BSRB, 615 Charles E. Young Dr. South, Los Angeles, CA 90095, USA. Electronic address: opernet@ucla.edu.	click here	click here	click here	click here	journal
27256364	10.1007/s00439-016-1691-5	Gene correction in patient-specific iPSCs for therapy development and disease modeling.	The discovery that mature cells can be reprogrammed to become pluripotent and the development of engineered endonucleases for enhancing genome editing are two of the most exciting and impactful technology advances in modern medicine and science. Human pluripotent stem cells have the potential to establish new model systems for studying human developmental biology and disease mechanisms. Gene corr…	eng	Human genetics	Hum Genet	7613873	2016	09		135	9	1041-58	Internet	Yoon-Young Jang	Jang, YY; Ye, Z	Department of Oncology and Institute for Cell Engineering, Johns Hopkins University School of Medicine, Baltimore, MD, USA.	click here	click here	click here	click here	journal
27050479	10.1038/srep23980	Targeted mutagenesis in chicken using CRISPR/Cas9 system.	The CRISPR/Cas9 system is a simple and powerful tool for genome editing in various organisms including livestock animals. However, the system has not been applied to poultry because of the difficulty in accessing their zygotes. Here we report the implementation of CRISPR/Cas9-mediated gene targeting in chickens. Two egg white genes, ovalbumin and ovomucoid, were efficiently (>90%) mutagenized in …	eng	Scientific reports	Sci Rep	101563288	2016	Apr		6		23980	Internet	Isao Oishi	Oishi, I; Yoshii, K; Miyahara, D; Kagami, H; Tagami, T	Biomedical Research Institute, National Institute of Advanced Industrial Science and Technology, 1-8-31, Midorioka, Ikeda, Osaka 563-8577, Japan.	click here	click here	click here	click here	journal
26592087	10.1021/acssynbio.5b00196	In-Yeast Engineering of a Bacterial Genome Using CRISPR/Cas9.	One remarkable achievement in synthetic biology was the reconstruction of mycoplasma genomes and their cloning in yeast where they can be modified using available genetic tools. Recently, CRISPR/Cas9 editing tools were developed for yeast mutagenesis. Here, we report their adaptation for the engineering of bacterial genomes cloned in yeast. A seamless deletion of the mycoplasma glycerol-3-phospha…	eng	ACS synthetic biology	ACS Synth Biol	101575075	2016	Jan		5	1	104-9	Internet	Iason Tsarmpopoulos	Tsarmpopoulos, I; Gourgues, G; Blanchard, A; Vashee, S; Jores, J; Lartigue, C; Sirand-Pugnet, P	The J. Craig Venter Institute , 9704 Medical Center Drive, Rockville, 20850 Maryland United States .	click here	click here	click here	click here	journal
27610605	10.1111/xen.12258	Efficient production of biallelic GGTA1 knockout pigs by cytoplasmic microinjection of CRISPR/Cas9 into zygotes.	Xenotransplantation is considered to be a promising solution to the growing demand for suitable donor organs for transplantation. Despite tremendous progress in the generation of pigs with multiple genetic modifications thought to be necessary to overcoming the severe rejection responses after pig-to-non-human primate xenotransplantation, the production of knockout pigs by somatic cell nuclear tr…	eng	Xenotransplantation	Xenotransplantation	9438793	2016	09		23	5	338-46	Internet	Bjoern Petersen	Petersen, B; Frenzel, A; Lucas-Hahn, A; Herrmann, D; Hassel, P; Klein, S; Ziegler, M; Hadeler, KG; Niemann, H	Institute of Farm Animal Genetics, Friedrich-Loeffler-Institut, Mariensee, Neustadt, Germany. bjoern.petersen@fli.bund.de.	click here	click here	click here	click here	journal
27573176	10.1038/cr.2016.101	Genome editing with CRISPR/Cas9 in postnatal mice corrects PRKAG2 cardiac syndrome.	PRKAG2 cardiac syndrome is an autosomal dominant inherited disease resulted from mutations in the PRKAG2 gene that encodes γ2 regulatory subunit of AMP-activated protein kinase. Affected patients usually develop ventricular tachyarrhythmia and experience progressive heart failure that is refractory to medical treatment and requires cardiac transplantation. In this study, we identify a H530R mutat…	eng	Cell research	Cell Res	9425763	2016	Oct		26	10	1099-1111	Internet	Chang Xie	Xie, C; Zhang, YP; Song, L; Luo, J; Qi, W; Hu, J; Lu, D; Yang, Z; Zhang, J; Xiao, J; Zhou, B; Du, JL; Jing, N; Liu, Y; Wang, Y; Li, BL; Song, BL; Yan, Y	Hubei Key Laboratory of Cell Homeostasis, College of Life Sciences, Wuhan University, Wuhan 430072, China.	click here	click here	click here	click here	journal
27572891	10.1038/ncomms12642	Reprogramming metabolic pathways in vivo with CRISPR/Cas9 genome editing to treat hereditary tyrosinaemia.	Many metabolic liver disorders are refractory to drug therapy and require orthotopic liver transplantation. Here we demonstrate a new strategy, which we call metabolic pathway reprogramming, to treat hereditary tyrosinaemia type I in mice; rather than edit the disease-causing gene, we delete a gene in a disease-associated pathway to render the phenotype benign. Using CRISPR/Cas9 in vivo, we conve…	eng	Nature communications	Nat Commun	101528555	2016	Aug		7		12642	Internet	Francis P Pankowicz	Pankowicz, FP; Barzi, M; Legras, X; Hubert, L; Mi, T; Tomolonis, JA; Ravishankar, M; Sun, Q; Yang, D; Borowiak, M; Sumazin, P; Elsea, SH; Bissig-Choisat, B; Bissig, KD	Center for Cell and Gene Therapy, Baylor College of Medicine, Houston, Texas 77030, USA.	click here	click here	click here	click here	journal
27489041	10.1038/srep30714	One step engineering of the small-subunit ribosomal RNA using CRISPR/Cas9.	Bacteria are indispensable for the study of fundamental molecular biology processes due to their relatively simple gene and genome architecture. The ability to engineer bacterial chromosomes is quintessential for understanding gene functions. Here we demonstrate the engineering of the small-ribosomal subunit (16S) RNA of Mycoplasma mycoides, by combining the CRISPR/Cas9 system and the yeast recom…	eng	Scientific reports	Sci Rep	101563288	2016	Aug		6		30714	Internet	Krishna Kannan	Kannan, K; Tsvetanova, B; Chuang, RY; Noskov, VN; Assad-Garcia, N; Ma, L; Hutchison Iii, CA; Smith, HO; Glass, JI; Merryman, C; Venter, JC; Gibson, DG	Synthetic Genomics, Inc., La Jolla, CA 92037, USA.	click here	click here	click here	click here	journal
27898091	10.1038/mtna.2016.98	Restoring Ureagenesis in Hepatocytes by CRISPR/Cas9-mediated Genomic Addition to Arginase-deficient Induced Pluripotent Stem Cells.	Urea cycle disorders are incurable enzymopathies that affect nitrogen metabolism and typically lead to hyperammonemia. Arginase deficiency results from a mutation in Arg1, the enzyme regulating the final step of ureagenesis and typically results in developmental disabilities, seizures, spastic diplegia, and sometimes death. Current medical treatments for urea cycle disorders are only marginally e…	eng	Molecular therapy. Nucleic acids	Mol Ther Nucleic Acids	101581621	2016	Nov		5	11	e394	Print	Patrick C Lee	Lee, PC; Truong, B; Vega-Crespo, A; Gilmore, WB; Hermann, K; Angarita, SA; Tang, JK; Chang, KM; Wininger, AE; Lam, AK; Schoenberg, BE; Cederbaum, SD; Pyle, AD; Byrne, JA; Lipshutz, GS	Department of Molecular and Medical Pharmacology, David Geffen School of Medicine at UCLA, Los Angeles, California, USA.	click here	click here	click here	click here	journal
27601644	10.1073/pnas.1612075113	Genome editing using CRISPR-Cas9 to create the HPFH genotype in HSPCs: An approach for treating sickle cell disease and β-thalassemia.	Hereditary persistence of fetal hemoglobin (HPFH) is a condition in some individuals who have a high level of fetal hemoglobin throughout life. Individuals with compound heterozygous β-thalassemia or sickle cell disease (SCD) and HPFH have milder clinical manifestations. Using RNA-guided clustered regularly interspaced short palindromic repeats-associated Cas9 (CRISPR-Cas9) genome-editing technol…	eng	Proceedings of the National Academy of Sciences of the United States of America	Proc Natl Acad Sci U S A	7505876	2016	09		113	38	10661-5	Internet	Lin Ye	Ye, L; Wang, J; Tan, Y; Beyer, AI; Xie, F; Muench, MO; Kan, YW	Department of Medicine, University of California, San Francisco, CA 94143; Institute for Human Genetics, University of California, San Francisco, CA 94143; yw.kan@ucsf.edu lin.ye@ucsf.edu.	click here	click here	click here	click here	journal
27013738	10.5966/sctm.2015-0252	Genetic Correction of Induced Pluripotent Stem Cells From a Deaf Patient With MYO7A Mutation Results in Morphologic and Functional Recovery of the Derived Hair Cell-Like Cells.	The genetic correction of induced pluripotent stem cells (iPSCs) induced from somatic cells of patients with sensorineural hearing loss (caused by hereditary factors) is a promising method for its treatment. The correction of gene mutations in iPSCs could restore the normal function of cells and provide a rich source of cells for transplantation. In the present study, iPSCs were generated from a …	eng	Stem cells translational medicine	Stem Cells Transl Med	101578022	2016	May		5	5	561-71	Print	Zi-Hua Tang	Tang, ZH; Chen, JR; Zheng, J; Shi, HS; Ding, J; Qian, XD; Zhang, C; Chen, JL; Wang, CC; Li, L; Chen, JZ; Yin, SK; Huang, TS; Chen, P; Guan, MX; Wang, JF	Institute of Cell and Development, College of Life Sciences, Zhejiang University, Hangzhou, Zhejiang, People's Republic of China.	click here	click here	click here	click here	journal
27545506	10.1016/j.stem.2016.05.024	Enhancing a Wnt-Telomere Feedback Loop Restores Intestinal Stem Cell Function in a Human Organotypic Model of Dyskeratosis Congenita.	Patients with dyskeratosis congenita (DC) suffer from stem cell failure in highly proliferative tissues, including the intestinal epithelium. Few therapeutic options exist for this disorder, and patients are treated primarily with bone marrow transplantation to restore hematopoietic function. Here, we generate isogenic DC patient and disease allele-corrected intestinal tissue using clustered regu…	eng	Cell stem cell	Cell Stem Cell	101311472	2016	09		19	3	397-405	Internet	Dong-Hun Woo	Woo, DH; Chen, Q; Yang, TL; Glineburg, MR; Hoge, C; Leu, NA; Johnson, FB; Lengner, CJ	Department of Biomedical Sciences, School of Veterinary Medicine, University of Pennsylvania, Philadelphia, PA 19104, USA.	click here	click here	click here	click here	journal
26937964	10.1371/journal.pone.0150809	In Vivo Deletion of the Cebpa +37 kb Enhancer Markedly Reduces Cebpa mRNA in Myeloid Progenitors but Not in Non-Hematopoietic Tissues to Impair Granulopoiesis.	The murine Cebpa gene contains a +37 kb, evolutionarily conserved 440 bp enhancer that directs high-level expression to myeloid progenitors in transgenic mice. The enhancer is bound and activated by Runx1, Scl, GATA2, C/EBPα, c-Myb, Pu.1, and additional Ets factors in myeloid cells. CRISPR/Cas9-mediated replacement of the wild-type enhancer with a variant mutant in its seven Ets sites leads to 20…	eng	PloS one	PLoS One	101285081	2016			11	3	e0150809	Internet	Hong Guo	Guo, H; Cooper, S; Friedman, AD	Division of Pediatric Oncology, Johns Hopkins University School of Medicine, Baltimore, Maryland, United States of America.	click here	click here	click here	click here	journal
27644742	10.16288/j.yczz.16-134	Application of CRISPR/Cas9 system in breeding of new antiviral plant germplasm.	With the development and improvement of CRISPR/Cas9 system in genomic editing technology, the system has been applied to the prevention and control of animal viral infectious diseases, which has made considerable achievements. It has also been applied to the study of highly efficient gene targeting editing in plant virus genomes. The CRISPR/Cas9-mediated targeted gene modification has not only ac…	eng	Yi chuan = Hereditas	Yi Chuan	9436478	2016	09		38	9	811-20	Print	Dao-wei Zhang	Zhang, DW; Zhang, CF; Dong, F; Huang, YL; Zhang, Y; Zhou, H	Hunan Crop Research Institute, Changsha 410125, China.	click here	click here	click here	click here	journal
26823677	10.1186/s13007-016-0103-0	Revolutionizing plant biology: multiple ways of genome engineering by CRISPR/Cas.	The precise manipulation of plant genomes relies on the induction of DNA double-strand breaks by site-specific nucleases to initiate DNA repair reactions that are either based on non-homologous end joining (NHEJ) or homologous recombination (HR). Recently, the CRISPR/Cas system emerged as the most important tool for genome engineering due to its simple structure and its applicability to a wide ra…	eng	Plant methods	Plant Methods	101245798	2016			12		8	Print	Simon Schiml	Schiml, S; Puchta, H	Botanical Institute II, Karlsruhe Institute of Technology, POB 6980, 76049 Karlsruhe, Germany.	click here	click here	click here	click here	journal
27084537	10.1007/s00299-016-1981-3	Homology-based double-strand break-induced genome engineering in plants.	This review summarises the recent progress in DSB-induced gene targeting by homologous recombination in plants. We are getting closer to efficiently inserting genes or precisely exchanging single amino acids. Although the basic features of double-strand break (DSB)-induced genome engineering were established more than 20 years ago, only in recent years has the technique come into the focus of pla…	eng	Plant cell reports	Plant Cell Rep	9880970	2016	Jul		35	7	1429-38	Internet	Jeannette Steinert	Steinert, J; Schiml, S; Puchta, H	Botanical Institute II, Karlsruhe Institute of Technology, POB 6980, 76049, Karlsruhe, Germany.	click here	click here	click here	click here	journal
27025856	10.1007/s00299-016-1975-1	Progress of targeted genome modification approaches in higher plants.	Transgene integration in plants is based on illegitimate recombination between non-homologous sequences. The low control of integration site and number of (trans/cis)gene copies might have negative consequences on the expression of transferred genes and their insertion within endogenous coding sequences. The first experiments conducted to use precise homologous recombination for gene integration …	eng	Plant cell reports	Plant Cell Rep	9880970	2016	Jul		35	7	1401-16	Internet	Teodoro Cardi	Cardi, T; Neal Stewart, C	Consiglio per la Ricerca in Agricoltura e l'Analisi dell'Economia Agraria (CREA), Centro di Ricerca per l'Orticoltura, Via Cavalleggeri 25, 84098, Pontecagnano, Italy. teodoro.cardi@crea.gov.it.	click here	click here	click here	click here	journal
27417121	10.1002/bies.201670903	The genome editing revolution: A CRISPR-Cas TALE off-target story.	In the last 10 years, we have witnessed a blooming of targeted genome editing systems and applications. The area was revolutionized by the discovery and characterization of the transcription activator-like effector proteins, which are easier to engineer to target new DNA sequences than the previously available DNA binding templates, zinc fingers and meganucleases. Recently, the area experimented …	eng	BioEssays : news and reviews in molecular, cellular and developmental biology	Bioessays	8510851	2016	07		38 Suppl 1		S4-S13	Internet	Stefano Stella	Stella, S; Montoya, G	Novo Nordisk Foundation Center for Protein Research, Protein Structure and Function Programme, Faculty of Health and Medical Sciences, University of Copenhagen, Copenhagen, Denmark.	click here	click here	click here	click here	journal
26774589	10.1016/j.tibtech.2015.12.001	Essential RNA-Based Technologies and Their Applications in Plant Functional Genomics.	Genome sequencing has not only extended our understanding of the blueprints of many plant species but has also revealed the secrets of coding and non-coding genes. We present here a brief introduction to and personal account of key RNA-based technologies, as well as their development and applications for functional genomics of plant coding and non-coding genes, with a focus on short tandem target…	eng	Trends in biotechnology	Trends Biotechnol	8310903	2016	Feb		34	2	106-123	Internet	Sachin Teotia	Teotia, S; Singh, D; Tang, X; Tang, G	Provincial State Key Laboratory of Wheat and Maize Crop Science, Henan Agricultural University, Zhengzhou 450002, China; School of Biotechnology, Gautam Buddha University, Greater Noida, UP 201312, India; Department of Biological Sciences, Michigan Technological University, Houghton, MI 49931, USA.	click here	click here	click here	click here	journal
27455021	10.3760/cma.j.issn.1003-9406.2016.04.030	[Application of CRISPR-Cas9 genome editing for constructing animal models of human diseases].	The CRISPR-Cas9 system is a new targeted nuclease for genome editing, which can directly introduce modifications at the targeted genomic locus. The system utilizes a short single guide RNA (sgRNA) to direct the endonuclease Cas9 in the genome. Upon targeting, Cas9 can generate DNA double-strand breaks (DSBs). As such DSBs are repaired by non-homologous end joining (NHEJ) or homology directed repa…	chi	Zhonghua yi xue yi chuan xue za zhi = Zhonghua yixue yichuanxue zazhi = Chinese journal of medical genetics	Zhonghua Yi Xue Yi Chuan Xue Za Zhi	9425197	2016	Aug		33	4	559-63	Print	Zhanhui Ou	Ou, Z; Sun, X	Key Laboratory for Major Obstetric Diseases of Guangdong Province, Key Laboratory of Reproduction and Genetics of Guangdong Higher Education Institutes, The Third Affiliated Hospital of Guangzhou Medical University, Guangzhou, Guangdong 510150, China. Email: xiaofangsun@gzhmu.edu.cn.	click here	click here	click here	click here	journal
26945523	10.1002/jcp.25367	Programmable Site-Specific Nucleases for Targeted Genome Engineering in Higher Eukaryotes.	Recent advances in the targeted genome engineering enable molecular biologists to generate sequence specific modifications with greater efficiency and higher specificity in complex eukaryotic genomes. Programmable site-specific DNA cleavage reagents and cellular DNA repair mechanisms have made this possible. These reagents have become powerful tools for delivering a site-specific genomic double-s…	eng	Journal of cellular physiology	J Cell Physiol	0050222	2016	Nov		231	11	2380-92	Internet	Ganesan Govindan	Govindan, G; Ramalingam, S	Department of Biotechnology, Molecular Biology Laboratory, MS Swaminathan Research Foundation, Taramani, Chennai, India.	click here	click here	click here	click here	journal
27725824	10.3389/fpls.2016.01421	Recent Developments in Systems Biology and Metabolic Engineering of Plant-Microbe Interactions.	Microorganisms play a crucial role in the sustainability of the various ecosystems. The characterization of various interactions between microorganisms and other biotic factors is a necessary footstep to understand the association and functions of microbial communities. Among the different microbial interactions in an ecosystem, plant-microbe interaction plays an important role to balance the eco…	eng	Frontiers in plant science	Front Plant Sci	101568200	2016			7		1421	Print	Vishal Kumar	Kumar, V; Baweja, M; Singh, PK; Shukla, P	Enzyme Technology and Protein Bioinformatics Laboratory, Department of Microbiology, Maharshi Dayanand University Rohtak, India.	click here	click here	click here	click here	journal
26839579	10.1186/s13007-016-0101-2	A modular toolbox for gRNA-Cas9 genome engineering in plants based on the GoldenBraid standard.	The efficiency, versatility and multiplexing capacity of RNA-guided genome engineering using the CRISPR/Cas9 technology enables a variety of applications in plants, ranging from gene editing to the construction of transcriptional gene circuits, many of which depend on the technical ability to compose and transfer complex synthetic instructions into the plant cell. The engineering principles of st…	eng	Plant methods	Plant Methods	101245798	2016			12		10	Print	Marta Vazquez-Vilar	Vazquez-Vilar, M; Bernabé-Orts, JM; Fernandez-Del-Carmen, A; Ziarsolo, P; Blanca, J; Granell, A; Orzaez, D	Instituto de Biología Molecular y Celular de Plantas (IBMCP), Consejo Superior de Investigaciones Científicas, Universidad Politécnica de Valencia, Camino de Vera s/n, 46022 Valencia, Spain.	click here	click here	click here	click here	journal
26617267	10.1266/ggs.15-00030	Generation of artificial drooping leaf mutants by CRISPR-Cas9 technology in rice.	CRISPR-Cas9 technology, which uses an RNA-guided nuclease, has been developed as an efficient and versatile genome-editing method to induce mutations in genes of interest. To examine the feasibility of this method in developmental studies of a model monocot, rice (Oryza sativa), we introduced the construct gDL-1, which produced a guide RNA targeting the DROOPING LEAF (DL) gene. DL regulates midri…	eng	Genes & genetic systems	Genes Genet Syst	9607822	2016			90	4	231-5	Internet	Takuyuki Ikeda	Ikeda, T; Tanaka, W; Mikami, M; Endo, M; Hirano, HY	Department of Biological Sciences, Graduate School of Science, The University of Tokyo.	click here	click here	click here	click here	journal
27618611	10.1038/nplants.2016.139	Gene replacements and insertions in rice by intron targeting using CRISPR-Cas9.	Sequence-specific nucleases have been exploited to create targeted gene knockouts in various plants(1), but replacing a fragment and even obtaining gene insertions at specific loci in plant genomes remain a serious challenge. Here, we report efficient intron-mediated site-specific gene replacement and insertion approaches that generate mutations using the non-homologous end joining (NHEJ) pathway…	eng	Nature plants	Nat Plants	101651677	2016	09		2		16139	Internet	Jun Li	Li, J; Meng, X; Zong, Y; Chen, K; Zhang, H; Liu, J; Li, J; Gao, C	State Key Laboratory of Plant Cell and Chromosome Engineering, Institute of Genetics and Developmental Biology, Chinese Academy of Sciences, Beijing, China.	click here	click here	click here	click here	journal
27798848	10.1101/gad.288415.116	Control of inflorescence architecture in tomato by BTB/POZ transcriptional regulators.	Plant productivity depends on inflorescences, flower-bearing shoots that originate from the stem cell populations of shoot meristems. Inflorescence architecture determines flower production, which can vary dramatically both between and within species. In tomato plants, formation of multiflowered inflorescences depends on a precisely timed process of meristem maturation mediated by the transcripti…	eng	Genes & development	Genes Dev	8711660	2016	Sep		30	18	2048-2061	Internet	Cao Xu	Xu, C; Park, SJ; Van Eck, J; Lippman, ZB	Cold Spring Harbor Laboratory, Cold Spring Harbor, New York 11724, USA.	click here	click here	click here	click here	journal
27483984	10.1038/srep30910	Manipulating the Biosynthesis of Bioactive Compound Alkaloids for Next-Generation Metabolic Engineering in Opium Poppy Using CRISPR-Cas 9 Genome Editing Technology.	Clustered regularly interspaced short palindromic repeats (CRISPR)/CRISPR-associated9 (Cas9) endonuclease system is a powerful RNA-guided genome editing tool. CRISPR/Cas9 has been well studied in model plant species for targeted genome editing. However, few studies have been reported on plant species without whole genome sequence information. Currently, no study has been performed to manipulate m…	eng	Scientific reports	Sci Rep	101563288	2016	Aug		6		30910	Internet	Yagiz Alagoz	Alagoz, Y; Gurkok, T; Zhang, B; Unver, T	Department of Biology, Faculty of Science, Çankırı Karatekin University, Çankırı18100, Turkey.	click here	click here	click here	click here	journal
26842991	10.1016/j.jgg.2015.10.006	Efficiency and Inheritance of Targeted Mutagenesis in Maize Using CRISPR-Cas9.	CRISPR/Cas (clustered regularly interspaced short palindromic repeats/CRISPR-associated proteins) is an adaptive immune system in bacteria and archaea to defend against invasion from foreign DNA fragments. Recently, it has been developed as a powerful targeted genome editing tool for a wide variety of species. However, its application in maize has only been tested with transiently expressed somat…	eng	Journal of genetics and genomics = Yi chuan xue bao	J Genet Genomics	101304616	2016	Jan		43	1	25-36	Internet	Jinjie Zhu	Zhu, J; Song, N; Sun, S; Yang, W; Zhao, H; Song, W; Lai, J	State Key Laboratory of Agrobiotechnology and National Maize Improvement Center, Department of Plant Genetics and Breeding, China Agricultural University, Beijing 100193, China.	click here	click here	click here	click here	journal
27576893	10.1038/srep32289	CRISPR/Cas9-mediated efficient targeted mutagenesis in Chardonnay (Vitis vinifera L.).	The type II clustered regularly interspaced short palindromic repeats/CRISPR-associated protein 9 system (CRISPR/Cas9) has been successfully applied to edit target genes in multiple plant species. However, it remains unknown whether this system can be used for genome editing in grape. In this study, we described genome editing and targeted gene mutation in 'Chardonnay' suspension cells and plants…	eng	Scientific reports	Sci Rep	101563288	2016	Aug		6		32289	Internet	Chong Ren	Ren, C; Liu, X; Zhang, Z; Wang, Y; Duan, W; Li, S; Liang, Z	Beijing Key Laboratory of Grape Science and Enology and Key Laboratory of Plant Resource, Institute of Botany, the Chinese Academy of Sciences, Beijing 100093, PR China.	click here	click here	click here	click here	journal
26823675	10.1186/s13007-016-0104-z	Meeting report: GARNet/OpenPlant CRISPR-Cas workshop.	Targeted genome engineering has been described as a "game-changing technology" for fields as diverse as human genetics and plant biotechnology. One technique used for precise gene editing utilises the CRISPR-Cas system and is an effective method for genetic engineering in a wide variety of plants. However, many researchers remain unaware of both the technical challenges that emerge when using thi…	eng	Plant methods	Plant Methods	101245798	2016			12		6	Print	Geraint Parry	Parry, G; Patron, N; Bastow, R; Matthewman, C	GARNet, School of Biosciences, Cardiff University, Cardiff, UK.	click here	click here	click here	click here	journal
27557690	10.1007/978-1-4939-4931-1_9	Targeted Mutagenesis in Rice Using TALENs and the CRISPR/Cas9 System.	Sequence-specific nucleases (SSNs), such as zinc-finger nucleases (ZFNs), transcription activator-like effector nucleases (TALENs), and the clustered regularly interspersed short palindromic repeats (CRISPR)/CRISPR-associated protein 9 nuclease (Cas9) system, are powerful tools for understanding gene function and for developing novel traits in plants. In plant species for which transformation and…	eng	Methods in molecular biology (Clifton, N.J.)	Methods Mol Biol	9214969	2016			1469		123-35	Internet	Masaki Endo	Endo, M; Nishizawa-Yokoi, A; Toki, S	Plant Genome Engineering Research Unit, National Institute of Agrobiological Sciences, 2-1-2 Kannondai, Tsukuba, Ibaraki, 305-8602, Japan.	click here	click here	click here	click here	journal
26870061	10.3389/fpls.2016.00040	Gene Inactivation by CRISPR-Cas9 in Nicotiana tabacum BY-2 Suspension Cells.	Plant suspension cells are interesting hosts for the heterologous production of pharmacological proteins such as antibodies. They have the advantage to facilitate the containment and the application of good manufacturing practices. Furthermore, antibodies can be secreted to the extracellular medium, which makes the purification steps much simpler. However, improvements are still to be made regard…	eng	Frontiers in plant science	Front Plant Sci	101568200	2016			7		40	Print	Sébastien Mercx	Mercx, S; Tollet, J; Magy, B; Navarre, C; Boutry, M	Institut des Sciences de la Vie, Université Catholique de Louvain Louvain-la-Neuve, Belgium.	click here	click here	click here	click here	journal
27236514	10.1007/s10126-016-9708-6	Development of an Efficient Genome Editing Method by CRISPR/Cas9 in a Fish Cell Line.	CRISPR/Cas9 system has been used widely in animals and plants to direct mutagenesis. To date, no such method exists for fish somatic cell lines. We describe an efficient procedure for genome editing in the Chinook salmon Oncorhynchus tshawytscha CHSE. This cell line was genetically modified to firstly overexpress a monomeric form of EGFP (cell line CHSE-E Geneticin resistant) and additionally to …	eng	Marine biotechnology (New York, N.Y.)	Mar Biotechnol (NY)	100892712	2016	Aug		18	4	449-52	Internet	Carola E Dehler	Dehler, CE; Boudinot, P; Martin, SA; Collet, B	Institute of Biological and Environmental Sciences, University of Aberdeen Tillydrone Avenue, Aberdeen, AB24 2TZ, UK.	click here	click here	click here	click here	journal
26825596	10.1007/s00299-016-1937-7	Site-directed mutagenesis in Petunia × hybrida protoplast system using direct delivery of purified recombinant Cas9 ribonucleoproteins.	Site-directed mutagenesis of nitrate reductase genes using direct delivery of purified Cas9 protein preassembled with guide RNA produces mutations efficiently in Petunia × hybrida protoplast system. The clustered, regularly interspaced, short palindromic repeat (CRISPR)-CRISPR associated endonuclease 9 (CRISPR/Cas9) system has been recently announced as a powerful molecular breeding tool for site…	eng	Plant cell reports	Plant Cell Rep	9880970	2016	Jul		35	7	1535-44	Internet	Saminathan Subburaj	Subburaj, S; Chung, SJ; Lee, C; Ryu, SM; Kim, DH; Kim, JS; Bae, S; Lee, GJ	Department of Horticultural Science, Chungnam National University, Daejeon, 305-764, South Korea.	click here	click here	click here	click here	journal
27569599	10.1016/j.ymben.2016.08.006	CRISPR interference-guided balancing of a biosynthetic mevalonate pathway increases terpenoid production.	Methods for simple and efficient regulation of metabolic pathway genes are essential for maximizing product titers and conversion yields, and for minimizing the metabolic burden caused by heterologous expression of multiple genes often in the operon context. Clustered regularly interspaced short palindromic repeats (CRISPR) interference (CRISPRi) is emerging as a promising tool for transcriptiona…	eng	Metabolic engineering	Metab Eng	9815657	2016	11		38		228-240	Internet	Seong Keun Kim	Kim, SK; Han, GH; Seong, W; Kim, H; Kim, SW; Lee, DH; Lee, SG	Synthetic Biology and Bioengineering Research Center, Korea Research Institute of Bioscience and Biotechnology (KRIBB), Daejeon 34141, Republic of Korea; Biosystems and Bioengineering Program, University of Science and Technology (UST), Daejeon 34113, Republic of Korea.	click here	click here	click here	click here	journal
27226319	10.1242/dev.134577	Golgb1 regulates protein glycosylation and is crucial for mammalian palate development.	Cleft palate is a common major birth defect for which currently known causes account for less than 30% of pathology in humans. In this study, we carried out mutagenesis screening in mice to identify new regulators of palatogenesis. Through genetic linkage mapping and whole-exome sequencing, we identified a loss-of-function mutation in the Golgb1 gene that co-segregated with cleft palate in a new …	eng	Development (Cambridge, England)	Development	8701744	2016	07		143	13	2344-55	Internet	Yu Lan	Lan, Y; Zhang, N; Liu, H; Xu, J; Jiang, R	Division of Plastic Surgery, Cincinnati Children's Hospital Medical Center, Cincinnati, OH 45229, USA Division of Developmental Biology, Cincinnati Children's Hospital Medical Center, Cincinnati, OH 45229, USA Yu.Lan@cchmc.org.	click here	click here	click here	click here	journal
27669642	10.1016/j.yexcr.2016.09.015	Mammalian knock out cells reveal prominent roles for atlastin GTPases in ER network morphology.	Atlastins are large, membrane-bound GTPases that participate in the fusion of endoplasmic reticulum (ER) tubules to generate the polygonal ER network in eukaryotes. They also regulate lipid droplet size and inhibit bone morphogenetic protein (BMP) signaling, though mechanisms remain unclear. Humans have three atlastins (ATL1, ATL2, and ATL3), and ATL1 and ATL3 are mutated in autosomal dominant he…	eng	Experimental cell research	Exp Cell Res	0373226	2016	Nov		349	1	32-44	Internet	Guohua Zhao	Zhao, G; Zhu, PP; Renvoisé, B; Maldonado-Báez, L; Park, SH; Blackstone, C	Cell Biology Section, Neurogenetics Branch, National Institute of Neurological Disorders and Stroke, National Institutes of Health, Bethesda, MD 20892-3738, USA.	click here	click here	click here	click here	journal
27622539	10.1371/journal.pone.0162169	Genome-Wide Assessment of Efficiency and Specificity in CRISPR/Cas9 Mediated Multiple Site Targeting in Arabidopsis.	Simultaneous multiplex mutation of large gene families using Cas9 has the potential to revolutionize agriculture and plant sciences. The targeting of multiple genomic sites at once raises concerns about the efficiency and specificity in targeting. The model Arabidopsis thaliana is widely used in basic plant research. Previous work has suggested that the Cas9 off-target rate in Arabidopsis is unde…	eng	PloS one	PLoS One	101285081	2016			11	9	e0162169	Internet	Brenda A Peterson	Peterson, BA; Haak, DC; Nishimura, MT; Teixeira, PJ; James, SR; Dangl, JL; Nimchuk, ZL	Department of Biology, University of North Carolina at Chapel Hill, Chapel Hill, NC, United States of America.	click here	click here	click here	click here	journal
27180265	10.1016/j.jgg.2016.03.005	TALEN-Mediated Homologous Recombination Produces Site-Directed DNA Base Change and Herbicide-Resistant Rice.	Over the last decades, much endeavor has been made to advance genome editing technology due to its promising role in both basic and synthetic biology. The breakthrough has been made in recent years with the advent of sequence-specific endonucleases, especially zinc finger nucleases (ZFNs), transcription activator-like effector nucleases (TALENs) and clustered regularly interspaced short palindrom…	eng	Journal of genetics and genomics = Yi chuan xue bao	J Genet Genomics	101304616	2016	May		43	5	297-305	Internet	Ting Li	Li, T; Liu, B; Chen, CY; Yang, B	Department of Genetics, Development and Cell Biology, Iowa State University, Ames 50011, USA.	click here	click here	click here	click here	journal
[truncated: 533 more rows]

## Sheet: Review Based Publications
PMID	Digital Object ID	Article Title	Abstract	Language	Journal: Title	Journal: Abbreviation	Journal: NLM ID	Journal: Year	Journal: Month	Journal: Medline Date	Journal: Volume	Journal: Issue	Journal: Medline Pagination	Citation Medium	First Author (First Last)	All Authors (Last, Initials)	Affiliation	Related Citations	Related Citations (XML format)	Related Articles by Review	Related Articles by Review (Medline format)	Article Type
[truncated: 144 more rows]

[truncated: 1 more sheets: Original Article Publications]
