# Supplementary material for: Data Mining by Pluralistic Approach on CRISPR Gene Editing in Plants
Source: Front Plant Sci. 2019 Jul 9;10:801. doi: 10.3389/fpls.2019.00801 (PMC6632506; doi:10.3389/fpls.2019.00801)
Supplement: MATERIAL S3 — Vector annotation profiles from published citations. Annotation profile includes Vector Name, Feature names, Type of features, Sequence, Minimum length, Maximum Length, Gap Intervals, Direction-Forward/Reverse. [file Table_2.XLSX]

## Sheet: Edited Gene Lists
PMDID	Gene Name	PMID	Article Title	Abstract	First Author (First Last)	All Authors (Last, Initials)	Affiliation
23999092	GFP	23999092	Demonstration of CRISPR/Cas9/sgRNA-mediated targeted gene modification in Arabidopsis, tobacco, sorghum and rice.	The type II CRISPR/Cas system from Streptococcus pyogenes and its simplified derivative, the Cas9/single guide RNA (sgRNA) system, have emerged as potent new tools for targeted gene knockout in bacteria, yeast, fruit fly, zebrafish and human cells. Here, we describe adaptations of these systems leading to successful expression of the Cas9/sgRNA system in two dicot plant species, Arabidopsis and t…	Wenzhi Jiang	Jiang, W; Zhou, H; Bi, H; Fromm, M; Yang, B; Weeks, DP	Department of Biochemistry, University of Nebraska, Lincoln, NE 68588, USA, Deparment of Genetics, Development and Cell Biology, Iowa State University, Ames, IA 50011, USA and Department of Agronomy and Horticulture, University of Nebraska, Lincoln, NE 68588, USA.
24122057	inox	24122057	CRISPR/Cas9-Mediated Gene Editing in Human iPSC-Derived Macrophage Reveals Lysosomal Acid Lipase Function in Human Macrophages-Brief Report.	To gain mechanistic insights into the role ofLIPA(lipase A), the gene encoding LAL (lysosomal acid lipase) protein, in human macrophages.We used CRISPR (clustered regularly interspaced short palindromic repeats)/Cas9 (CRISPR-associated protein 9) technology to knock outLIPAin human induced pluripotent stem cells and then differentiate to macrophage (human-induced pluripotent stem cells-derived ma…	Hanrui Zhang	Zhang, H; Shi, J; Hachet, MA; Xue, C; Bauer, RC; Jiang, H; Li, W; Tohyama, J; Millar, J; Billheimer, J; Phillips, MC; Razani, B; Rader, DJ; Reilly, MP	From the Division of Cardiology, Department of Medicine, Columbia University Medical Center, New York (H.Z., J.S., M.A.H., C.X., R.C.B., M.P.R.); Irving Institute for Clinical and Translational Research, Columbia University, New York (H.J., M.P.R.); Cardiovascular Institute, Perelman School of Medicine (W.L.), Division of Translational Medicine and Human Genetics, Departments of Genetics and Medi…
	pds
24920971	BEL	24920971	Correction of a pathogenic gene mutation in human embryos.	Genome editing has potential for the targeted correction of germline mutations. Here we describe the correction of the heterozygous MYBPC3 mutation in human preimplantation embryos with precise CRISPR-Cas9-based targeting accuracy and high homology-directed repair efficiency by activating an endogenous, germline-specific DNA repair response. Induced double-strand breaks (DSBs) at the mutant pater…	Hong Ma	Ma, H; Marti-Gutierrez, N; Park, SW; Wu, J; Lee, Y; Suzuki, K; Koski, A; Ji, D; Hayama, T; Ahmed, R; Darby, H; Van Dyken, C; Li, Y; Kang, E; Park, AR; Kim, D; Kim, ST; Gong, J; Gu, Y; Xu, X; Battaglia, D; Krieg, SA; Lee, DM; Wu, DH; Wolf, DP; Heitner, SB; Belmonte, JCI; Amato, P; Kim, JS; Kaul, S; Mitalipov, S	Center for Embryonic Cell and Gene Therapy, Oregon Health &Science University, 3303 Southwest, Bond Avenue, Portland, Oregon 97239, USA.
26022141	Glyma06g14180	26022141	Knocking out of carotenoid catabolic genes in rice fails to boost carotenoid accumulation, but reveals a mutation in strigolactone biosynthesis.	Targeted mutations in five carotenoid catabolism genes failed to boost carotenoid accumulation in rice seeds, but produced dwarf and high tillering mutants when OsCCD7 gene was knocked out. Carotenoids play an important role in human diet as a source of vitamin A. Rice is a major staple food in Asia, but does not accumulate carotenoids in the endosperm because of the low carotenoid biosynthesis o…	Xiaoyu Yang	Yang, X; Chen, L; He, J; Yu, W	Guangdong Provincial Key Laboratory for Plant Epigenetics, College of Life Sciences, Shenzhen University, Shenzhen, 518060, China.
	Glyma08g02290
	Glyma12g37050
26269544	ALS1	26269544	Molecular scissors and their application in genetically modified farm animals.	Molecular scissors (MS), incl. Zinc Finger Nucleases (ZFN), Transcription-activator like endoncleases (TALENS) and meganucleases possess long recognition sites and are thus capable of cutting DNA in a very specific manner. These molecular scissors mediate targeted genetic alterations by enhancing the DNA mutation rate via induction of double-strand breaks at a predetermined genomic site. Compared…	Bjoern Petersen	Petersen, B; Niemann, H	Institute of Farm Animal Genetics, Friedrich-Loeffler-Institut, Hoeltystrasse 10, 31535, Neustadt, Mariensee, Germany, bjoern.petersen@fli.bund.de.
	ALS2
	LIG1
	Ms26
	Ms45
26408904	RIN	26408904	A method for the production and expedient screening of CRISPR/Cas9-mediated non-transgenic mutant plants.	Developing CRISPR/Cas9-mediated non-transgenic mutants in asexually propagated perennial crop plants is challenging but highly desirable. Here, we report a highly useful method using anAgrobacterium-mediated transient CRISPR/Cas9 gene expression system to create non-transgenic mutant plants without the need for sexual segregation. We have also developed a rapid, cost-effective, and high-throughpu…	Longzheng Chen	Chen, L; Li, W; Katin-Grazzini, L; Ding, J; Gu, X; Li, Y; Gu, T; Wang, R; Lin, X; Deng, Z; McAvoy, RJ; Gmitter, FG; Deng, Z; Zhao, Y; Li, Y	1Department of Plant Science and Landscape Architecture, University of Connecticut, Storrs, CT USA.
26498723	Rv2816c	26498723	Rapid breeding of parthenocarpic tomato plants using CRISPR/Cas9.	Parthenocarpy in horticultural crop plants is an important trait with agricultural value for various industrial purposes as well as direct eating quality. Here, we demonstrate a breeding strategy to generate parthenocarpic tomato plants using the CRISPR/Cas9 system. We optimized the CRISPR/Cas9 system to introduce somatic mutations effectively into SlIAA9-a key gene controlling parthenocarpy-with…	Risa Ueta	Ueta, R; Abe, C; Watanabe, T; Sugano, SS; Ishihara, R; Ezura, H; Osakabe, Y; Osakabe, K	Graduate School of Advanced Technology and Science, Tokushima University, Tokushima, Japan.
26543098	ATP-binding cassette, subfamily A, member 1(ABCA1)	26543098	Efficient CRISPR/Cas9-Mediated Genome Editing Using a Chimeric Single-Guide RNA Molecule.	The CRISPR/Cas9 system has been applied in diverse eukaryotic organisms for targeted mutagenesis. However, targeted gene editing is inefficient and requires the simultaneous delivery of a DNA template for homology-directed repair (HDR). Here, we used CRISPR/Cas9 to generate targeted double-strand breaks and to deliver an RNA repair template for HDR in rice (Oryza sativa). We used chimeric single-…	Haroon Butt	Butt, H; Eid, A; Ali, Z; Atia, MAM; Mokhtar, MM; Hassan, N; Lee, CM; Bao, G; Mahfouz, MM	Laboratory for Genome Engineering, Division of Biological Sciences, King Abdullah University of Science and TechnologyThuwal, Saudi Arabia.
26808139	Eukaryotic translation initiation factor 4E)	26808139	CRISPR/Cas mutagenesis of soybean and Medicago truncatula using a new web-tool and a modified Cas9 enzyme.	The CRISPR/Cas9 system is rapidly becoming the reagent of choice for targeted mutagenesis and gene editing in crop species. There are currently intense research efforts in the crop sciences to identify efficient CRISPR/Cas9 platforms to carry out targeted mutagenesis and gene editing projects. These efforts typically result in the incremental tweaking of various platform components including the …	Jean-Michel Michno	Michno, JM; Wang, X; Liu, J; Curtin, SJ; Kono, TJ; Stupar, RM	a Department of Agronomy and Plant Genetics ; University of Minnesota ; Saint Paul , MN USA.
26848986	Proline-rich tyrosine kinase 2 (Pyk2)	26848986	RNA-guided genome editing in plants using a CRISPR-Cas system.	Precise and straightforward methods to edit the plant genome are much needed for functional genomics and crop improvement. Recently, RNA-guided genome editing using bacterial Type II cluster regularly interspaced short palindromic repeats (CRISPR)-associated nuclease (Cas) is emerging as an efficient tool for genome editing in microbial and animal systems. Here, we report the genome editing and t…	Kabin Xie	Xie, K; Yang, Y	Department of Plant Pathology and Environmental Microbiology, The Huck Institute of the Life Sciences, Pennsylvania State University, University Park, PA 16802, USA.
26961357	GmMlo	26961357	Small GTPase Rab8a-recruited Phosphatidylinositol 3-Kinase γ Regulates Signaling and Cytokine Outputs from Endosomal Toll-like Receptors.	LPS-mediated activation of Toll-like receptor 4 (TLR4) in macrophages results in the coordinated release of proinflammatory cytokines, followed by regulatory mediators, to ensure that this potentially destructive pathway is tightly regulated. We showed previously that Rab8a recruits PI3Kγ for Akt-dependent signaling during TLR4 activation to limit the production of the proinflammatory cytokines I…	Adam A Wall	Wall, AA; Luo, L; Hung, Y; Tong, SJ; Condon, ND; Blumenthal, A; Sweet, MJ; Stow, JL	From the Institute for Molecular Bioscience (IMB) and IMB Centre for Inflammation and Disease Research, University of Queensland, Brisbane, Queensland 4072, Australia and.
	CcMlo
	CcMlo12
	CcMlo14
	Mlo
	PvMlo
	PvMlo11
	PvMlo12
27033976	miRNA(MIR169a and MIR827a)	27033976	Evolving paradigms in clinical pharmacology and therapeutics for the treatment of Duchenne muscular dystrophy.	Progressive muscle weakness and degeneration due to the lack of dystrophin eventually leads to the loss of independent ambulation by the middle of the patient's second decade, and a fatal outcome due to cardiac or respiratory failure by the third decade. More specifically, loss of sarcolemmal dystrophin and the dystrophin-associated glycoprotein (DAG) complex promotes muscle fiber damage during m…	J Huard	Huard, J; Mu, X; Lu, A	Department of Orthopedic Surgery, McGovern Medical School, University of Texas Health Science Center at Houston, Houston, Texas, USA.
27116122	OsERF922	27116122	Extensive intra-phylotype diversity in lactobacilli and bifidobacteria from the honeybee gut.	In the honeybee Apis mellifera, the bacterial gut community is consistently colonized by eight distinct phylotypes of bacteria. Managed bee colonies are of considerable economic interest and it is therefore important to elucidate the diversity and role of this microbiota in the honeybee. In this study, we have sequenced the genomes of eleven strains of lactobacilli and bifidobacteria isolated fro…	Kirsten M Ellegaard	Ellegaard, KM; Tamarit, D; Javelind, E; Olofsson, TC; Andersson, SG; Vásquez, A	Department of Molecular Evolution, Cell and Molecular Biology, Science for Life Laboratory, Biomedical Centre, Uppsala University, Husargatan 3, SE-751 24, Uppsala, Sweden. kirsten-maren.ellegaard@icm.uu.se.
27193190	C9orf72	27193190	Streamlined ex vivo and in vivo genome editing in mouse embryos using recombinant adeno-associated viruses.	Recent advances using CRISPR-Cas9 approaches have dramatically enhanced the ease for genetic manipulation in rodents. Notwithstanding, the methods to deliver nucleic acids into pre-implantation embryos have hardly changed since the original description of mouse transgenesis more than 30 years ago. Here we report a novel strategy to generate genetically modified mice by transduction of CRISPR-Cas9…	Yeonsoo Yoon	Yoon, Y; Wang, D; Tai, PWL; Riley, J; Gao, G; Rivera-Pérez, JA	Department of Pediatrics, Division of Genes and Development, University of Massachusetts Medical School, 55 Lake Avenue North, Worcester, MA, 01655, USA.
27403935	olfactory receptor co-receptor Orco	27403935	CRISPR/Cas9 targeting of GPRC6A suppresses prostate cancer tumorigenesis in a human xenograft model.	GPRC6A is implicated in the pathogenesis of prostate cancer, but its role remains uncertain because of a purported tolerant gene variant created by substitution of a K..Y polymorphism in the 3rd intracellular loop (IL) that evolved in the majority of humans and replaces the ancestral RKLP present in 40% of humans of African descent and all other species.We determined whether the K..Y polymorphism…	Ruisong Ye	Ye, R; Pi, M; Cox, JV; Nishimoto, SK; Quarles, LD	Department of Medicine, University of Tennessee Health Science Center, 19 S Manassas St., Memphis, TN, 38163, USA.
27442592	ARGOS8	27442592	Chronic sun exposure-related fusion oncogenes EGFR-PPARGC1A in cutaneous squamous cell carcinoma.	Cutaneous squamous cell carcinoma (cSCC) differs from SCC of other organs in its strong association with chronic sun exposure. However, the specific driver mutations in cSCC remain unknown. Fusion genes in established cSCC cell lines (A431 and DJM-1) were predicted by transcriptome sequence, and validated by Sanger sequence, fluorescence in situ hybridization and G-banding. By transcriptome seque…	Sho Egashira	Egashira, S; Jinnin, M; Ajino, M; Shimozono, N; Okamoto, S; Tasaki, Y; Hirano, A; Ide, M; Kajihara, I; Aoi, J; Harada, M; Igata, T; Masuguchi, S; Fukushima, S; Ihn, H	Department of Dermatology and Plastic Surgery, Faculty of Life Sciences, Kumamoto University, 1-1-1 Honjo, Chuo-ku, Kumamoto, 860-8556, Japan.
27493650	ACETOLACTATE SYNTHASE1 (ALS1)	27493650	The Search for Resistance to Cassava Mosaic Geminiviruses: How Much We Have Accomplished, and What Lies Ahead.	The cassava mosaic disease (CMD), which occurs in all cassava growing regions of Africa and the Indian subcontinent, is caused by cassava mosaic geminiviruses (CMGs). CMGs are considered to be the most damaging vector-borne plant pathogens. So far, the most successful approach used to control these viruses has been the transfer of a polygenic recessive resistance locus, designated CMD1, from wild…	Vincent N Fondong	Fondong, VN	Department of Biological Sciences, Delaware State University Dover, DE, USA.
27530958	Phytoene desaturase (PDS)	27530958	Multiplexed Transcriptional Activation or Repression in Plants Using CRISPR-dCas9-Based Systems.	Novel tools and methods for regulating in vivo plant gene expression are quickly gaining popularity and utility due to recent advances in CRISPR-dCas9 chimeric effector regulators, otherwise known as CRISPR artificial transcription factors (CRISPR-ATFs). These tools are especially useful for studying gene function and interaction within various regulatory networks. First generation CRISPR-ATFs ar…	Levi G Lowder	Lowder, LG; Paul, JW; Qi, Y	Department of Biology, East Carolina University, Greenville, NC, 27858, USA.
27667451	Bromodomain containing 3 (Brd3)	27667451	Genome editing with CRISPR/Cas9 in postnatal mice corrects PRKAG2 cardiac syndrome.	PRKAG2 cardiac syndrome is an autosomal dominant inherited disease resulted from mutations in the PRKAG2 gene that encodes γ2 regulatory subunit of AMP-activated protein kinase. Affected patients usually develop ventricular tachyarrhythmia and experience progressive heart failure that is refractory to medical treatment and requires cardiac transplantation. In this study, we identify a H530R mutat…	Chang Xie	Xie, C; Zhang, YP; Song, L; Luo, J; Qi, W; Hu, J; Lu, D; Yang, Z; Zhang, J; Xiao, J; Zhou, B; Du, JL; Jing, N; Liu, Y; Wang, Y; Li, BL; Song, BL; Yan, Y	Hubei Key Laboratory of Cell Homeostasis, College of Life Sciences, Wuhan University, Wuhan 430072, China.
27862876	SlAGL6	27862876	Personalized therapeutic strategies for patients with retinitis pigmentosa.	Retinitis pigmentosa (RP) encompasses many different hereditary retinal degenerations that are caused by a vast array of different gene mutations and have highly variable disease presentations and severities. This heterogeneity poses a significant therapeutic challenge, although an answer may eventually be found through two recent innovations: induced pluripotent stem cells (iPSCs) and clustered …	Andrew Zheng	Zheng, A; Li, Y; Tsang, SH	Columbia University, College of Physicians and Surgeons , 50 Haven Ave, Box #123, Bard Hall, New York, NY 10032 , USA.
	Slagl6
27874087	TGMS	27874087	Multiplex CRISPR/Cas9-based genome editing for correction of dystrophin mutations that cause Duchenne muscular dystrophy.	The CRISPR/Cas9 genome-editing platform is a promising technology to correct the genetic basis of hereditary diseases. The versatility, efficiency and multiplexing capabilities of the CRISPR/Cas9 system enable a variety of otherwise challenging gene correction strategies. Here, we use the CRISPR/Cas9 system to restore the expression of the dystrophin gene in cells carrying dystrophin mutations th…	David G Ousterout	Ousterout, DG; Kabadi, AM; Thakore, PI; Majoros, WH; Reddy, TE; Gersbach, CA	Department of Biomedical Engineering, Duke University, Room 136 Hudson Hall, Box 90281, Durham, North Carolina 27708, USA.
27885771	CsFAD2	27885771	Sequential cancer mutations in cultured human intestinal stem cells.	Crypt stem cells represent the cells of origin for intestinal neoplasia. Both mouse and human intestinal stem cells can be cultured in medium containing the stem-cell-niche factors WNT, R-spondin, epidermal growth factor (EGF) and noggin over long time periods as epithelial organoids that remain genetically and phenotypically stable. Here we utilize CRISPR/Cas9 technology for targeted gene modifi…	Jarno Drost	Drost, J; van Jaarsveld, RH; Ponsioen, B; Zimberlin, C; van Boxtel, R; Buijs, A; Sachs, N; Overmeer, RM; Offerhaus, GJ; Begthel, H; Korving, J; van de Wetering, M; Schwank, G; Logtenberg, M; Cuppen, E; Snippert, HJ; Medema, JP; Kops, GJ; Clevers, H	1] Hubrecht Institute, Royal Netherlands Academy of Arts and Sciences (KNAW) and UMC Utrecht, 3584CT Utrecht, The Netherlands [2] Cancer Genomics Netherlands, UMC Utrecht, 3584CG Utrecht, The Netherlands.
	FAD2
27918538	SP5G	27918538	Parameters affecting frequency of CRISPR/Cas9 mediated targeted mutagenesis in rice.	Frequency of CRISPR/Cas9-mediated targeted mutagenesis varies depending on Cas9 expression level and culture period of rice callus. Recent reports have demonstrated that the CRISPR/Cas9 system can function as a sequence-specific nuclease in various plant species. Induction of mutation in proliferating tissue during embryogenesis or in germline cells is a practical means of generating heritable mu…	Masafumi Mikami	Mikami, M; Toki, S; Endo, M	Graduate School of Nanobioscience, Yokohama City University, 22-2 Seto, Yokohama, Kanagawa, 236-0027, Japan.
27936512	CsLOB1	27936512	RNA-guided transcriptional regulation in planta via synthetic dCas9-based transcription factors.	Targeted genomic regulation is a powerful approach to accelerate trait discovery and development in agricultural biotechnology. Bacteria and archaea use clustered regularly interspaced short palindromic repeats (CRISPRs) and CRISPR-associated (Cas) regulatory systems for adaptive molecular immunity against foreign nucleic acids introduced by invading phages and conjugative plasmids. The type II C…	Agnieszka Piatek	Piatek, A; Ali, Z; Baazim, H; Li, L; Abulfaraj, A; Al-Shareef, S; Aouida, M; Mahfouz, MM	Division of Biological and Environmental Sciences and Engineering, King Abdullah University of Science and Technology, Thuwal, Saudi Arabia.
27995308	ClPDS	27995308	Targeted genome regulation and modification using transcription activator-like effectors.	Transcription activator-like effectors (TALEs) are immensely powerful new tools for genome engineering that can be directed to bind to almost any DNA sequence of choice. They originate from the Xanthomonas species of plant pathogenic bacteria and, in nature, these proteins increase the virulence of Xanthomonas. However, in 2009, the DNA binding code of TALEs was deciphered and, subsequently, TALE…	James N F Scott	Scott, JN; Kupinski, AP; Boyes, J	School of Molecular and Cellular Biology, Faculty of Biological Sciences, University of Leeds, UK.
	phytoene desaturase
28066464	MLO-7	28066464	Insights into the completely annotated genome of Lactobacillus buchneri CD034, a strain isolated from stable grass silage.	Lactobacillus buchneri belongs to the group of heterofermentative lactic acid bacteria and is a common member of the silage microbiome. Here we report the completely annotated genomic sequence of L. buchneri CD034, a strain isolated from stable grass silage. The whole genome of L. buchneri CD034 was sequenced on the Roche Genome Sequencer FLX platform. It was found to consist of four replicons, a…	Stefan Heinl	Heinl, S; Wibberg, D; Eikmeyer, F; Szczepanowski, R; Blom, J; Linke, B; Goesmann, A; Grabherr, R; Schwab, H; Pühler, A; Schlüter, A	Christian Doppler Laboratory for Genetically Engineered Lactic Acid Bacteria, University of Natural Resources and Life Sciences, Department of Biotechnology, A-1190 Vienna, Austria. stefan.heinl@boku.ac.at
28143571	NRAMP1	28143571	Genome editing in Ustilago maydis using the CRISPR-Cas system.	This communication describes the establishment of the type II bacterial CRISPR-Cas9 system to efficiently disrupt target genes in the fungal maize pathogen Ustilago maydis. A single step transformation of a self-replicating plasmid constitutively expressing the U. maydis codon-optimized cas9 gene and a suitable sgRNA under control of the U. maydis U6 snRNA promoter was sufficient to induce genome…	Mariana Schuster	Schuster, M; Schweizer, G; Reissmann, S; Kahmann, R	Max Planck Institute for Terrestrial Microbiology, Department of Organismic Interactions, Karl-von-Frisch-Strasse 10, 35043 Marburg, Germany.
28256553	SmCPS1	28256553	Rapid generation of genetic diversity by multiplex CRISPR/Cas9 genome editing in rice.	The clustered regularly interspaced short palindromic repeats (CRISPR)-associated endonuclease 9 (CRISPR/Cas9) system has emerged as a promising technology for specific genome editing in many species. Here we constructed one vector targeting eight agronomic genes in rice using the CRISPR/Cas9 multiplex genome editing system. By subsequent genetic transformation and DNA sequencing, we found that t…	Lan Shen	Shen, L; Hua, Y; Fu, Y; Li, J; Liu, Q; Jiao, X; Xin, G; Wang, J; Wang, X; Yan, C; Wang, K	State Key Laboratory of Rice Biology, China National Rice Research Institute, Chinese Academy of Agricultural Sciences, Hangzhou, 310006, China.
28258551	GFP	28258551	Engineering Plant Immunity: Using CRISPR/Cas9 to Generate Virus Resistance.	Plant viruses infect many economically important crops, including wheat, cotton, maize, cassava, and other vegetables. These viruses pose a serious threat to agriculture worldwide, as decreases in cropland areaper capitamay cause production to fall short of that required to feed the increasing world population. Under these circumstances, conventional strategies can fail to control rapidly evolvin…	Syed Shan-E-Ali Zaidi	Zaidi, SS; Tashkandi, M; Mansoor, S; Mahfouz, MM	Laboratory for Genome Engineering, Division of Biological Sciences, King Abdullah University of Science and TechnologyThuwal, Saudi Arabia; National Institute for Biotechnology and Genetic EngineeringFaisalabad, Pakistan.
28360425	SlIAA9-a	28360425	Genome-wide profiling of genetic variation in Agrobacterium-transformed rice plants.	Agrobacterium-mediated transformation has been widely used in producing transgenic plants, and was recently used to generate "transgene-clean" targeted genomic modifications coupled with the clustered regularly interspaced short palindromic repeats (CRISPR)/CRISPR-associated (Cas9) system. Although tremendous variation in morphological and agronomic traits, such as plant height, seed fertility, a…	Wen-Xu Li	Li, WX; Wu, SL; Liu, YH; Jin, GL; Zhao, HJ; Fan, LJ; Shu, QY	State Key Laboratory of Rice Biology, Institute of Crop Sciences, Zhejiang University, Hangzhou 310058, China.
28422754	MPEG1	28422754	CRISPR/Cas9-Mediated Immunity in Plants Against Pathogens.	Global crop production is highly threatened due to pathogen invasion. The huge quantity of pesticides application, although harmful to the environment and human health, is carried out to prevent the crop losses worldwide, every year. Therefore, understanding the molecular mechanisms of pathogenicity and plant resistance against pathogen is important. The resistance against pathogens is regulated …	Muhammad Sameeullah	Sameeullah, M; Khan, FA; Özer, G; Aslam, N; Gurel, E; Waheed, MT; Karadeniz, T	Department of Horticulture, Faculty of Agriculture and Natural Sciences, Abant Izzet Baysal University, Bolu, Turkey.
28444368	CsDGAT1	28444368	Plant-pathogen interactions: toward development of next-generation disease-resistant plants.	Briskly evolving phytopathogens are dire threats to our food supplies and threaten global food security. From the recent advances made toward high-throughput sequencing technologies, understanding of pathogenesis and effector biology, and plant innate immunity, translation of these means into new control tools is being introduced to develop durable disease resistance. Effectoromics as a powerful …	Naghmeh Nejat	Nejat, N; Rookes, J; Mantri, NL; Cahill, DM	a School of Applied Sciences, Health Innovations Research Institute, RMIT University , Melbourne , Victoria , Australia.
	CsPDAT1
28475701	aA-crystallin	28475701	Somatic Embryogenesis in Coffee: The Evolution of Biotechnology and the Integration of Omics Technologies Offer Great Opportunities.	One of the most important crops cultivated around the world is coffee. There are two main cultivated species,Coffea arabicaandC. canephora.Both species are difficult to improve through conventional breeding, taking at least 20 years to produce a new cultivar. Biotechnological tools such as genetic transformation, micropropagation and somatic embryogenesis (SE) have been extensively studied in ord…	Nádia A Campos	Campos, NA; Panis, B; Carpentier, SC	Department of Biosystems, KU LeuvenLeuven, Belgium.
28542349	VvPDS	28542349	The myeloid heat shock transcription factor 1/β-catenin axis regulates NLR family, pyrin domain-containing 3 inflammasome activation in mouse liver ischemia/reperfusion injury.	Heat shock transcription factor 1 (HSF1) has been implicated in the differential regulation of cell stress and disease states. β-catenin activation is essential for immune homeostasis. However, little is known about the role of macrophage HSF1-β-catenin signaling in the regulation of NLRP3 inflammasome activation during ischemia/reperfusion (I/R) injury (IRI) in the liver. This study investigated…	Shi Yue	Yue, S; Zhu, J; Zhang, M; Li, C; Zhou, X; Zhou, M; Ke, M; Busuttil, RW; Ying, QL; Kupiec-Weglinski, JW; Xia, Q; Ke, B	The Dumont-UCLA Transplant Center, Division of Liver and Pancreas Transplantation, Department of Surgery, David Geffen School of Medicine at UCLA, Los Angeles, CA.
28548094	PSY1	28548094	CRISPR/Cas9 for plant genome editing: accomplishments, problems and prospects.	The increasing burden of the world population on agriculture requires the development of more robust crops. Dissecting the basic biology that underlies plant development and stress responses will inform the design of better crops. One powerful tool for studying plants at the molecular level is the RNA-programmed genome editing system composed of a clustered regularly interspaced short palindromic…	Joseph W Paul	Paul, JW; Qi, Y	Department of Biology, Thomas Harriot College of Arts and Sciences, East Carolina University, Greenville, NC, 27858, USA.
28585692	OsGCD1	28585692	The CRISPR-Cas system for plant genome editing: advances and opportunities.	Genome editing is an approach in which a specific target DNA sequence of the genome is altered by adding, removing, or replacing DNA bases. Artificially engineered hybrid enzymes, zinc-finger nucleases (ZFNs), and transcription activator-like effector nucleases (TALENs), and the CRISPR (clustered regularly interspaced short palindromic repeats)-Cas (CRISPR-associated protein) system are being use…	Vinay Kumar	Kumar, V; Jain, M	Functional and Applied Genomics Laboratory, National Institute of Plant Genome Research (NIPGR), New Delhi-110067, India.
28635594	Zfp36	28635594	QTL editing confers opposing yield performance in different rice varieties.	Grain yield is one of the most important and complex trait for genetic improvement in crops; it is known to be controlled by a number of genes known as quantitative trait loci (QTLs). In the past decade, many yield-contributing QTLs have been identified in crops. However, it remains unclear whether those QTLs confer the same yield performance in different genetic backgrounds. Here, we performed C…	Lan Shen	Shen, L; Wang, C; Fu, Y; Wang, J; Liu, Q; Zhang, X; Yan, C; Qian, Q; Wang, K	Key Laboratory of Plant Functional Genomics, Ministry of Education, Yangzhou University, Yangzhou 225009, China.
28640964	PGM	28640964	Genetically Engineered Macrophages: A Potential Platform for Cancer Immunotherapy.	In spite of their successes against hematologic malignancies, immunotherapeutic interventions for the treatment of patients with glioblastoma (GBM) have thus far been unsuccessful. This is in part due to the presence of a tumor microenvironment that fosters neoplastic growth and protects the tumor from destruction by the immune system. A novel genetically engineered macrophage-based platform has …	Kara W Moyes	Moyes, KW; Lieberman, NA; Kreuser, SA; Chinn, H; Winter, C; Deutsch, G; Hoglund, V; Watson, R; Crane, CA	1 Ben Towne Center for Childhood Cancer Research, Seattle Children's Research Institute , Seattle, Washington.
	tb1 a
	tb1 b
28640983	tomato phytoene desaturase	28640983	Exploiting induced pluripotent stem cell-derived macrophages to unravel host factors influencing Chlamydia trachomatis pathogenesis.	Chlamydia trachomatis remains a leading cause of bacterial sexually transmitted infections and preventable blindness worldwide. There are, however, limited in vitro models to study the role of host genetics in the response of macrophages to this obligate human pathogen. Here, we describe an approach using macrophages derived from human induced pluripotent stem cells (iPSdMs) to study macrophage-C…	Amy T Y Yeung	Yeung, ATY; Hale, C; Lee, AH; Gill, EE; Bushell, W; Parry-Smith, D; Goulding, D; Pickard, D; Roumeliotis, T; Choudhary, J; Thomson, N; Skarnes, WC; Dougan, G; Hancock, REW	Wellcome Trust Sanger Institute, Wellcome Trust Genome Campus, Hinxton, Cambridge CB10 1SA, UK.
28659944	OsbZIP23	28659944	Development of SH2 probes and pull-down assays to detect pathogen-induced, site-specific tyrosine phosphorylation of the TLR adaptor SCIMP.	Protein tyrosine phosphorylation guides many molecular interactions for cellular functions. SCIMP is a transmembrane adaptor protein (TRAP) family member that mediates selective proinflammatory cytokine responses generated by pathogen-activated Toll-like receptor (TLR) pathways in macrophages. TLR activation triggers SCIMP phosphorylation and selective phosphorylation of distinct tyrosine residue…	Lin Luo	Luo, L; Tong, SJ; Wall, AA; Khromykh, T; Sweet, MJ; Stow, JL	Institute for Molecular Bioscience (IMB) and IMB Centre for Inflammation and Disease Research, The University of Queensland, Brisbane, Queensland, Australia.
	OsLEA3
	OsOREB1
	OsRab16b
	OsRab21
	OsSLAC1
	OsSLAC7
28701426	ASC	28701426	The commercialization of genome-editing technologies.	The emergence of new gene-editing technologies is profoundly transforming human therapeutics, agriculture, and industrial biotechnology. Advances in clustered regularly interspaced short palindromic repeats (CRISPR) have created a fertile environment for mass-scale manufacturing of cost-effective products ranging from basic research to translational medicine. In our analyses, we evaluated the pat…	Katelyn Brinegar	Brinegar, K; K Yetisen, A; Choi, S; Vallillo, E; Ruiz-Esparza, GU; Prabhakar, AM; Khademhosseini, A; Yun, SH	a Harvard-MIT Division of Health Sciences and Technology , Massachusetts Institute of Technology , Cambridge , MA , USA.
28747644	Caspase b	28747644	Cleavage of GSDMD by inflammatory caspases determines pyroptotic cell death.	Inflammatory caspases (caspase-1, -4, -5 and -11) are critical for innate defences. Caspase-1 is activated by ligands of various canonical inflammasomes, and caspase-4, -5 and -11 directly recognize bacterial lipopolysaccharide, both of which trigger pyroptosis. Despite the crucial role in immunity and endotoxic shock, the mechanism for pyroptosis induction by inflammatory caspases is unknown. He…	Jianjin Shi	Shi, J; Zhao, Y; Wang, K; Shi, X; Wang, Y; Huang, H; Zhuang, Y; Cai, T; Wang, F; Shao, F	Peking University-Tsinghua University-National Institute of Biological Sciences Joint Graduate Program, School of Life Sciences, Tsinghua University, 100084, China.
28765632	SlGAD1-5	28765632	Genome sequence and rapid evolution of the rice pathogen Xanthomonas oryzae pv. oryzae PXO99A.	Xanthomonas oryzae pv. oryzae causes bacterial blight of rice (Oryza sativa L.), a major disease that constrains production of this staple crop in many parts of the world. We report here on the complete genome sequence of strain PXO99A and its comparison to two previously sequenced strains, KACC10331 and MAFF311018, which are highly similar to one another.The PXO99A genome is a single circular ch…	Steven L Salzberg	Salzberg, SL; Sommer, DD; Schatz, MC; Phillippy, AM; Rabinowicz, PD; Tsuge, S; Furutani, A; Ochiai, H; Delcher, AL; Kelley, D; Madupu, R; Puiu, D; Radune, D; Shumway, M; Trapnell, C; Aparna, G; Jha, G; Pandey, A; Patil, PB; Ishihara, H; Meyer, DF; Szurek, B; Verdier, V; Koebnik, R; Dow, JM; Ryan, RP; Hirata, H; Tsuyumu, S; Won Lee, S; Seo, YS; Sriariyanum, M; Ronald, PC; Sonti, RV; Van Sluys, MA;…	Center for Bioinformatics and Computational Biology, University of Maryland, College Park, MD 20742, USA. salzberg@umd.edu
	SlGAD2
	SlGAD3
28824692	GhCLA1	28824692	Pea early-browning virus-mediated genome editing via the CRISPR/Cas9 system in Nicotiana benthamiana and Arabidopsis.	The clustered regularly interspaced palindromic repeats (CRISPR)/CRISPR-associated (Cas9) system has enabled efficient genome engineering in diverse plant species. However, delivery of genome engineering reagents, such as the single guide RNA (sgRNA), into plant cells remains challenging. Here, we report the engineering of Tobacco rattle virus (TRV) and Pea early browning virus (PEBV) to deliver …	Zahir Ali	Ali, Z; Eid, A; Ali, S; Mahfouz, MM	Laboratory for Genome Engineering, Division of Environmental and Biological Sciences and Engineering, 4700 King Abdullah University of Science and Technology, Thuwal, 23955-6900, Saudi Arabia.
	GhPDS
28904407	c-Abl SH3 domain binding protein-2 (3BP2)	28904407	Multiplex CRISPR/Cas9-Based Genome Editing in Human Hematopoietic Stem Cells Models Clonal Hematopoiesis and Myeloid Neoplasia.	Hematologic malignancies are driven by combinations of genetic lesions that have been difficult to model in human cells. We used CRISPR/Cas9 genome engineering of primary adult and umbilical cord blood CD34+human hematopoietic stem and progenitor cells (HSPCs), the cells of origin for myeloid pre-malignant and malignant diseases, followed by transplantation into immunodeficient mice to generate g…	Zuzana Tothova	Tothova, Z; Krill-Burger, JM; Popova, KD; Landers, CC; Sievers, QL; Yudovich, D; Belizaire, R; Aster, JC; Morgan, EA; Tsherniak, A; Ebert, BL	Department of Medical Oncology, Dana Farber Cancer Institute, Boston, MA 02115, USA; Division of Hematology, Brigham and Women's Hospital, Boston, MA 02115, USA; Broad Institute of MIT and Harvard, Cambridge, MA 02142, USA.
28928381	ALC	28928381	Interspecies Chimerism with Mammalian Pluripotent Stem Cells.	Interspecies blastocyst complementation enables organ-specific enrichment of xenogenic pluripotent stem cell (PSC) derivatives. Here, we establish a versatile blastocyst complementation platform based on CRISPR-Cas9-mediated zygote genome editing and show enrichment of rat PSC-derivatives in several tissues of gene-edited organogenesis-disabled mice. Besides gaining insights into species evolutio…	Jun Wu	Wu, J; Platero-Luengo, A; Sakurai, M; Sugawara, A; Gil, MA; Yamauchi, T; Suzuki, K; Bogliotti, YS; Cuello, C; Morales Valencia, M; Okumura, D; Luo, J; Vilariño, M; Parrilla, I; Soto, DA; Martinez, CA; Hishida, T; Sánchez-Bautista, S; Martinez-Martinez, ML; Wang, H; Nohalez, A; Aizawa, E; Martinez-Redondo, P; Ocampo, A; Reddy, P; Roca, J; Maga, EA; Esteban, CR; Berggren, WT; Nuñez Delicado, E; Laj…	Salk Institute for Biological Studies, 10010 N. Torrey Pines Road, La Jolla, CA 92037, USA.
28973003	Salt-inducible kinases (SIK)	28973003	Generation of targeted mutant rice using a CRISPR-Cpf1 system.	CRISPR-Cpf1 is a newly identified CRISPR-Cas system, and Cpf1 was recently engineered as a molecular tool for targeted genome editing in mammalian cells. To test whether the engineered CRISPR-Cpf1 system could induce the production of rice mutants, we selected two genome targets in the OsPDS and OsBEL genes. Our results show that both targets could be efficiently mutated in transgenic rice plants…	Rongfang Xu	Xu, R; Qin, R; Li, H; Li, D; Li, L; Wei, P; Yang, J	Key Laboratory of Rice Genetic Breeding of Anhui Province, Rice Research Institute, Anhui Academy of Agricultural Sciences, Hefei, China.
29087011	Dicer-like2	29087011	RRP42, a Subunit of Exosome, Plays an Important Role in Female Gametophytes Development and Mesophyll Cell Morphogenesis inArabidopsis.	The exosome complex plays a central and essential role in RNA metabolism. However, current research on functions of exosome subunit in plants is limited. Here, we used an egg cell-specific promoter-controlled CRISPR/Cas9 system to knock outRRP42which encodes a core subunit of theArabidopsisexosome and presented evidence that RRP42 is essential for the development of female gametophytes. Next, we …	Xiaoyuan Yan	Yan, X; Yan, Z; Han, Y	State Key Laboratory of Plant Physiology and Biochemistry, College of Biological Sciences, China Agricultural UniversityBeijing, China.
	GmDrb2a
	GmDrb2b
	GmHen1a
	MtHen1
29093724	MePDS	29093724	The Role of DAF-21/Hsp90 in Mouth-Form Plasticity in Pristionchus pacificus.	Phenotypic plasticity is increasingly recognized to facilitate adaptive change in plants and animals, including insects, nematodes, and vertebrates. Plasticity can occur as continuous or discrete (polyphenisms) variation. In social insects, for example, in ants, some species have workers of distinct size classes while in other closely related species variation in size may be continuous. Despite t…	Bogdan Sieriebriennikov	Sieriebriennikov, B; Markov, GV; Witte, H; Sommer, RJ	Department of Evolutionary Biology, Max Planck Institute for Developmental Biology, Tübingen, Germany.
29094203	Microphthalmia-associated transcription factor (MITF)	29094203	PtoMYB170 positively regulates lignin deposition during wood formation in poplar and confers drought tolerance in transgenic Arabidopsis.	Wood formation is a complex developmental process under multi-level transcriptional control executed by a large set of transcription factors. However, only limited members have been characterized to be key regulators of lignin biosynthesis in poplar. Here we report the conserved and unique functions of PtoMYB170, a transcription factor identified from Populus tomentosa (Chinese white poplar), in …	Changzheng Xu	Xu, C; Fu, X; Liu, R; Guo, L; Ran, L; Li, C; Tian, Q; Jiao, B; Wang, B; Luo, K	Key Laboratory of Eco-environments of Three Gorges Reservoir Region, Ministry of Education, Chongqing Key Laboratory of Transgenic Plant and Safety Control, Institute of Resources Botany, School of Life Sciences, Southwest University, 400715 Chongqing, China.
29114997	toll-like receptor-4	29114997	Spermatogonial stem cell autotransplantation and germline genomic editing: a future cure for spermatogenic failure and prevention of transmission of genomic diseases.	Subfertility affects approximately 15% of all couples, and a severe male factor is identified in 17% of these couples. While the etiology of a severe male factor remains largely unknown, prior gonadotoxic treatment and genomic aberrations have been associated with this type of subfertility. Couples with a severe male factor can resort to ICSI, with either ejaculated spermatozoa (in case of oligoz…	Callista L Mulder	Mulder, CL; Zheng, Y; Jan, SZ; Struijk, RB; Repping, S; Hamer, G; van Pelt, AM	Center for Reproductive Medicine, Amsterdam Research Institute Reproduction and Development, Academic Medical Centre, University of Amsterdam, 1105 AZ Amsterdam, The Netherlands.
29163439	aMNN4	29163439	Oncogenic Transformation of Human-Derived Gastric Organoids.	The culture of organoids has represented a significant advancement in the gastrointestinal research field. Previous research studies have described the oncogenic transformation of human intestinal and mouse gastric organoids. Here we detail the protocol for the oncogenic transformation and orthotopic transplantation of human-derived gastric organoids.	Nina Bertaux-Skeirik	Bertaux-Skeirik, N; Centeno, J; Gao, J; Gabre, J; Zavros, Y	Department of Molecular and Cellular Physiology, University of Cincinnati College of Medicine, Cincinnati, OH, USA.
29163623	CBF1	29163623	Humanized mouse as an appropriate model for accelerated global HIV research and vaccine development: current trend.	Humanized mouse models currently have seen improved development and have received wide applications. Its usefulness is observed in cell and tissue transplant involving basic and applied human disease research. In this article, the development of a new generation of humanized mice was discussed as well as their relevant application in HIV disease. Furthermore, current techniques employed to overco…	Bartholomew Okechukwu Ibeh	Ibeh, BO; Furuta, Y; Habu, JB; Ogbadu, L	a Immunovirology and Vaccine Development Laboratory, Medical Biotechnology Department , National Biotechnology Development Agency , Abuja , Nigeria ;
	CBF2
	CBF3
29210506	Waxy	29210506	Next-Generation Sequencing and Genome Editing in Plant Virology.	Next-generation sequencing (NGS) has been applied to plant virology since 2009. NGS provides highly efficient, rapid, low cost DNA, or RNA high-throughput sequencing of the genomes of plant viruses and viroids and of the specific small RNAs generated during the infection process. These small RNAs, which cover frequently the whole genome of the infectious agent, are 21-24 nt long and are known as …	Ahmed Hadidi	Hadidi, A; Flores, R; Candresse, T; Barba, M	United States Department of Agriculture - Agricultural Research Service Beltsville, MD, USA.
29213323	CL	29213323	Elucidating the Role of Effectors in Plant-Fungal Interactions: Progress and Challenges.	Pathogenic fungi have diverse growth lifestyles that support fungal colonization on plants. Successful colonization and infection for all lifestyles depends upon the ability to modify living host plants to sequester the necessary nutrients required for growth and reproduction. Secretion of virulence determinants referred to as "effectors" is assumed to be the key governing factor that determines …	Carrie Selin	Selin, C; de Kievit, TR; Belmonte, MF; Fernando, WG	Department of Plant Science, University of Manitoba Winnipeg, MB, Canada.
	Pv4CL1
	Pv4CL2
	Pv4CL3
29216494	FAE1-B	29216494	Cytokinin: a key driver of seed yield.	The cytokinins have been implicated in many facets of plant growth and development including cell division and differentiation, shoot and root growth, apical dominance, senescence, fruit and seed development, and the response to biotic and abiotic stressors. Cytokinin levels are regulated by a balance between biosynthesis [isopentenyl transferase (IPT)], activation [Lonely Guy (LOG)], inactivatio…	Paula Elizabeth Jameson	Jameson, PE; Song, J	School of Biological Sciences, University of Canterbury, Christchurch 8140, New Zealand Paula.Jameson@canterbury.ac.nz.
29218376	Ghd7.1	29218376	Characteristic and inheritance analysis of targeted mutagenesis mediated by genome editing in rice.	The transcription activator-like effector nucleases (TALEN) and clustered regularly interspaced short palindromic repeats/CRISPR-associated protein 9 (CRISPR/Cas9) systems are two current genome editing technologies. Here, we compare and analyze the characteristics of the targeted mutations mediated by these two systems, such as efficiency, type, position, time, and genetic patterns. Both the TAL…	Li Tang	Tang, L; Li, YK; Zhang, D; Mao, BG; Lv, QM; Hu, YY; Shao, Y; Peng, Y; Zhao, BR; Xia, ST	1. Hunan Provincial Key Laboratory of Phytohormones and Growth Development, College of Bioscience and Biotechnology, Hunan Agricultural University, Changsha 410128, China; 2. State Key Laboratory of Hybird Rice, Hunan Hybrid Rice Research Center, Changsha 410125, China;
29241845	Nl-cn	29241845	A reduction of sucrose phosphate synthase (SPS) activity affects sucrose/starch ratio in leaves but does not inhibit normal plant growth in rice.	Sucrose phosphate synthase (SPS) has been shown to mediate sucrose/starch ratio in plant leaves through studies of 'starch leaf' species that mainly accumulate starch in their leaves. However, the contribution of SPS to sucrose/starch ratio in rice leaves, which mainly accumulate sucrose (i.e., 'sugar leaf'), has not been confirmed due to inconsistencies in the results of previous studies. In thi…	Yoichi Hashida	Hashida, Y; Hirose, T; Okamura, M; Hibara, KI; Ohsugi, R; Aoki, N	Graduate School of Agricultural and Life Sciences, The University of Tokyo, 1-1-1 Yayoi, Bunkyo-ku, Tokyo 113-8657, Japan.
29269023	H3K27me3	29269023	Exploiting the CRISPR/Cas9 System for Targeted Genome Mutagenesis in Petunia.	Recently, CRISPR/Cas9 technology has emerged as a powerful approach for targeted genome modification in eukaryotic organisms from yeast to human cell lines. Its successful application in several plant species promises enormous potential for basic and applied plant research. However, extensive studies are still needed to assess this system in other important plant species, to broaden its fields of…	Bin Zhang	Zhang, B; Yang, X; Yang, C; Li, M; Guo, Y	Chongqing Engineering Research Centre for Floriculture, Key Laboratory of Horticulture Science for Southern Mountainous Regions, Ministry of Education, College of Horticulture and Landscape Architecture, Southwest University, Chongqing 400716, China.
	OsCMT3a
	OsMET1b
	PRC2
	WOX2L
29292253	A 4.1R	29292253	Regulatory hurdles for genome editing: process- vs. product-based approaches in different regulatory contexts.	Novel plant genome editing techniques call for an updated legislation regulating the use of plants produced by genetic engineering or genome editing, especially in the European Union. Established more than 25 years ago and based on a clear distinction between transgenic and conventionally bred plants, the current EU Directives fail to accommodate the new continuum between genetic engineering and …	Thorben Sprink	Sprink, T; Eriksson, D; Schiemann, J; Hartung, F	Institute for Biosafety in Plant Biotechnology, Julius Kuehn Institute, Erwin-Baur-Str. 27, 06484, Quedlinburg, Germany.
29327444	Tx430	29327444	A geminivirus-based guide RNA delivery system for CRISPR/Cas9 mediated plant genome editing.	CRISPR/Cas has emerged as potent genome editing technology and has successfully been applied in many organisms, including several plant species. However, delivery of genome editing reagents remains a challenge in plants. Here, we report a virus-based guide RNA (gRNA) delivery system for CRISPR/Cas9 mediated plant genome editing (VIGE) that can be used to precisely target genome locations and caus…	Kangquan Yin	Yin, K; Han, T; Liu, G; Chen, T; Wang, Y; Yu, AY; Liu, Y	Center for Plant Biology, MOE Key Laboratory of Bioinformatics, School of Life Sciences, Tsinghua University, Beijing 100084, China.
29331077	AcPDS	29331077	DNA-free genome editing in plants with preassembled CRISPR-Cas9 ribonucleoproteins.	Editing plant genomes without introducing foreign DNA into cells may alleviate regulatory concerns related to genetically modified plants. We transfected preassembled complexes of purified Cas9 protein and guide RNA into plant protoplasts of Arabidopsis thaliana, tobacco, lettuce and rice and achieved targeted mutagenesis in regenerated plants at frequencies of up to 46%. The targeted sites conta…	Je Wook Woo	Woo, JW; Kim, J; Kwon, SI; Corvalán, C; Cho, SW; Kim, H; Kim, SG; Kim, ST; Choe, S; Kim, JS	Convergence Research Center for Functional Plant Products, Advanced Institutes of Convergence Technology, Yeongtong-gu, Suwon-si, Gyeonggi-do, Korea.
29332168	AteCas9	29332168	Identification of an epithelial cell receptor responsible for Clostridium difficile TcdB-induced cytotoxicity.	Clostridium difficile is the leading cause of hospital-acquired diarrhea in the United States. The two main virulence factors of C. difficile are the large toxins, TcdA and TcdB, which enter colonic epithelial cells and cause fluid secretion, inflammation, and cell death. Using a gene-trap insertional mutagenesis screen, we identified poliovirus receptor-like 3 (PVRL3) as a cellular factor necess…	Michelle E LaFrance	LaFrance, ME; Farrow, MA; Chandrasekaran, R; Sheng, J; Rubin, DH; Lacy, DB	Department of Biochemistry, Vanderbilt University School of Medicine, Nashville, TN 37232;
	F3H
29362095	FLN2	29362095	Genome editing. The new frontier of genome engineering with CRISPR-Cas9.	The advent of facile genome engineering using the bacterial RNA-guided CRISPR-Cas9 system in animals and plants is transforming biology. We review the history of CRISPR (clustered regularly interspaced palindromic repeat) biology from its initial discovery through the elucidation of the CRISPR-Cas9 enzyme mechanism, which has set the stage for remarkable developments using this technology to modi…	Jennifer A Doudna	Doudna, JA; Charpentier, E	Howard Hughes Medical Institute, Department of Molecular and Cell Biology, University of California, Berkeley, CA 94720, USA. Department of Chemistry, University of California, Berkeley, CA 94720, USA. Physical Biosciences Division, Lawrence Berkeley National Laboratory, Berkeley, CA 94720, USA. doudna@berkeley.edu emmanuelle.charpentier@helmholtz-hzi.de.
	hsa1
29459263	Apoe	29459263	CRISPR-S: an active interference element for a rapid and inexpensive selection of genome-edited, transgene-free rice plants.		Hai-Ping Lu	Lu, HP; Liu, SM; Xu, SL; Chen, WY; Zhou, X; Tan, YY; Huang, JZ; Shu, QY	National Key Laboratory of Rice Biology and Zhejiang Provincial Key Laboratory of Crop Germplasm Resources, Institute of Crop Science, Zhejiang University, Hangzhou, China.
	Ldlr
29492697	SPL9	29492697	Genome editing: intellectual property and product development in plant biotechnology.	Genome editing is a revolutionary technology in molecular biology. While scientists are fascinated with the unlimited possibilities provided by directed and controlled changes in DNA in eukaryotes and have eagerly adopted such tools for their own experiments, an understanding of the intellectual property (IP) implications involved in bringing genome editing-derived products to market is often lac…	Helga Schinkel	Schinkel, H; Schillberg, S	Department of Plant Biotechnology, Fraunhofer Institute for Molecular Biology and Applied Ecology IME, Forckenbeckstrasse 6, 52074, Aachen, Germany.
29531752	PDS	29531752	Function genomics of abiotic stress tolerance in plants: a CRISPR approach.		Mukesh Jain	Jain, M	Functional and Applied Genomics Laboratory, National Institute of Plant Genome Research New Delhi, India.
29532865	ASXL1	29532865	An introduction to synthetic biology in plant systems: ERASynBio/OpenPlant summer school for early career researchers, September 2014.		Ruth E Carmichael	Carmichael, RE; Boyce, A; Matthewman, C; Patron, NJ	Biotechnology and Biological Sciences Research Council, Polaris House, North Star Avenue, Swindon, SN2 1UH, UK.
29552023	TcNPR3	29552023	Efficient genome editing in plants using a CRISPR/Cas system.		Zhengyan Feng	Feng, Z; Zhang, B; Ding, W; Liu, X; Yang, DL; Wei, P; Cao, F; Zhu, S; Zhang, F; Mao, Y; Zhu, JK	1] Shanghai Center for Plant Stress Biology, Chinese Academy of Sciences, Shanghai 200032, China [2] Institute of Plant Physiology and Ecology, Shanghai Institutes for Biological Sciences, Chinese Academy of Sciences, Shanghai 200032, China [3] University of Chinese Academy of Sciences, Shanghai 200032, China.
